# Supplementary material for: PLAA Mutations Cause a Lethal Infantile Epileptic Encephalopathy by Disrupting Ubiquitin-Mediated Endolysosomal Degradation of Synaptic Proteins
Source: PubMed Central journal article supplement (PMC5420347; doi:10.1016/j.ajhg.2017.03.008), 2017-04-13
Supplement: mmc5.pdf [file mmc5.pdf]

# PLAA Mutations Cause a Lethal Infantile Epileptic Encephalopathy by Disrupting Ubiquitin-Mediated Endolysosomal Degradation of Synaptic Proteins

Emma A. Hall,<sup>1,19</sup> Michael S. Nahorski,<sup>2,3,19</sup> Lyndsay M. Murray,<sup>4,5</sup> Ranad Shaheen,<sup>6</sup> Emma Perkins,<sup>4,5</sup> Kosala N. Dissanayake,<sup>5,13,16</sup> Yosua Kristaryanto,<sup>7</sup> Ross A. Jones,<sup>4,5</sup> Julie Vogt,<sup>8</sup> Manon Rivagorda,<sup>1</sup> Mark T. Handley,<sup>1</sup> Girish R. Mali,<sup>1</sup> Tooba Quidwai,<sup>1</sup> Dinesh C. Soares,<sup>1,9</sup> Margaret A. Keighren,<sup>1</sup> Lisa McKie,<sup>1</sup> Richard L. Mort,<sup>1</sup> Noor Gammoh,<sup>10</sup> Amaya Garcia-Munoz,<sup>11</sup> Tracey Davey,<sup>12</sup> Matthieu Vermeren,<sup>1</sup> Diana Walsh,<sup>8</sup> Peter Budd,<sup>1</sup> Irene A. Aligianis,<sup>1</sup> Eissa Fageih,<sup>14</sup> Alan J. Quigley,<sup>15</sup> Ian J. Jackson,<sup>1</sup> Yogesh Kulathu,<sup>7</sup> Mandy Jackson,<sup>4,5</sup> Richard R. Ribchester,<sup>5,13,16</sup> Alex von Kriegsheim,<sup>10,11</sup> Fowzan S. Alkuraya,<sup>6,17,18</sup> C. Geoffrey Woods,<sup>2,3</sup> Eamonn R. Maher,<sup>3,\*</sup> and Pleasantine Mill<sup>1,\*</sup>

During neurotransmission, synaptic vesicles undergo multiple rounds of exo-endocytosis, involving recycling and/or degradation of synaptic proteins. While ubiquitin signaling at synapses is essential for neural function, it has been assumed that synaptic proteostasis requires the ubiquitin-proteasome system (UPS). We demonstrate here that turnover of synaptic membrane proteins via the endolysosomal pathway is essential for synaptic function. In both human and mouse, hypomorphic mutations in the ubiquitin adaptor protein *PLAA* cause an infantile-lethal neurodysfunction syndrome with seizures. Resulting from perturbed endolysosomal degradation, *Plaa* mutant neurons accumulate K63-polyubiquitylated proteins and synaptic membrane proteins, disrupting synaptic vesicle recycling and neurotransmission. Through characterization of this neurological intracellular trafficking disorder, we establish the importance of ubiquitin-mediated endolysosomal trafficking at the synapse.

## Introduction

The ubiquitin code involves post-translational modification of target proteins by covalently attaching ubiquitin (Ub) via lysine residues, coordinating diverse and essential processes. Disruption of Ub-mediated signaling causes a range of disease phenotypes including cancer, immune deficiency, diabetes, and neurodegeneration.<sup>2</sup> The ubiquitin code is complex, with polyUb chains formed by covalent attachment to lysines (K) present on ubiquitin itself. The precise lysine residue used in linkages dictates the structure of the chains, altering the outcome for the target protein; Lys48 (K48) polyUb chains are primarily involved in proteasomal targeting, whereas Lys63 (K63) polyUb chains are involved in signaling, DNA repair, or endocytosis. Interpretation of this code is mediated by diverse Ub-binding proteins via their Ub-binding domains

(UBDs), which show differential affinity to the various ubiquitin modifications.<sup>3</sup>

Presynaptic terminals undergo extensive membrane remodeling during synaptic activity, with repeated rounds of exo-endocytosis of synaptic vesicles (SVs). Sustained neurotransmission depends on high-fidelity sorting of synaptic proteins during SV recycling.<sup>4</sup> This is essential for neural function because too little or too much of critical synaptic membrane proteins, including SV2 and SNAP25, results in seizures, synaptic dysfunction, and early lethality.<sup>5–9</sup> How this process is regulated and the involvement of ubiquitin signaling remains unclear.

Ubiquitin signaling has long been known to play a role in synapse development and plasticity,<sup>10</sup> but this is generally attributed to the dependence of synaptic proteostasis on the UPS.<sup>11–13</sup> Indeed, acute depolarization of isolated

<sup>1</sup>MRC Human Genetics Unit, Institute of Genetics and Molecular Medicine, University of Edinburgh, Edinburgh EH4 2XU, UK; <sup>2</sup>Cambridge Institute for Medical Research, University of Cambridge, Cambridge CB2 0XY, UK; <sup>3</sup>Department of Medical Genetics, University of Cambridge, and Cambridge NIHR Biomedical Research Centre, Cambridge Biomedical Campus, Cambridge CB2 0XY, UK; <sup>4</sup>Centre for Integrative Physiology, University of Edinburgh, Edinburgh EH8 9XD, UK; <sup>5</sup>Euan MacDonald Centre for Motor Neuron Disease Research, University of Edinburgh, Edinburgh EH16 4SB, UK; <sup>6</sup>Department of Genetics, King Fahad Specialist Hospital and Research Center, Riyadh 11211, Saudi Arabia; <sup>7</sup>MRC Protein Phosphorylation and Ubiquitylation Unit, University of Dundee, Dundee DD1 5EH, UK; <sup>8</sup>West Midlands Regional Genetics Service, Clinical Genetics Unit, Birmingham Women's Hospital, Birmingham B15 2TG, UK; <sup>9</sup>Centre for Genomic and Experimental Medicine, Institute of Genetics and Molecular Medicine, University of Edinburgh, Edinburgh EH4 2XU, UK; <sup>10</sup>Edinburgh Cancer Research UK Centre, Institute of Genetics and Molecular Medicine, University of Edinburgh, Edinburgh EH4 2XU, UK; <sup>11</sup>Systems Biology Ireland, University College Dublin, Dublin, Ireland; <sup>12</sup>Electron Microscopy Research Services, Newcastle University, Newcastle NE2 4HH, UK; <sup>13</sup>Patrick Wild Centre, University of Edinburgh, Edinburgh EH8 9XD, UK; <sup>14</sup>Department of Pediatric Subspecialties, Children's Hospital, King Fahad Medical City, Riyadh 11211, Saudi Arabia; <sup>15</sup>NHS Lothian, Department of Paediatric Radiology, Royal Hospital for Sick Children, Edinburgh EH9 1LF, UK; <sup>16</sup>Centre for Cognitive and Neural Systems, University of Edinburgh, Edinburgh EH8 9JZ, UK; <sup>17</sup>Department of Anatomy and Cell Biology, College of Medicine, Alfaisal University, Riyadh 11533, Saudi Arabia; <sup>18</sup>Saudi Human Genome Program, King Abdulaziz City for Science and Technology, Riyadh 11442, Saudi Arabia

<sup>19</sup>These authors contributed equally to this work

\*Correspondence: [erm1000@medschl.cam.ac.uk](mailto:erm1000@medschl.cam.ac.uk) (E.R.M.), [pleasantine.mill@igmm.ed.ac.uk](mailto:pleasantine.mill@igmm.ed.ac.uk) (P.M.)

<http://dx.doi.org/10.1016/j.ajhg.2017.03.008>

© 2017 The Author(s). This is an open access article under the CC BY license (<http://creativecommons.org/licenses/by/4.0/>).

synaptosomes causes a global decrease in Ub-modified proteins, highlighting the rapid turnover rate of polyUb-proteins presynaptically.<sup>14</sup> In the case of neurodegenerative disease, proteotoxic accumulations of Ub are noted as a hallmark,<sup>15</sup> although in several of these disorders, the earliest symptoms are synaptic dysfunction.<sup>16</sup> Exactly how this ubiquitin signaling is acting locally at the synapse to regulate normal presynaptic function is unclear. An alternative to the exclusively UPS-based model of synaptic proteostasis was first suggested decades ago whereby synaptic membrane protein turnover could involve endolysosomes.<sup>17</sup> However, subsequent work has focused on exploring neuronal-specific “sort-and-degrade” mechanisms for synaptic cargos via endosomal intermediates whereupon the tie to Ub signaling has been obscured.<sup>18,19</sup> Results from two recent cell-based studies suggest that Ub signaling in synaptic vesicle turnover needs revisiting.<sup>1,20</sup>

Here we describe, in four families, a severe early-onset neurodysfunction syndrome characterized by profound developmental delay and seizures resulting from homozygous mutations in the gene encoding ubiquitin binding protein Phospholipase A<sub>2</sub> Activating Protein (*PLAA* [MIM: 603873]). *PLAA* binds ubiquitin through two UBDs, a high-affinity WD40 β-propeller, and a low-affinity PFU (*PLAA* family of Ub-binding) domain.<sup>21,22</sup> *PLAA* is the highly conserved ortholog of yeast Ufd3/Doa1 (FungiDB: YKL213C; 40% protein ID), which has well-documented roles in targeting ubiquitylated proteins for degradation through the ubiquitin-proteasome system (UPS) via interactions with the segregase p97/CDC48,<sup>21,23</sup> as well as regulating levels of free ubiquitin.<sup>24</sup> Together with CDC48, Doa1 is suggested to play roles in diverse degradative processes including mitochondria-associated degradation (MAD)<sup>25</sup> and starvation-induced degradation of mature ribosomes (ribophagy).<sup>26</sup> Independent of its role in regulating free ubiquitin, Doa1 was shown to be required for sorting specific ubiquitylated cargos to late endosomes/MVBs for lysosomal degradation.<sup>27,28</sup> Despite the proposed roles for yeast ortholog Ufd3/Doa1 in Ub-dependent trafficking, the role of mammalian *PLAA* remains unclear.

We demonstrate that *PLAA* is required for the Ub-mediated sorting of membrane proteins from the early to late endosome, targeting them for lysosomal degradation. Unlike in yeast, in the absence of *PLAA* we see no changes in free ubiquitin, although we observe the specific accumulation and altered processing of a subset of K63-ubiquitylated proteins. Importantly, we demonstrate that *PLAA* is essential for neural function, through dual roles of (1) regulating post-endocytic trafficking of signaling receptors necessary for neural development and (2) directing sorting of synaptic vesicle (SV) components during recycling, essential for synaptic function. This work demonstrates that ubiquitin-dependent endolysosomal proteostasis at the synapse is essential at the level of complex neural networks in humans and mice.

## Material and Methods

### Subject Ascertainment

Affected individuals in families A–C were ascertained following referral to the local NHS Regional Clinical Genetics Service. At the time of referral and clinical assessment, no clinical laboratory molecular genetic testing was available to confirm the working clinical diagnosis in each family and the families were recruited to a research study to investigate the molecular basis of the disorder. Research was conducted according to the principles expressed in the Declaration of Helsinki and was approved by the local Research Ethics Committees. All participants provided informed consent for the collection of samples and subsequent analysis. Family D was recruited with informed consent under an IRB-approved protocol (KFSHRC).

### Gene Mapping

Genome-wide genetic linkage studies were performed using Affymetrix SNP arrays (10k array in A-IV-6 and A-IV-7 and 250k in A-IV-1 and A-IV-8) in affected individuals (as described previously<sup>29</sup> and Axiom in family D). Homozygous regions  $\geq 2$  Mb were further analyzed by typing microsatellite markers in all family members from whom DNA was available.

### Exome Sequencing

Exome sequencing was performed on one affected child from all families using the SureSelect Human All Exon 50Mb Kit (Agilent Technologies UK, Cat. No G3370A). Sequencing was performed with the SOLiD4 System (Applied Biosystems) with 50 bp fragment reads (in families B and C) or the Illumina Analyzer Iix with 76 bp paired end reads (in families A and D). Raw sequencing reads were mapped to the GRCh37 reference human genome and changes compared to this reference sequence identified. Analyses focused on non-synonymous coding, nonsense, splice site variants, and indels involving exons. Potentially pathogenic mutations were identified based upon being unknown variants or those where the rare allele frequency was  $< 1\%$ , how well the site was conserved throughout evolution, and re-examination of the sequence reads containing potential mutations using the Integrated Genome Viewer. Analysis of the 84 genes in the candidate interval in family A revealed only one rare potentially pathogenic variant in *PLAA* (Table S2). This c.68G>T mutation in *PLAA* was found to segregate correctly by Sanger sequencing in families A, B, and C.

### Generation of Mouse Models

Animals were maintained in SPF environment and studies carried out in accordance with the guidance issued by the Medical Research Council in “Responsibility in the Use of Animals in Medical Research” (July 1993) and licensed by the Home Office under the Animals (Scientific Procedures) Act 1986. *Plaa*-null mice (*Plaa*<sup>tm1(NCOM)Cmhd</sup>, MGI:4880046) were generated as detailed in Figure S2. *Plaa*<sup>G23V/+</sup> mice (*Plaa*<sup>em1Pmi</sup> MGI:5828117) were generated using the CRISPR-nickase Cas9 system as described in Figure S4. Genotyping was performed using primers detailed in Table S9.

### Mouse Phenotyping

#### Gait Analysis

*Plaa*<sup>G23V/G23V</sup> and wild-type littermate control mice were videoed in a custom-made gait analysis chamber. Each paw placement in

2D was recorded manually using a custom macro written for ImageJ (code available upon request). Parameters such as step length, step time, and number of steps taken were calculated in Excel. Mice were analyzed at a variety of ages from 4 to 16 weeks, and altered gait was evident at all ages tested.

#### **Grip Strength Test**

Mice grip a metal grid attached to a sensor (Bioseb) with either their forelimbs only or both fore- and hindlimbs and maximal grip strength was recorded.

#### **LacZ Staining**

Adult *Plaa*<sup>+/-</sup> brains were fixed briefly in 4% PFA/PBS for 1 hr at 4°C, then 200 µm vibratome sections were cut and collected into PBS. E11.5 (embryonic day) *Plaa*<sup>+/-</sup> embryos were fixed in 4% PFA/PBS for 20 min at 4°C. LacZ staining was performed as described.<sup>30</sup>

#### **Magnetic Resonance Imaging**

Brains from 3-month-old animals were fixed in 4% PFA in the skull, with septum broken to aid penetration, for 5 days at 4°C, rotating. Brains were incubated in contrasting agent Dotarem (Guebert) for 7 days. Imaging was performed on a 7-Tesla small animal imaging system controlled by an Agilent Vnmrj 4 console (Agilent Technologies). The specimen was placed in the center of a 26-mm volume coil (Rapid Biomedical) used for radiofrequency transmission and reception. Structural imaging was accomplished using a 3D gradient echo sequence with repetition time = 30 ms, echo time = 6.22 ms, flip angle = 50°. The acquisition matrix was 512 × 192 × 192 over a 40 mm × 17 mm × 17 mm field of view, resulting in an image resolution of 78 × 88 × 88 µm. The images were analyzed in Fiji, using manual segmentation.

#### **Transcriptomics**

*Plaa*<sup>+/+</sup> or *Plaa*<sup>G23V/G23V</sup> brains (n = 3 per genotype) were subdivided into caudal (including cerebellum, medulla, and pons) and rostral (cerebrum) regions. Total RNA was extracted using QIAGEN RNAeasy Lipid mini kits, including on-column DNase digestion as per manufacturer's direction. Expression analysis was performed using the Affymetrix GeneChip Mouse Transcriptome Array 1.0 (Aros) and analyzed using Affymetrix Transcriptome Analysis Software. Results were confirmed by qPCR using Roche Universal Probe Library (UPL) System on a LightCycler 480. Primer and probe sequences are available upon request.

#### **Neuromuscular Junction Morphological Analysis**

Protocol for NMJ morphological analysis is described in the legend of Figure S6. A minimum of 50 NMJs from a minimum of 3 fields of view were quantified per muscle. Pre-synaptic accumulations were defined as near-spherical neurofilament-positive structures that occurred at the pre-synaptic terminal. Sprouts were defined as a neurofilament-positive process that extended from the pre-synaptic terminal. Methods for NMJ transmission electron microscopy are described in the legend of Figure S6.

#### **NMJ Electrophysiology**

Levator auris longus (LAL) muscles were dissected into HEPES-buffered mammalian physiological saline (MPS; composition in mM: Na<sup>+</sup> 158, K<sup>+</sup> 5, Ca<sup>2+</sup> 2, Mg<sup>2+</sup> 1, Cl<sup>-</sup> 169, glucose 11, HEPES 5 [pH 7.2–7.4]). Intracellular recordings of spontaneous miniature endplate potentials (MEPPs) and supramaximal nerve-evoked EPPs (<10V, <0.2 ms stimulation pulses) were recorded using glass microelectrodes filled with KCl (3M; resistance typically 20–30 MΩ) after selectively blocking muscle action potentials using µ-conotoxin GIIIB, as described previously.<sup>31,32</sup> Data were acquired and analyzed using a combination of WinWCP (Strathclyde Electrophysiological Software), Spike-2 (Cambridge

Electronic Design), Minianalysis (Synptosoft), pCLAMP (Molecular Devices), and Prism (Graphpad) software.

#### **NMJ Synaptic Vesicle Recycling**

Motor nerve terminals in isolated LAL muscles (dissected as above) were bathed in MPS containing FM1-43 (8 µM) together with rhodamine (TRITC)-α-bungarotoxin (5 µg/mL; both from Thermo-Fisher Scientific) to counterstain endplate acetylcholine receptors. One of the innervating intercostal nerves was stimulated continuously at 20 Hz for 10 min, and then NMJs were imaged, after washing for >30 min in MPS, using confocal microscopy as described previously.<sup>33,34</sup> Images were processed for overall brightness, contrast, and gamma only using Photoshop (Adobe) and then analyzed using ImageJ.

#### **Acute Cerebellar Slices**

Cerebella were dissected from 3-month-old mice into ice-cold modified artificial cerebrospinal fluid (ACSF) containing (in mM): 60 NaCl, 118 sucrose, 26 NaHCO<sub>3</sub>, 2.5 KCl, 11 glucose, 1.3 MgCl<sub>2</sub>, and 1 NaH<sub>2</sub>PO<sub>4</sub> at pH 7.4 when bubbled with 95% O<sub>2</sub>:5% CO<sub>2</sub>. The cerebellar vermis was glued to the vibratome cutting platform (Leica Biosystems) with cyanoacrylate adhesive. 200 µm-thick sagittal slices were cut and incubated for 30 min at 30°C in standard ACSF composed of the following (in mM): 119 NaCl, 2.5 CaCl<sub>2</sub>, 26 NaHCO<sub>3</sub>, 2.5 KCl, 11 glucose, 1.3 MgCl<sub>2</sub>, and 1 NaH<sub>2</sub>PO<sub>4</sub> at pH 7.4 when bubbled with 95% O<sub>2</sub>:5% CO<sub>2</sub>. Slices were stored at room temperature until required, then transferred to a submerged recording chamber and superfused with standard ACSF (3–5 mL min<sup>-1</sup>) at 30°C.

#### **Purkinje Cell Electrophysiology**

Whole-cell recordings were made from Purkinje cells voltage-clamped at -70 mV using thick-walled borosilicate glass pipettes pulled to 3–5 MΩ. For recording mIPSCs, the internal solution contained (in mM): 150 CsCl, 1.5 MgCl<sub>2</sub>, 10 HEPES, 0.1 cesium BAPTA, 2 sodium ATP, 0.4 sodium GTP, 5 QX-314 at pH 7.3. NBQX (10 µM) and tetrodotoxin (300 nM) were added to the ACSF to isolate mIPSCs. Series resistances were <15 MΩ and were compensated for by 85%. Currents were filtered at 6 kHz and sampled at 10 kHz. Data was acquired and analyzed using pClamp 10 (Axon Instruments).

#### **Purkinje Cell Single-Cell Imaging**

Whole-cell recordings from Purkinje cells were performed with an internal solution containing (in mM): 0.2 Lucifer Yellow (Sigma, L0144), 0.02 Alexa FluorAR 568 hydrazide (Invitrogen, A-10441), 125 K-gluconate, 15 KCl, 10 HEPES, 5 EGTA, 2 MgCl<sub>2</sub>, 0.4 NaGTP, 2 NaATP, and 10 Na-phosphocreatine at pH 7.4. Purkinje cells were voltage-clamped at -60 mV for 25–30 min and complete cell filling was monitored by Lucifer Yellow fluorescence. Slices were then fixed with 4% paraformaldehyde in 0.1 M phosphate buffer (pH 7.4) overnight at 4°C. Slices were washed twice in 0.1 M phosphate buffer (pH 7.4) and twice in dH<sub>2</sub>O then stored in Vectashield (Vector Laboratories) at 4°C. Slices were wet-mounted with Vectashield onto 0.13 mm thick borosilicate glass and imaged using a Zeiss inverted LSM510 confocal microscope. Dendritic length and surface area was analyzed using ImageJ software (NIH).

#### **Mass Spectrometry**

*Plaa*<sup>+/+</sup> or *Plaa*<sup>G23V/G23V</sup> brains (n = 3 per genotype) were subdivided into caudal (including cerebellum, medulla, and pons) and rostral (cerebrum) regions and were homogenized in 100 mM Tris-HCl (pH 7.5) in presence of protease and phosphatase inhibitors (Roche). Samples were homogenized with an Ultra-Turrax T25 High-Speed Homogenizer System for 1 min on ice and SDS was added to a final concentration of 2% SDS. Lysates were sonicated and clarified by centrifugation. Samples were

processed by a multi-protease FASP protocol as described.<sup>35</sup> In brief, the SDS was removed and the proteins were first digested with Lys-C (Wako) and subsequently with Trypsin (Promega) with an enzyme to protein ratio (1:50). 10 µg of Lys-C and Trypsin digests were loaded separately and desalted on C18 Stage tip and eluates were analyzed by HPLC coupled to a Q-Exactive mass spectrometer as described previously.<sup>36</sup> Peptides and proteins were identified and quantified with the MaxQuant software package, and label-free quantification was performed by MaxLFQ.<sup>37</sup> The search included variable modifications for oxidation of methionine, protein N-terminal acetylation, and carbamidomethylation as fixed modification. Peptides with at least seven amino acids were considered for identification. The false discovery rate, determined by searching a reverse database, was set at 0.01 for both peptides and proteins. All bioinformatic analyses were performed with the Perseus software. Intensity values were log-normalized, 0-values were imputed by a normal distribution 1.8  $\pi$  down of the mean and with a width of 0.2  $\pi$ . Statistically significant variance between the sample groups was tested by a permutation-based FDR approach and a Student's t test with a p value cut-off of 0.01. Total proteomic data are available via ProteomeXchange with identifier PXD003140 and are summarized in Table S6.

#### Synaptic Preparations

Cerebella were lysed in SYN-Per Synaptic Protein Extraction Reagent (ThermoScientific) according to manufacturer's instructions.

#### Homology Modeling and Mutation Analysis

The target WD40 seven-bladed  $\beta$ -propeller domain of human PLAA was modeled by homology based upon the high-resolution crystal structure template of yeast Doa1-WD40 (PDB: 3ODT; chain B, 1.35 Å resolution).<sup>22</sup> The two sequences share 43% sequence identity and 60% similarity. The target-template alignment was generated based upon an initial multiple sequence alignment of related-divergent orthologs using PROMALS<sup>38</sup> and manually edited to optimize positions of secondary structure elements and gaps. A total of 50 models were built for the human PLAA-WD40 using Modeler 9v12<sup>39</sup> and the model with the lowest objective function score was selected. The selected 3D model was checked for valid stereochemistry using RAMPAGE<sup>40</sup> (98% of residues in favored and allowed regions of the Ramachandran plot); the packing quality was evaluated using the WHATIF server<sup>41</sup> (average quality control score -0.52; to place this in context, incorrect models give scores of < -3.0; lower quality models < -2.0; and the average quality of 200 highly refined X-ray structures -0.5 [ $\pm 0.4$ ]; and the model assessed using the MetaMQAPII server<sup>42</sup> [Global model accuracy: GDT\_TS: 81.07; RMSD: 2.2 Å]). The empirical force-field FoldX<sup>43,44</sup> under the YASARA<sup>45,46</sup> molecular visualization program was used to estimate the free energy difference ( $\Delta\Delta G$ ) stability change upon mutagenesis from wild-type (p.Gly23Val) in silico. The FoldX "RepairPDB" option followed by "Mutate residue" was used to calculate the stability change (number of runs: 3; pH: 7; temperature: 298 K; ionic strength: 0.05 M; VdW design: 2). The resulting mean energy is expressed in kcal/mol, and the prediction decision on whether the mutation destabilizes structure is based upon Schymkowitz et al.<sup>43</sup> and Guiois et al.<sup>44</sup> where severely reduced structural stability  $\Delta\Delta G$  is considered to be >1.6 kcal/mol. Intra-protein residue interactions were determined using the Protein Interactions Calculator (PIC).<sup>47</sup> PyMol was used for 3D visualization, analysis, and figure preparation.

#### MEF Culture

Mouse embryonic fibroblasts (MEFs) were maintained, transfected, and processed for immunofluorescence with antibodies detailed in Tables S7 and S8 as previously published.<sup>30</sup> To assess endocytic trafficking, cells were transfected with 30 particles per cell of Bacman 2.0 Rab5GFP and Rab7RFP (CellLight, Molecular Probes), incubated for 18 hr in media without serum, then 100 ng/mL EGF-Alexa-647 (Molecular Probes) was added in media plus 10% serum for 10 or 15 min. Cells were fixed in 4% PFA, costained with DAPI, and mounted. Alternately, cells were transfected with Rab5<sup>Q79L</sup>-RFP, EGFR-GFP, or DOP-Flag,<sup>48</sup> incubated in media without serum for 18 hr, then treated with ligands (100 ng/mL EGF, 5 µM DPDPE [Abcam]) for 90 min. Cells were fixed and costained with anti-EEA1 and anti-FLAG antibodies (Table S7), DAPI, and mounted.

For analysis of UPS and autophagy, cells were treated with 200 µM MG132 (Sigma) and/or 100 nM Bafilomycin-A1 (Sigma), and/or starved in EBSS media (Invitrogen) for 3 hr. Cells were rinsed twice in PBS and harvested by lysing in hot (100°C) SDS buffer (0.01 M Tris-EDTA [pH 7.5], 1% SDS). Lysates were then boiled at 100°C for 5 min, followed by brief sonication. After SDS-PAGE on a variety of NuPAGE precast gels, proteins were transferred to Nitrocellulose (Thermo Fischer Scientific) or Hybond-P membranes (GE Healthcare Life Sciences). Membranes were probed with antibodies detailed in Table S7. Images were captured using an ImageQuant LAS 4000 (GE Healthcare Life Sciences) and semiquantitative protein detection was done by ImageJ.

#### UPS Activity Assay

Cerebella or MEFs were lysed in UPS buffer (10 mM Tris, 1 mM EDTA, 1 mM EGTA, 250 mM sucrose, 1.5 mM MgCl<sub>2</sub>, 0.05% NP40, 5 mM DTT, and 2 mM ATP). Proteasome activity was determined by incubating equal amounts of protein with 1 µM fluorescent proteasome substrates N-succinyl-Leu-Leu-Val-Tyr-7-amino-4-methylcoumarin (Suc-LLVY-AMC: Sigma), Boc-Leu-Ser-Thy-Arg-AMC (Boc-LSTR-7-AMC: Sigma), or Z-Leu-Leu-Glu-AMC (Z-LLE-AMC: Sigma) as substrates for chymotrypsin, trypsin, and caspase-like activities of the proteasome, respectively, with or without 1 nM MG132 (Sigma) for 30 min at 37°C. Data reflect kinetics of the linear phases of the curves of fluorogenic substrate production measured on a Perkin Elmer Victor2 multiwell plate reader.

#### UPS Flux

Ub<sup>G76V</sup>-GFP (a gift from Nico Dantuma, Addgene plasmid #11941) was transfected into MEFs and mean GFP fluorescence intensity was determined by FACS 72 hr after transfection. This reporter contains the UFD signal of an N-terminal uncleavable ubiquitin moiety Ub<sup>G76V</sup> that serves as target for polyubiquitylation and degradation by the proteasome.<sup>49</sup>

#### Ubiquitin IPs

Brains were lysed in 50 mM Tris-HCl (pH 7.5), 1 mM EDTA, 1 mM EGTA, 1% (v/v) Triton-X, 0.27 M Sucrose, HALT Protease inhibitor (ThermoFisher), 1 mM DTT, 1 mM PMSE, 100 mM NEM. Halo-tagged Ubq1n1, Fam63, or Eps15 UBDs were immobilized on Halo-Link Resin (Promega) overnight at 4°C, washed, then incubated with brain lysates for 2 hr at 4°C, to immunoprecipitate proteins modified with specific ubiquitin chains. Resin was washed three times in lysis buffer, boiled in 1× NuPAGE LDS Sample



Buffer and Sample Reducing Agent (Thermo Fischer Scientific), and analyzed by western blot.

### Imaging and Image Analysis

Confocal images were captured with a Nikon A1R confocal microscope. Color brightfield images were captured with an Olympus Dotslide. Macroscopic images were captured on a Nikon AZ100 microscope with a Qimaging Micropublisher 5 cooled color camera (Qimaging). Image capture was performed using in-house scripts written for IVision (BioVision Technologies). Image analysis was performed with ImageJ. For analysis of EGF in early and late endosomes, each channel was background corrected with “RollingBall” and segmented to generate a binary image. Puncta were counted using “Find Maxima.” Images were combined to display only colocalization and the number of colocalizing puncta counted using “Find Maxima.” Plotted in the figure: “early endosome” localization represents EGF colocalizing with Rab5 only, “late endosome” localization represents EGF colocalizing with Rab7 only or Rab5 and Rab7. Analysis of membrane versus luminal localization in Rab5<sup>Q79L</sup> endosomes used in-house scripts (available upon request) in which the user defines the membrane and lumen based only on the red signal.

### Statistics

Statistical analyses were carried out in Microsoft Excel or GraphPad Prism6. Analysis of microarray data was performed in Affymetrix Transcriptome Analysis Console v3.0 and proteomic data in Perseus software.

## Results

### Homozygous Mutation in *PLAA* Causes a Severe Neurodevelopmental Disorder

In three consanguineous families, seven infants presented with a severe neurodevelopmental disorder—originally diagnosed as either PEHO (progressive encephalopathy with edema, hypsarrhythmia, and optic atrophy [MIM: 260565]) or acrocaldosal-like syndrome (MIM: 200990)—and were independently found to carry an identical c.68G>T (p.Gly23Val) missense substitution in *PLAA* (*Phospholipase A2-activating protein* [GenBank: NM\_001031689.2]) (Figures 1 and S1), encoding a highly conserved ubiquitin binding protein. We subsequently identified an individual from a fourth consanguineous family with a homozygous c.68dupG (p.Leu24Profs\*55) frameshift mutation who also presented with a similar but more severe neurodevelopmental disorder.

*PLAA*-associated neurodevelopmental disorder (PLAAND) is characterized at birth by truncal hypotonia, increased limb tone and feeding difficulties, mildly dysmorphic facial features, and hirsutism. Progressive limb spasticity, microcephaly, and optic atrophy developed in the first year (Figure 1F). Most had seizures that began between the first week of life and 2 years (Table 1 and S1). Where electroencephalogram (EEG) data are available, electroclinical seizures with hyper-rhythmic discharges were observed. Affected children die of apnea and recurrent pneumonia by 6 years of age (range 12 days to 6 years) (Table 1 and S1). MRI brain

findings in the first year included a thin corpus callosum, delayed myelination, a simple immature overall gyral pattern, particularly frontally, and large cavum septum pellucidum/vergae (Figures 1A–1E). Scans after 1 year showed features of cerebellar and cerebral atrophy.

Autozygosity mapping and exome sequencing identified the homozygous mutations within *PLAA*, which segregated in an autosomal-recessive manner in all four families (combined LOD score of 4.52 for families A–C, Figure S1). Although families A–C are not knowingly related, we inferred that the c.68G>T (p.Gly23Val) mutation was derived from a distant common ancestor, as it was inherited on the same haplotype (Table S2). The absence of either homozygous variant in ~3,000 ethnically matched control individuals and ExAC databases indicated these were probably the pathogenic mutations. Homology modeling of the N-terminal WD40 seven-bladed  $\beta$ -propeller in *PLAA* established the p.Gly23Val variant is buried within the innermost  $\beta$  strand of blade 2, where it is predicted to destabilize structure (mean  $\Delta\Delta G = 2.6$  kcal/mol). This WD40  $\beta$ -propeller domain is one of two UBDs found in *PLAA*, and the mutation lies close to the interface involved in high-affinity ubiquitin binding (monoUb Kd ~220  $\mu$ M)<sup>21,22</sup> (Figures 1G–1K).

### *PLAA* Is Essential for Mammalian Development and Endolysosomal Trafficking

As the function of mammalian *PLAA* is poorly understood, we generated a *Plaa*-null mouse model (Figures S2A and S2B). Expression studies confirmed ubiquitous expression of *Plaa*, with endogenous *PLAA* localizing throughout the cell, within the cytoplasm and nucleus (Figures S2C and S2D). *Plaa*<sup>-/-</sup> embryos die in mid-gestation (Table S3), with the few mutants surviving to E15.5 being runted and anemic (Figure S2E).

Pinpointing a functional role for mammalian *PLAA* is complicated by the diversity of roles described for yeast Ufd3/Doa1, including regulating free ubiquitin levels and trafficking of ubiquitylated proteins to various degradative pathways. In the absence of *PLAA*, no compensatory transcriptional changes in ubiquitin expression, global changes in free ubiquitin, or accumulation of polyUb chains were detected (Figure 2A). Moreover, proteasomal activity was not globally perturbed in *Plaa* mutants; in fact, decreased levels of ubiquitin-fusion degradation (UFD) proteasomal reporter Ub<sup>G76V</sup>-GFP suggest increased proteasomal flux in the absence of *PLAA* (Figures 2B and 2C). In *Plaa*<sup>-/-</sup> mutants, we detected no compensatory up-regulation of genes involved in Ub-based degradation pathways including ERAD or MAD (Figure S3A).

Integral membrane proteins undergo endocytosis and trafficking to the early endosome, where Ub-dependent sorting either recycles these proteins back to the plasma membrane or targets them for lysosomal degradation. This involves recognition of Ub-modified cargos for Endosomal Sorting Complexes Required for Transport (ESCRT)-dependent internalization into late endosomal compartments,

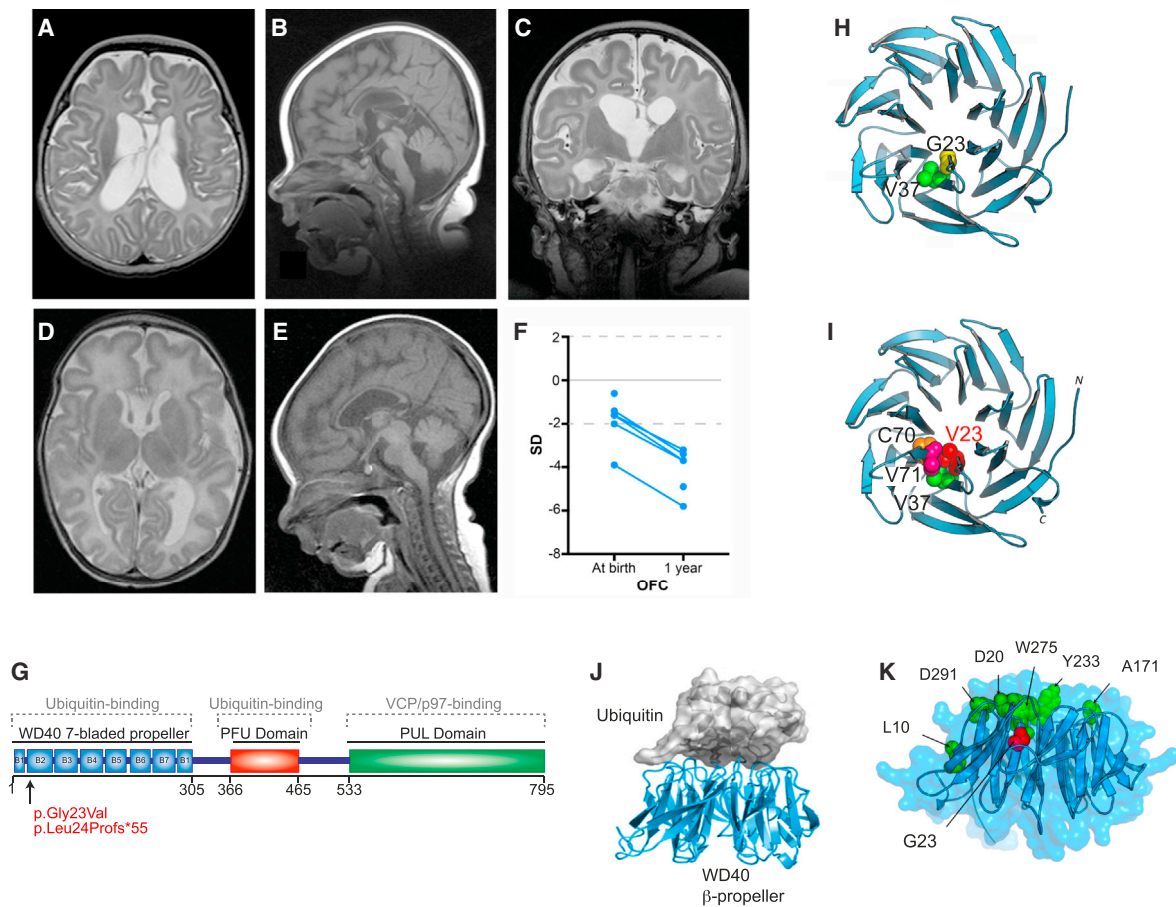

**Figure 1. Homozygous Mutations in PLAA Causes a Severe, Infantile Neurodysfunction Disorder**

(A–E) MRI images of individuals A-IV-8 (A–C, aged 3 months) and A-IV-1 (D, E, aged 3 weeks). Axial (A, D), sagittal (B, E), coronal (C), T1-weighted (B, D, E), T2-weighted (A, C). Widespread T2-hyperintensity throughout the white matter and simplified gyral pattern frontally are evident. Ventricles and occipital horns are asymmetrically dilatated (A, C). Thinning of corpus callosum is evident (B, E).

(F) Z-scores of the occipital frontal circumference (OFC) of affected individuals at birth and around a year highlight progressive microcephaly.

(G) The mutations fall in the first exon, within the WD40 repeat domain of PLAA.

(H) Homology model of the WD40 β-propeller domain of human PLAA, based upon the crystal structure of yeast Doa1; Gly23 is buried within the inner-most β strand 1 within blade 2 where it supports hydrophobic interaction with Val37.

(I) Mutant Val23 is predicted to destabilize structure likely due to steric clashes between its side chain CY1 atom with spatially proximal residues in blade 3 (labeled).

(J) Crystal structure of the yeast PLAA homolog Doa1 N-terminal WD40 β-propeller (cyan) in complex with ubiquitin (white surface), adapted from Pashkova et al.<sup>22</sup>

(K) Location of experimentally defined key residues for ubiquitin-binding (green) with respect to p.Gly23Val (red) shown mapped on the 3D model of human PLAA WD40 β-propeller.

See also [Figure S1](#).

or multivesicular bodies (MVBs), ahead of fusion with the lysosome.<sup>50</sup> Ufd3 was shown to direct ubiquitylated cargo for degradation via the MVB in yeast, by directly binding ESCRT-0 subunits Hse1/STAM1 and Vps27/HRS.<sup>27</sup> In *Plaa*-null cells, localization of HRS is perturbed, without disruption of endosomal or lysosomal morphology, suggesting that ESCRT-0 function may be disrupted (Figures 2D, 2E, and S3B–S3E). To test the functional integrity of ESCRT-dependent trafficking to the MVB/late endosome in the absence of PLAA, we followed the internalization of epidermal growth factor (EGF) after binding to the EGF Receptor (EGFR), which triggers endocytosis of both receptor and ligand and subsequent ESCRT-dependent trafficking

to the lysosome for degradation. While initial endocytosis of EGF to the early endosome is unaffected in *Plaa*-null cells, it fails to efficiently reach the late endosome, indicating disrupted trafficking from early to late endosomes (Figures 2F and 2G). To allow visualization of distinct endosomal membrane and lumen compartments, we expressed a constitutively active Rab5<sup>Q79L</sup> and followed ligand-induced internalization of EGFR and the neural G protein-coupled receptor (GPCR) δ-Opioid receptor (DOP) into the lumen of the resulting enlarged endosomes.<sup>48</sup> In the absence of PLAA, these receptors/ligands remain trapped at the membrane (Figures 2H–2J, S3F, and S3G). We conclude that loss of mammalian PLAA disrupts ESCRT-0 localization

**Table 1. Summary of Clinical Features in PLAAND**

| Clinical Feature             | Fraction of Affected Individuals Displaying Feature |
|------------------------------|-----------------------------------------------------|
| <b>Development</b>           |                                                     |
| Absent gross motor           | 10/10                                               |
| Absent fine motor            | 10/10                                               |
| Absent social                | 10/10                                               |
| Absent language              | 10/10                                               |
| Cognitive impairment         | 10/10                                               |
| <b>Neurological Findings</b> |                                                     |
| Generalized seizures         | 8/10                                                |
| Central hypotonia            | 8/10                                                |
| Peripheral hypertonia        | 9/10                                                |
| Bulbar symptoms              | 7/10                                                |
| Optic atrophy                | 3/5 <sup>a</sup>                                    |
| Nystagmus                    | 4/9 <sup>b</sup>                                    |
| Progressive microcephaly     | 9/9 <sup>b</sup>                                    |
| <b>Physiological</b>         |                                                     |
| Dorsal edema of hands/feet   | 4/10                                                |
| Dysmorphic facies            | 10/10                                               |

Related to Figure 1.  
<sup>a</sup>Five children died at too early an age to have developed this feature  
<sup>b</sup>One child died at too early an age to have developed this feature

and ubiquitin-dependent internalization of receptors and their ligands into MVB/late endosomes for lysosomal degradation.

### Reduced Levels of PLAA Result in Early-Onset Neural Dysfunction and Premature Lethality

To confirm pathogenicity of the c.68G>T human mutation and to provide an informative model of the human disease, this mutation was introduced into the orthologous mouse gene using CRISPR/Cas9 gene-editing (protein ID: 94%, Figures S4A and S4B). *Plaa*<sup>G23V/G23V</sup> mice have a 70% reduction in PLAA protein levels by western blot (Figure 3A), confirming that the p.Gly23Val variant destabilizes protein structure. In contrast to the embryonic lethality of *Plaa*<sup>-/-</sup> mice, *Plaa*<sup>G23V/G23V</sup> are born at Mendelian ratios indicating this is a viable hypomorphic allele (Table S4). *Plaa*<sup>G23V/G23V</sup> mutants exhibit early-onset neurodysfunction phenotypes, which progressively deteriorate such that 50% of mutants must be culled by 6 months (Figure 3B). Levels of PLAA abundance and/or function are further reduced in *Plaa*<sup>G23V/-</sup> compound heterozygote mice, resulting in accelerated decline with pronounced paralysis and respiratory distress (Figures 3A, 3B, and S4C) and the pups die before weaning (P17–P21 [postnatal day 17–21]; Table S5). *Plaa*<sup>G23V/G23V</sup> brains are smaller than littermates (Figure 3C) and MRI analysis reveals significant reductions in corpus callosum and cerebellar volumes in

*Plaa*<sup>G23V/G23V</sup> brains, similar to the features reported in imaging of the human affected individuals (Figures 1A–1F and 3D and 3E).

Tremor and motor disorders are detectable from P14 in *Plaa*<sup>G23V/G23V</sup> mutants and P7 in *Plaa*<sup>G23V/-</sup> compound mutants, including a range of neuromuscular weakness and hypomotility phenotypes. *Plaa*<sup>G23V/G23V</sup> animals fail to splay hindlimbs when suspended, whereas *Plaa*<sup>G23V/-</sup> mice displaying a more pronounced clasping phenotype (Figure 3F). *Plaa*<sup>G23V/G23V</sup> animals also exhibit reduced grip strength, pronounced kyphosis, and muscle wasting (Figures 3G and S4D).

### PLAA Deficiency Disrupts Purkinje Cell Migration, Dendrite Arborization, and Neurotransmission

Both *Plaa*<sup>G23V/G23V</sup> and *Plaa*<sup>G23V/-</sup> mice display altered gait, disrupted balance, and early-onset postural tremor with kinetic aspect, suggestive of central disturbances in the cerebellar motor circuits relaying information related to muscle coordination and balance (Figures 3H, 4A, and S5D; Movies S1 and S2). This type of tremor has been previously linked to early central synaptic dysfunction in rodents.<sup>51,52</sup> *Plaa* is expressed in the postnatal brain, with highest levels in the CA hippocampal neurons, cerebellar granular cell layer, and Purkinje cells (PCs) (Figure 4B). *Plaa*<sup>G23V/G23V</sup> animals display a significant reduction in cerebellar volume that is more pronounced in *Plaa*<sup>G23V/-</sup> mice, which show additional cerebellar foliation defects (Figures 3E and S5A–S5C). Transcriptome analysis of *Plaa*<sup>G23V/G23V</sup> cerebella revealed decreased expression of PC markers, with parallel increased glial and complement-microglial markers suggesting reactive gliosis (Figures S5E and S5F). Histological and immunofluorescent analysis revealed no reduction in PC density in *Plaa*<sup>G23V/G23V</sup> cerebella (Figures 4C and 4D); instead, PCs fail to form a uniform layer in *Plaa*<sup>G23V/G23V</sup> cerebella, consistent with a defect in migration. *Plaa*<sup>G23V/G23V</sup> PCs also show abnormal dendritic branching (Figures 4E and 4F). Together these results support a role for PLAA during PC development, as opposed to degeneration.

To address how disrupted sorting of Ub-modified cargos may underlie the mutant cerebellar phenotype, we undertook an unbiased whole-proteome analysis of early symptomatic *Plaa*<sup>G23V/G23V</sup> cerebella (aged 3 months). We found no changes in protein levels suggestive of deregulated MAD (i.e., mitochondrial function or turnover) or UPS (i.e., proteasomal subunits) degradation in the absence of PLAA; nor did we find evidence of cell loss (apoptosis). In contrast, all proteins significantly increased in mutant cerebella (>5-fold, FDR < 0.05) were involved in vesicular trafficking (AP4S1, SNAP25, RAB22A, S100A11) or were receptors/ligands trafficked via the endolysosomal pathway (VLDLR, GRN)<sup>53–58</sup> (Figures 4G and 4H). Immunoblot confirmed the upregulation of VLDLR, SNAP25, and AP4S1 (Figures 4H and S5H–S5J), while transcriptional analysis confirmed this upregulation was post-transcriptional (Figure S5G). VLDLR (Very low-density lipid

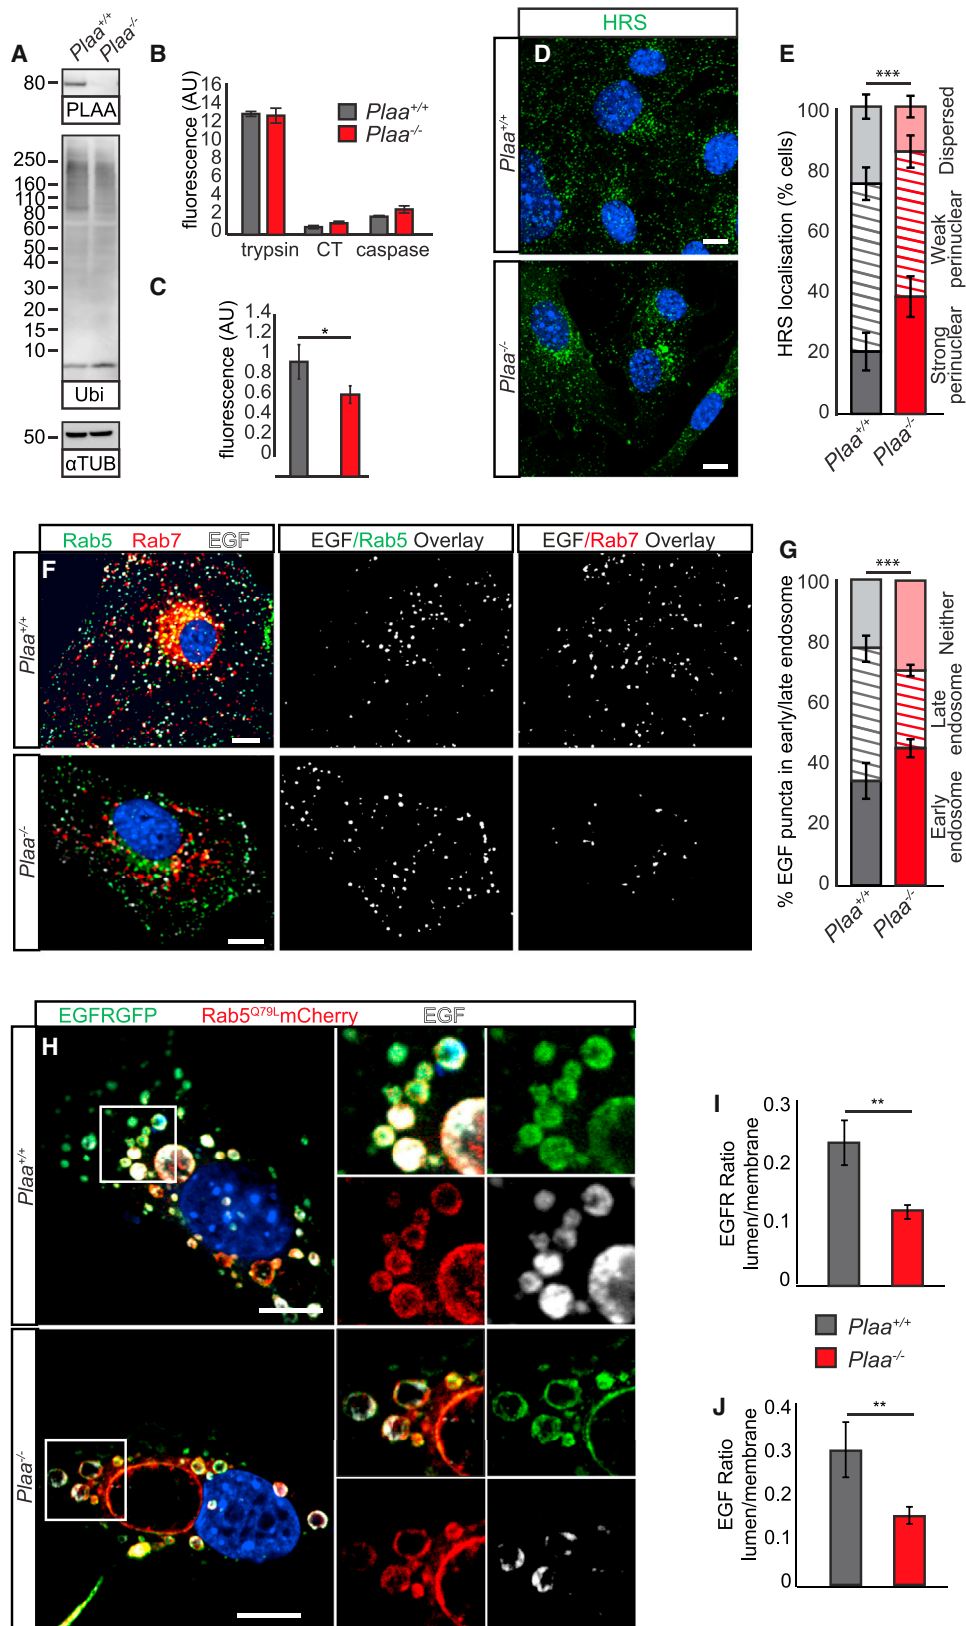

**Figure 2. PLAA Is Required for Trafficking of Integral Membrane Receptors to Late Endosomes in an ESCRT-Dependent Manner**  
 (A) No global changes in polyubiquitin or free ubiquitin levels are detected in *Plaa*<sup>-/-</sup> MEFs.  
 (B) No impairment in tryptic, chemotryptic (CT), or caspase activity in *Plaa*<sup>-/-</sup> MEFs was observed, suggesting that proteasomal activity is not compromised.  
 (C) FACS analysis revealed reduced levels of the UFD reporter *Ub*<sup>G76V</sup>-GFP in *Plaa*<sup>-/-</sup> MEFs, indicating increased UPS flux.

(legend continued on next page)



receptor) is required for cerebellum development and PC migration.<sup>59</sup> The defects in PC migration and dendrite maturation, as well as the ataxia and tremor present in *Plaa*<sup>G23V/G23V</sup> mice may, therefore, result from the accumulation of dysfunctional VLDLR due to disrupted post-endocytic trafficking to the lysosome.

To assess the functional competence of the PCs in *Plaa*<sup>G23V/G23V</sup> cerebella, we performed whole-cell patch-clamp recordings and analyzed spontaneous miniature inhibitory post-synaptic currents (mIPSCs). Reduced amplitude of mIPSCs, with no effect on frequency or decay kinetics, was observed in *Plaa*<sup>G23V/G23V</sup> PCs, consistent with a functional deficit in cerebellar outputs, which may underlie the tremor and cerebellar ataxia observed in these mice (Figures 4I–4K).

### PLAA Is Required for Efficient Synaptic Vesicle Recycling at NMJs

In addition to central defects, the muscle weakness and wasting observed in *Plaa*<sup>G23V/G23V</sup> mice may reflect involvement of the peripheral nervous system. Analysis of *Plaa*<sup>G23V/G23V</sup> neuromuscular junctions (NMJs) revealed that every endplate was fully innervated. However, there were increased numbers of endplates with terminal swellings and/or sproutings, typically a compensatory response to a poorly functioning synaptic terminal<sup>60</sup> (Figures 5A–5E and S6A–S6G). *Plaa*<sup>G23V/G23V</sup> muscle fibers had decreased diameter, consistent with atrophy (Figure S7A). NMJ disruption is detected as early as P14 in *Plaa*<sup>G23V/-</sup> mice (Figures S6D–S6G). While the bulk of the presynaptic swelling is accumulation of neurofilament (NF), increased intensity and number of foci of synaptic vesicle protein 2 (SV2) were clear in *Plaa*<sup>G23V/-</sup> NMJs suggesting a disruption in distribution and/or composition of synaptic vesicles (SV) (Figures 5F–5H and S6D–S6G). Immunoblotting confirmed synaptic accumulation of SV2 with an increased high molecular weight smear in *Plaa* mutants, consistent with disrupted SV2 degradation (Figure 5I). Furthermore, PLAA itself was detected in synaptic preparations, supporting a putative direct function in regulating Ub sorting at the synapse (Figures S5I and S5K).

Indeed, transmission electron microscopy (TEM) of *Plaa*<sup>G23V/G23V</sup> levator auris longus (LAL) NMJs revealed profound decreases in SV numbers with increased enlarged endosomal and vacuolar structures (Figures 5J–5L and S6H). Several pools of SVs exist, including the reserve, recycling, and readily releasable pools, with distinct functional

properties and modes of regeneration, some involving endocytic intermediates.<sup>4</sup> A greater reduction in SVs not tethered at the active zone (perhaps representing the recycling or reserve SVs) was evident in *Plaa*<sup>G23V/G23V</sup> NMJs (Figure 5M), which, together with the presence of prominent enlarged endosomal and vacuolar structures, suggests that Ub-mediated sorting via PLAA is required for efficient SV biosynthesis or recycling.

To scrutinize SV recycling directly, we stained motor nerve terminals in LAL muscles with FM1-43, which selectively labels recycling SVs and other endocytic compartments in an activation-dependent manner. The general innervation pattern appeared normal, suggesting that most terminals recycled vesicles sufficiently to sustain neuromuscular transmission (Figures 6A and 6B). However, about 60% of motor nerve terminals in *Plaa*<sup>G23V/G23V</sup> animals displayed abnormal FM1-43 uptake. This included localized swelling of terminal boutons or punctate/fragmented intense staining, consistent with the presence of enlarged endocytic structures seen by TEM (Figures 6A–6C and 5J and 5K) and suggesting defective coupling of SV fusion and recycling.

Intracellular recordings further revealed that upon nerve stimulation a significant number of *Plaa*<sup>G23V/G23V</sup> NMJs failed to respond or gave intermittent response (Figure 6D). Of the *Plaa*<sup>G23V/G23V</sup> NMJs which responded, EPP (end-plate potential) characteristics appeared normal (Figures S7F–S7I). The mean frequency of spontaneous MEPPs (miniature end-plate potentials) was increased in *Plaa*<sup>G23V/G23V</sup> NMJs, together with an increased half-decay time in some muscle fibers, indicating altered synaptic function in *Plaa*<sup>G23V/G23V</sup> NMJs (Figures 6E, 6F, and S7C–S6E). The incidence of spontaneous MEPPs with amplitudes more than twice the mean (“giant” GMEPPs) was also significantly higher in *Plaa*<sup>G23V/G23V</sup> muscles (Figure 6G). In conclusion, our results suggest that the infantile neurodysfunction is a result of defective SV recycling and synaptic function (Figure 6H).

### Reduction of PLAA Leads to Impaired Trafficking of K63-Ubiquitylated Substrates

To further characterize how intracellular trafficking defects could underlie the phenotypic changes in *Plaa* mutant brains, we investigated whether all polyUb species accumulate as a result of general disruption in degradation or whether specific subset of polyUb substrates are

---

(D and E) HRS (ESCRT-0) is mislocalized to perinuclear accumulations in *Plaa*<sup>-/-</sup> MEFs.

(F and G) In *Plaa*<sup>-/-</sup> MEFs, EGF is internalized and reaches early endosomes (Rab5-GFP) normally, but trafficking to the late endosome (Rab7-RFP) is impaired. Colocalization of EGF and endosome markers are highlighted in white in the center and right images.

(G) Quantification of EGF puncta which colocalize with Rab5-GFP (early endosome), Rab7-RFP (late endosome), or do not localize to either (neither).

(H–J) *Plaa*<sup>-/-</sup> MEFs fail to internalize EGF and its receptor (EGFR-GFP) into the lumen of Rab5<sup>Q29L</sup>-positive enlarged endocytic structures.

(I and J) Quantification of the ratio of receptor or ligand intensity on the membrane versus lumen of the Rab5<sup>Q29L</sup> endosomes.

\**p* < 0.05, \*\**p* < 0.01, \*\*\**p* < 0.001; error bars represent SEM. *n* = 3 WT and *n* = 3 *Plaa*<sup>-/-</sup> MEF lines in (B), (C), (E), and (G); *n* > 200 endosomes from 3 MEF lines per genotype in (I) and (J). Student's *t* test in (C), (I), and (J); Chi squared test in (E) and (G). Scale bars represent 10 μm. See also Figures S2 and S3.

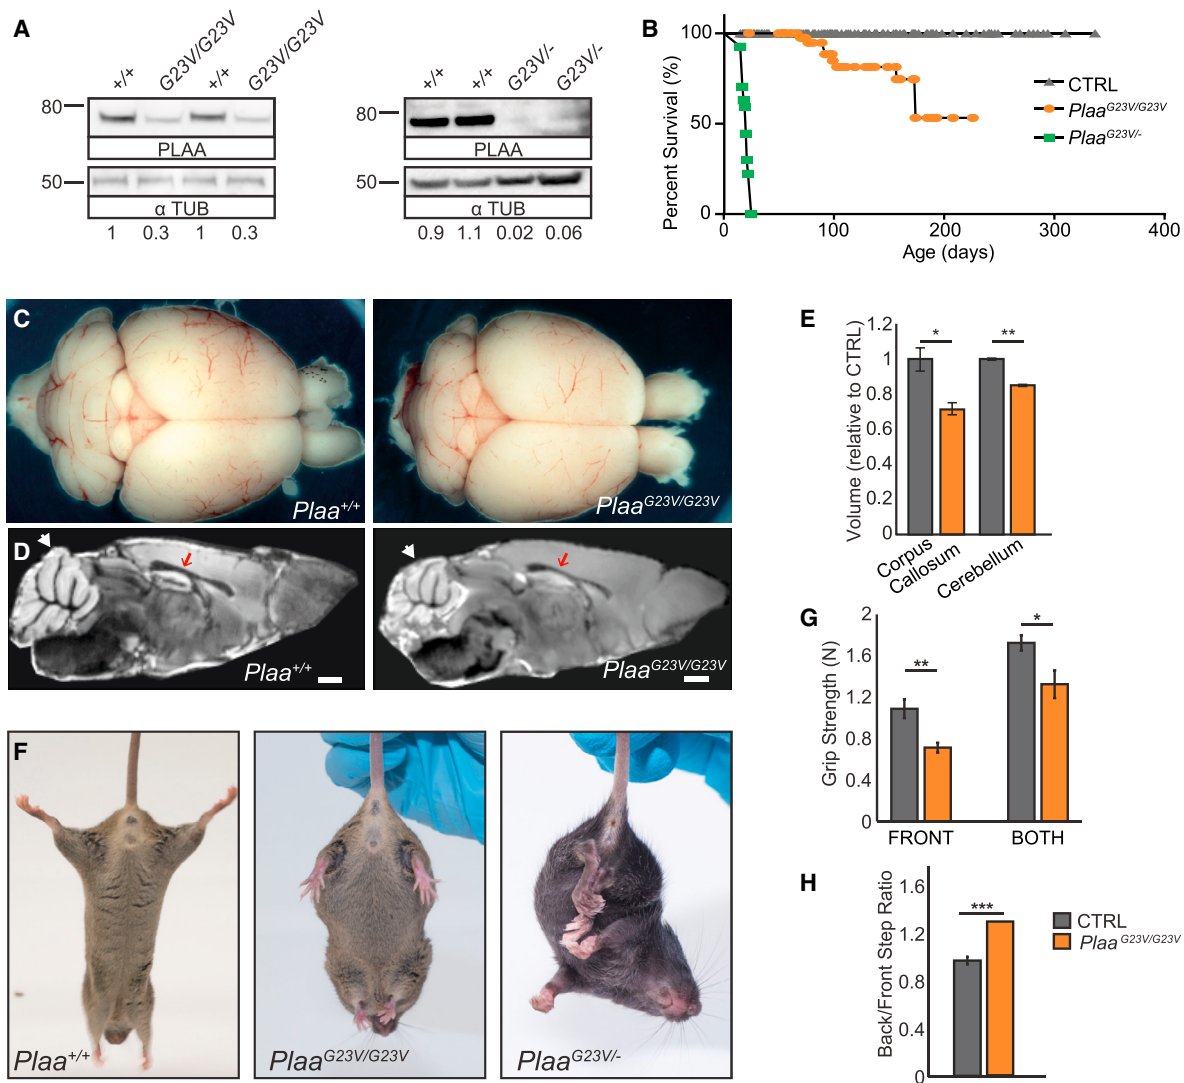

**Figure 3. Reduction of PLAA Levels in Mouse Results in Microcephaly and Early-Onset Neural Dysfunction, Including Early Lethality, Ataxia, and Muscle Weakness**

(A) PLAA protein levels in the cerebellum are reduced to <30% in *Plaa*<sup>G23V/G23V</sup> mutants and <6% in *Plaa*<sup>G23V/-</sup> mutants (densitometry below).  
 (B) Kaplan-Meier survival curve showing 50% of *Plaa*<sup>G23V/G23V</sup> mice have to be culled by 6 months due to severe hindlimb paralysis or balance perturbations. *Plaa*<sup>G23V/-</sup> mice die around weaning due to respiratory distress and paralysis.  
 (C) Gross brain morphology of *Plaa*<sup>G23V/G23V</sup> and *Plaa*<sup>+/+</sup> mice at 3 months.  
 (D and E) Representative sagittal section of MRI from 3-month-old *Plaa*<sup>G23V/G23V</sup> and *Plaa*<sup>+/+</sup> brains, showing reduced cerebellar (white arrow) and corpus callosum (red arrow) volume relative to total brain volume in mutants (D) quantified in (E); n = 3 CTRL (*Plaa*<sup>+/+</sup> or *Plaa*<sup>G23V/+</sup>), n = 3 *Plaa*<sup>G23V/G23V</sup>.  
 (F) *Plaa*<sup>G23V/G23V</sup> and *Plaa*<sup>G23V/-</sup> mice show neurodysfunction in the hindlimb clasp test. Whereas wild-type mice splay their hindlimbs, *Plaa*<sup>G23V/-</sup> mice show a severe hindlimb clasping phenotype and *Plaa*<sup>G23V/G23V</sup> mice display a partial phenotype.  
 (G and H) *Plaa*<sup>G23V/G23V</sup> mice show significantly reduced grip strength and significantly altered gait, resulting in an increase in the ratio of back/front step length, n = 7 CTRL (*Plaa*<sup>+/+</sup> or *Plaa*<sup>G23V/+</sup>) and n = 5 *Plaa*<sup>G23V/G23V</sup>.  
 Scale bars represent 1 mm. Error bars represent SEM, \*p < 0.05, \*\*p < 0.01, \*\*\*p < 0.0001, Student's t test. See also Figure S4.

affected when PLAA function is reduced. Similar to null MEFs, no compensatory changes in UPS subunit levels or UPS flux are observed in *Plaa*<sup>G23V/G23V</sup> cerebella, suggesting no general disruption of Ub-based degradation (Figures S8A and S8B). Using brains from wild-type and *Plaa*<sup>G23V/-</sup> cerebella at P17, we took advantage of recently characterized small recombinant UBDs for binding pan-Ub or with high selectivity to either K63- or K48-linked

polyUb.<sup>61,62</sup> While not readily detectable without enrichment, significant and specific accumulation of K63-polyUb species is observed in *Plaa*<sup>G23V/-</sup> mutant brains while only minor changes in pan-Ub or K48-polyUb modified cargos are seen (Figures 7A and S8C–S8E). This is consistent with a specific primary defect in post-endocytic degradation of ubiquitylated membrane proteins, as K63-polyUb is key for internalization of receptors into

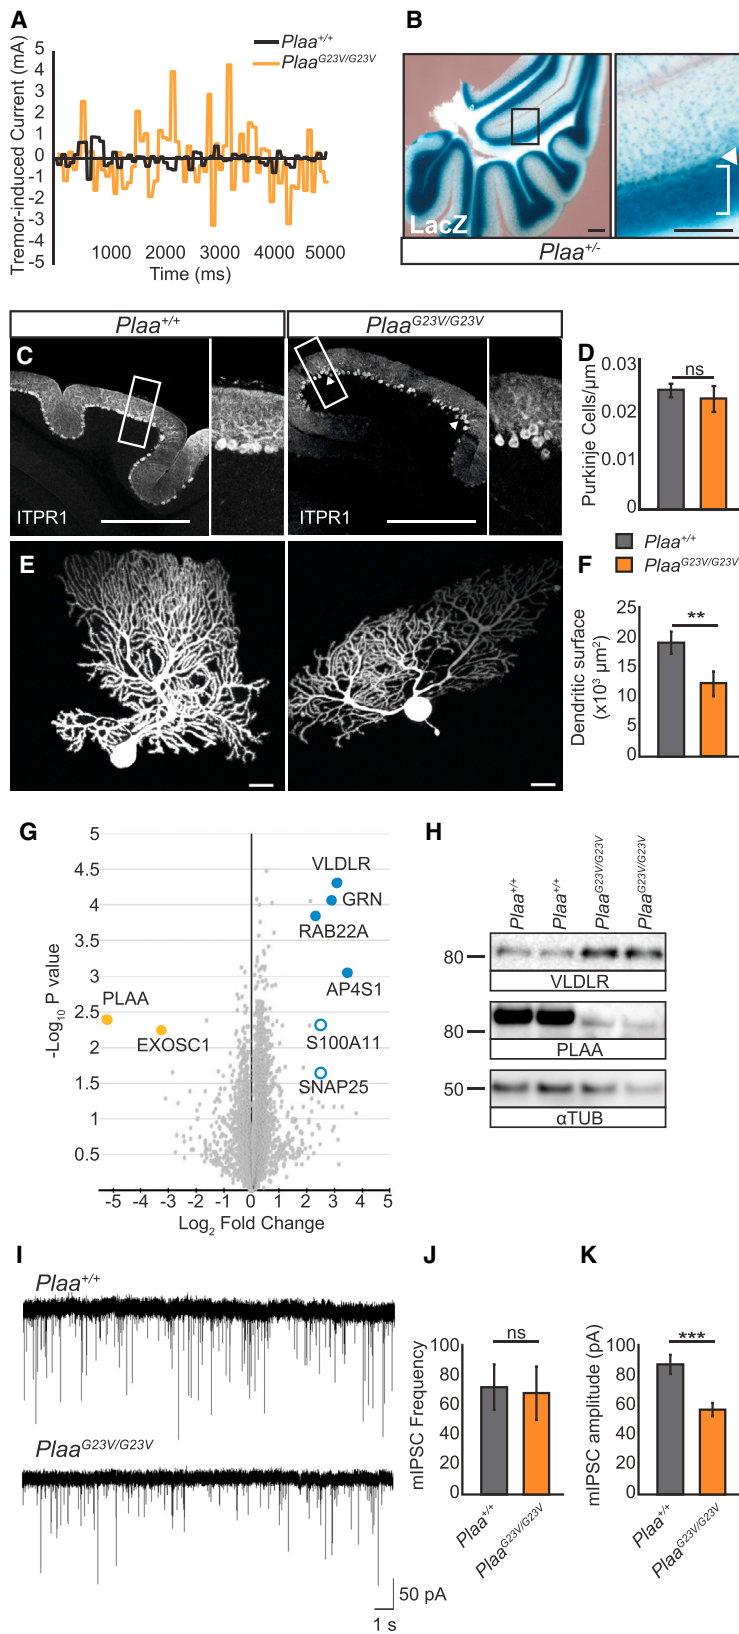

**Figure 4. PLAA Reduction Results in Disrupted Purkinje Cell Migration and Central Synaptic Dysfunction** (A) *Plaa*<sup>G23V/G23V</sup> mice display early-onset kinetic tremor with postural aspect, detectable from before P21.

(B) X-gal staining of *Plaa*<sup>+/-</sup> brains reveal *Plaa* is highly expressed in the cerebellum, in the granular cell (bracket) and Purkinje cell (PC) (arrow) layers.

(C and D) PCs (marked by anti-ITPR1) are disorganized in *Plaa*<sup>G23V/G23V</sup> cerebella indicating disrupted PC migration although total PC density remains unchanged.

(E and F) Dye filling of PCs reveals *Plaa*<sup>G23V/G23V</sup> PCs show reduced dendritic branching, resulting in reduced dendritic surface (quantified in F) (n = 8 cells from 4 WT mice, n = 7 cells from 4 *Plaa*<sup>G23V/G23V</sup> mice).

(G) Summary of total proteome mass spectrometry analysis of *Plaa*<sup>+/+</sup> and *Plaa*<sup>G23V/G23V</sup> cerebella with the most statistically significant differentially expressed proteins highlighted with larger circles (blue = upregulated in *Plaa*<sup>G23V/G23V</sup>, orange = downregulated, filled circle: FDR < 0.05 t test significant, open circle: Student's t test significant).

(H) Immunoblot confirmation of VLDLR upregulation in *Plaa*<sup>G23V/G23V</sup> cerebella.

(I–K) Patch clamp recordings from PCs reveal normal frequency but reduced amplitude of mIPSCs in *Plaa*<sup>G23V/G23V</sup> mice (quantified in J and K); n = 13 cells from 3 mice for each genotype.

Scale bars represent 500 µm in (B) and (C) or 20 µm in (D). Error bars represent SEM; ns, not significant, \*\*p < 0.01, \*\*\*p < 0.001, Student's t test. See also Figure S5.

in age-related proteotoxic neurodegeneration resulting from compromised UPS.

As p62 binds polyubiquitylated proteins, preferentially to K63-linked species and targets them for degradation via the autophagy pathway, we tested presence of p62 in a capture of K63-polyUb.<sup>66,67</sup> Interestingly, we see increased binding of the autophagy adaptor p62 to these accumulated K63-linked polyUb-modified proteins in *Plaa*<sup>G23V/-</sup> cerebella (Figures 7A and 7B). Furthermore, the number of p62 foci was increased in *Plaa*-null cells (Figures 7C and 7D), colocalizing with aberrantly localized HRS-positive endocytic structures (Figures 7E and S8G). To assay whether the accumulation of p62 foci is a result of disrupted flow through autophagy intermediates, we used the reporter GFP-RFP-LC3 in *Plaa*<sup>-/-</sup> cells. This reporter allows the concomitant assessment of the total autophagosome pool size before and after fusion as this tandem tagged reporter labels autophagosomes (RFP<sup>+</sup> and GFP<sup>+</sup>) as well as autophagolysosomes (RFP<sup>+</sup>; GFP<sup>-</sup> due to pH sensitivity of GFP). *Plaa*<sup>-/-</sup> cells show an overall increase in the

pool size of both LC3-positive structures, but no change in the ratio of autophagosomes (yellow) to autophagolysosomes (red) (Figures S8F and S8H–S8J). This suggests that in the absence of PLAA, there is an increase in basal

pool size of both LC3-positive structures, but no change in the ratio of autophagosomes (yellow) to autophagolysosomes (red) (Figures S8F and S8H–S8J). This suggests that in the absence of PLAA, there is an increase in basal



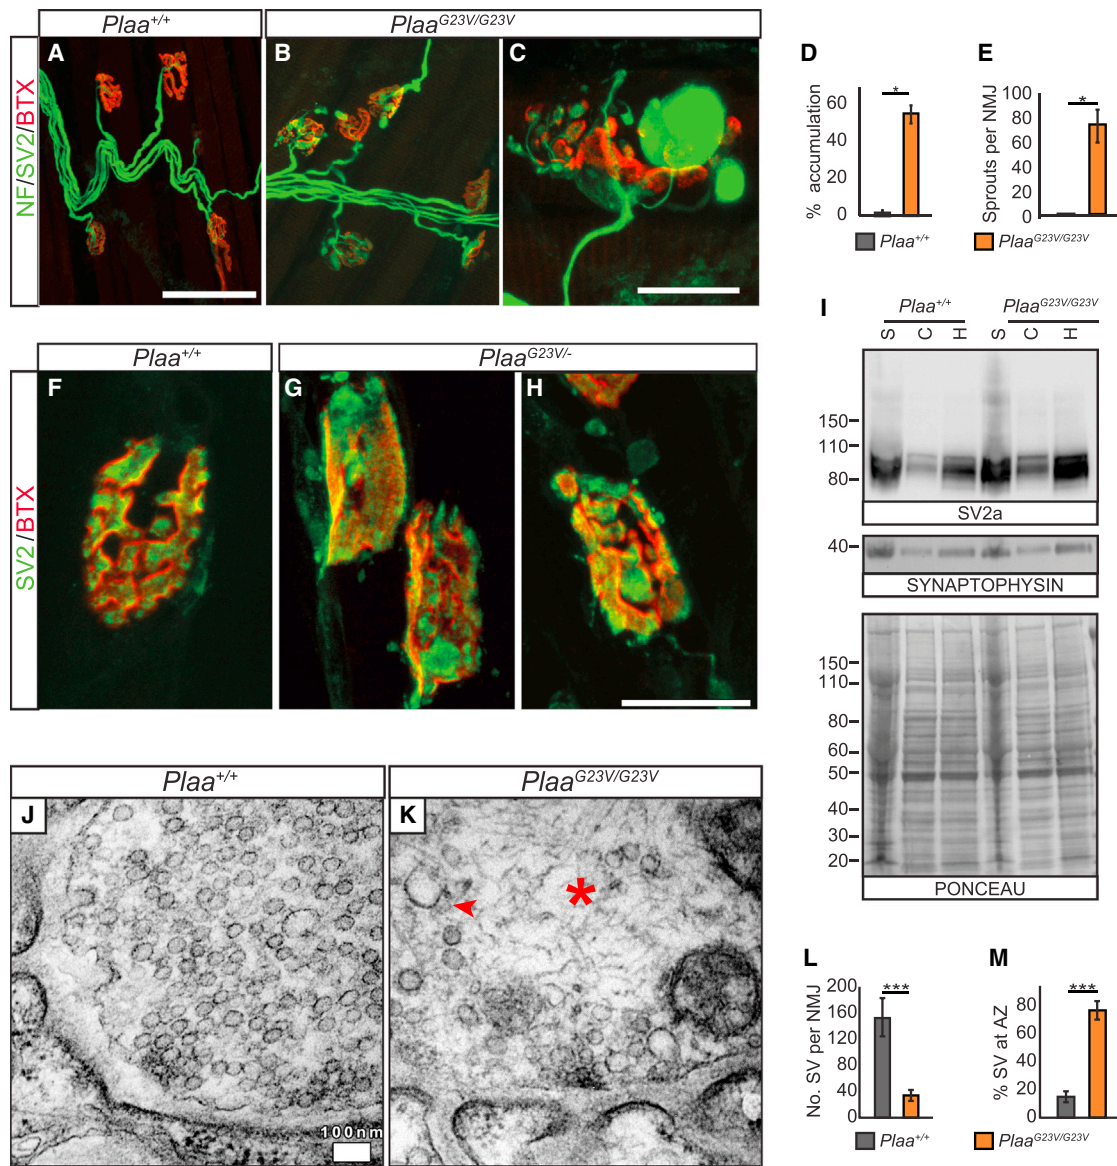

**Figure 5. PLAA Reduction Results in Disrupted SV2 Degradation and Reduced Synaptic Vesicles**  
 (A–E) NMJs on LAL muscles in 3-month-old *Plaa*<sup>G23V/G23V</sup> mice show striking pre-synaptic swellings (quantified in D) or sprouting (quantified in E). Mann-Whitney U test, n = 3 mice per genotype; scale bar represents 60 μm in (A) and (B), 18 μm in (C). Error bars represent SEM.  
 (F–H) *Plaa*<sup>G23V/-</sup> NMJ at P15 show abnormal accumulations of SV2 (green) compared to controls. Scale bar represents 18 μm.  
 (I) Synaptic preps from cerebella show SV2 levels are increased in *Plaa*<sup>G23V/G23V</sup> mutants (S, synaptic; C, cytoplasmic; H, homogenate).  
 (J–M) Transmission electron microscopy of synaptic boutons on LAL muscles from 3-month-old *Plaa*<sup>+/+</sup> (J) and *Plaa*<sup>G23V/G23V</sup> (K) mice, quantified in (L) and (M). Scale bar represents 100 nm. Mutant synaptic boutons have reduced SV numbers (L), with the reduction more pronounced in the reserve pool and remaining SVs limited to periphery close to active zones (AZ) (M). *Plaa*<sup>G23V/G23V</sup> synapses show structured neurofilament accumulations (asterisk) and prevalent abnormal large endosomal structures are evident (arrowhead).  
 Abbreviations are as follows: NF, neurofilament; SV2, Synaptic vesicle 2; BTX, Bungarotoxin. \*p < 0.05, \*\*p < 0.01, \*\*\*p < 0.001. See also Figure S6.

autophagy without clear defects in fusion events. Reducing PLAA function impairs endolysosomal trafficking, which could trigger p62 recruitment to accumulating K63-linked polyUb proteins on endosomes. We suggest that p62 attempts to reroute this cargo for autophagic clearance, but this rerouting via selective autophagy is much less efficient and/or compromised such that reduction in PLAA disrupts ubiquitin-dependent signaling events key for neural development and synaptic function.

## Discussion

### PLAA Is Essential for Post-Endocytic Degradation of K63-Ubiquitylated Cargo

The functional outcome of ubiquitylation is determined by how ubiquitin signals are interpreted by a large number of ubiquitin binding domain proteins, vastly increasing the potential biological applications for this post-translational modification (PTM). However, this complicates assigning



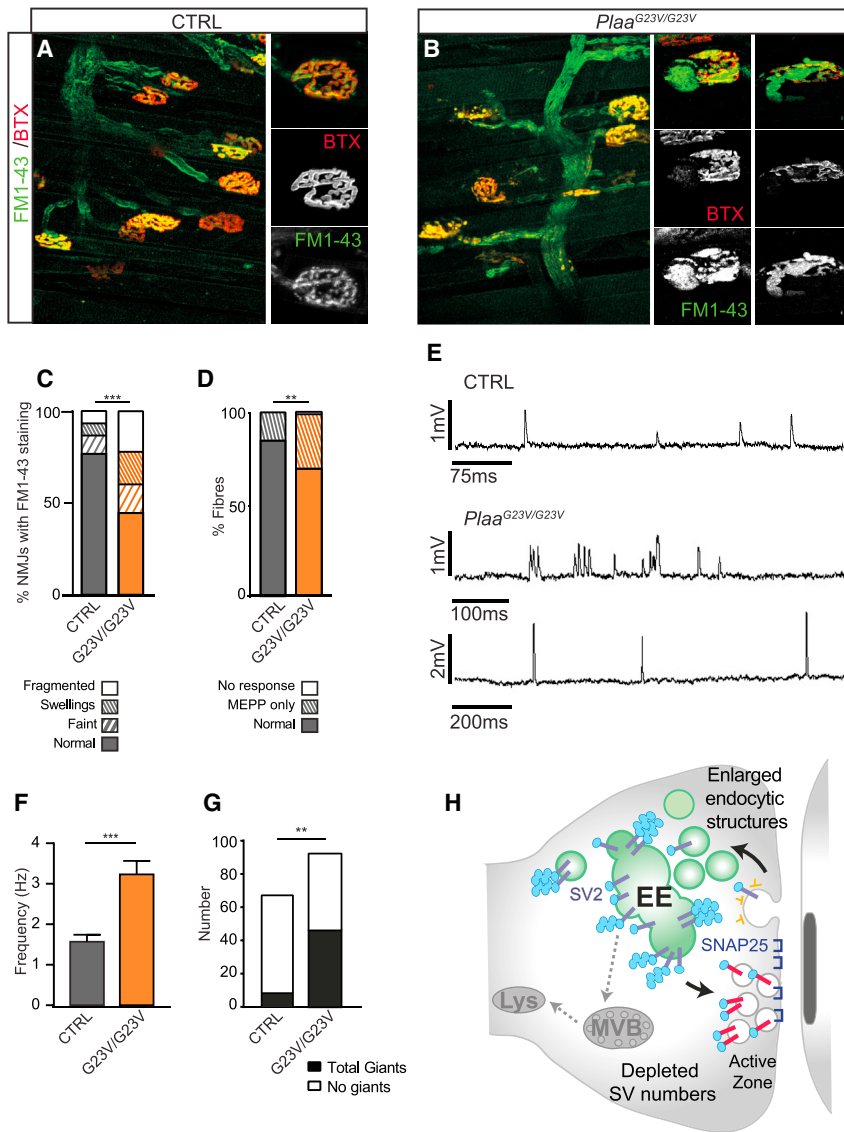

**Figure 6. SV Trafficking and Neurotransmission Is Disrupted in *Plaa* Mutant NMJs**

(A–C) Motor nerve terminals in LAL muscles from 7-month-old mice were vitally stained with FM1-43. Defects are quantified in (C),  $n = 2$  control ( $Plaa^{+/G23V}$ ) and  $n = 4$   $Plaa^{G23V/G23V}$  Chi squared test.

(D) Nerve-evoked endplate potentials (EPPs) recordings showed that roughly 40% of LAL mutant fibers failed to respond. Filled bar, response to stimulation; hatched bar, no response to stimulation but spontaneous miniature endplate potentials (MEPPs) present; unfilled bar, no response to stimulation or MEPPs.  $n = 2$  control ( $Plaa^{G23V/+}$ ) and  $n = 4$   $Plaa^{G23V/G23V}$ , Fisher's exact test.

(E) MEPPs occurred in many  $Plaa^{G23V/G23V}$  NMJs at abnormally high frequency.

(F) Student's t test.

(G) The incidence of spontaneous MEPPs with amplitudes more than twice the mean ("giant" MEPPs) was also significantly higher in  $Plaa^{G23V/G23V}$  NMJs from LAL.  $n = 2$  control ( $Plaa^{G23V/+}$ ) and  $n = 4$   $Plaa^{G23V/G23V}$  (10–30 fibers sampled per muscle), Chi squared.

(H) Summary model depicting how disruption of ubiquitin signaling impairs endolysosomal trafficking of synaptic membrane proteins in *Plaa* mutant neurons, leading to reduced synaptic vesicle numbers and altered neurotransmission. See also Figure S7.

specific functions to widely expressed adaptor proteins like PLAA/Ufd3/Doa1, which have multiple distinct UBDs and no catalytic activity. Indeed, the yeast ortholog Ufd3 has been implicated in protein quality control through diverse Ub-based sorting mechanisms, many of which involve interaction with p97/VCP segregase, including ERAD, UPS, and MAD.<sup>21,25</sup> Unlike in yeast, loss of mammalian PLAA does not affect levels of free ubiquitin, nor do we detect accumulation of high-molecular-weight polyUb species associated with impaired UPS- or mitochondrial-associated degradation, which are frequently associated with neurodegeneration. In yeast, Doa1 has been linked to ribophagy, starvation-induced degradation of the 60S ribosome.<sup>26</sup> Recently mammalian PLAA, together with VCP/p97, has been implicated in stress granule assembly, mRNA-protein aggregates that form during translational disassembly induced during stress,<sup>18</sup> as well as lysophagy, which involves the clearance of damaged lysosomes by autophagy.<sup>68</sup> However, these studies focused on the role of PLAA in response to various cell stressors, so any homeo-

static role of PLAA, for example during development, remained unclear. In this study we demonstrate a conserved role for mammalian PLAA in Ub-mediated trafficking of membrane proteins through the endolysosomal pathway. We demonstrate that PLAA is essential for mammalian embryonic development.  $Plaa^{G23V/G23V}$  mice (homozygous for the human mutation in families A–C) survive past weaning, so we conclude that PLAAND-affected individuals possess hypomorphic *PLAA* mutations, as we would not expect null mutations to be compatible with life. The c.68G>T (p.Gly23Val) missense mutation introduces steric clashes in the WD40 ubiquitin binding domain, which destabilizes PLAA protein. Whether this additionally disrupts ubiquitin binding, directly leading to defects in ubiquitin-based trafficking, was not addressed; the significant reduction in protein levels probably accounts for the defects observed, including slowed removal of target proteins from membranes leading to the observed K63 accumulation. The c.68dupG (p.Leu24Profs\*55) insertion is in exon 1 of *PLAA* and so may escape nonsense-mediated decay,<sup>69</sup> it is possible that translation begins at the downstream methionine (Met58), which would result in a N-terminally truncated PLAA protein, missing part of the WD40 propeller, which would likely also be highly destabilizing.

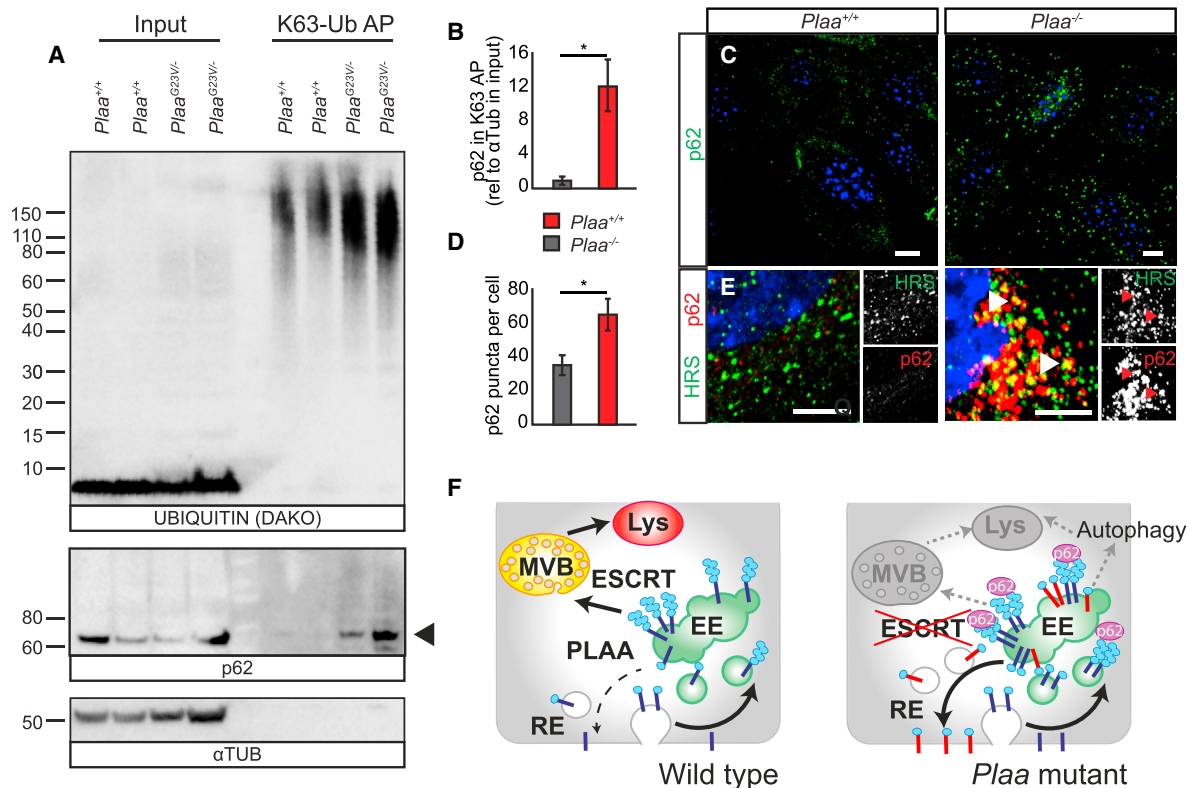

**Figure 7. Reduction of PLAA Leads to Impaired Trafficking of K63-polyUb Substrates**

(A and B) Affinity purification of P17 cerebellar lysates using the K63-specific UBD (EPS15) revealed a significant accumulation of K63-ubiquitylated proteins in *Plaa*<sup>G23V/-</sup> mutants. Blot representative of *n* = 3 animals per genotype. Reduction of PLAA leads to increased binding of p62 to these increased K63-ubiquitylated substrates (quantified in B).

(C–E) *Plaa*<sup>-/-</sup> MEFs show significant increase in p62 foci (quantified in D), some of which colocalizes with mislocalized HRS (E) (see Figure S7G for zoomed out image). Scale bars represent 10  $\mu$ m.

Error bars represent SEM; ns: not significant, \**p* < 0.05, Student's *t* test.

(F) Schematic representation of PLAA-dependent trafficking defects through the endolysosomal system. PLAA is required for sorting of Ub-modified membrane proteins into the lumen of MVB/late endosomes. Cargos become trapped on limiting membranes of abnormal early endosome intermediates in *Plaa* mutants where they are concentrated by p62 adaptor protein for alternate lysosomal degradation via autophagy. Alternately these proteins targeted for degradation may be re-routed via the recycling endosomes to the cell surface where they may be functionally compromised (red). See also Figure S8.

After this manuscript was submitted, Zaccai et al.<sup>70</sup> published a missense c.2254C>T mutation in human *PLAA* resulting in a non-destabilizing p.Leu752Phe change in the PUL domain, causing a similar but milder clinical phenotype, which they diagnosed as leukoencephalopathy. While their emphasis among their older cohort was on white matter abnormality, the affected individuals we describe in this study, who are younger in comparison, also have evidence of white matter involvement (i.e., delayed myelination). It is conceivable that had they survived, they may have progressed to a comparable level of leukodystrophy. Using our allelic series of mouse mutants, we demonstrate a strongly dose-dependent requirement for functional PLAA in neuronal function, brain development, and viability. Together, these data support use of the unifying term PLAA-associated neurodevelopmental disorder (PLAAND), which covers the phenotypic spectrum of human neurological disease resulting from different *PLAA* mutations. While the Zaccai paper focused

on misregulation of Phospholipase A2 activity and subsequent disruption of downstream Prostaglandin E<sub>2</sub> induction as causative,<sup>70</sup> we see no alteration in Phospholipase A2 (PLA2) activity in our most severely affected *Plaa* mutant brains (Figure S9).

We show that PLAA is required for ubiquitin-dependent trafficking of receptors from early to late endosomes/MVBs. In neurons, reducing PLAA function disrupts synaptic structure and synaptic vesicle recycling, resulting in impaired synaptic function, as demonstrated by electrophysiology and gross phenotypes (tremor, ataxia, neuromuscular weakness). We suggest that many of these phenotypes are due to disrupted ESCRT-mediated endocytic sorting. Indeed, a spontaneous destabilizing mutation in ESCRT-0 component *Hrs*, *teetering* (*Hrs*<sup>tm/tm</sup>), results in early-onset neuromuscular weakness and hypokinesia as observed in *Plaa*<sup>G23V/G23V</sup> mice, with accumulations of ubiquitylated synaptic proteins and disrupted SV recycling.<sup>19</sup>

Consistent with a conserved role for PLAA in ESCRT-dependent targeting of ubiquitylated membrane receptors for lysosomal degradation, we see accumulation of K63-Ub proteins in *Plaa* mutant brains. K63-linked Ub chains are thought to be required for internalization into the MVB lumen and, accordingly, ESCRT-0 proteins show preferential binding affinity to K63-Ub chains.<sup>63,65</sup> Accumulation of K63-ubiquitylated cargo has been reported in late-onset neurodegenerative disorders such as Huntington disease (MIM: 143100).<sup>71</sup> We detect an accumulation of a subset of K63-ubiquitylated proteins in mutant cerebella in mice as young as P17. The very early-onset neural dysfunction (evident from birth in human and at least P7 in mouse) is distinct from classical neurodegeneration, characterized by age-related aggregation or cellular inclusions of ubiquitylated proteins.<sup>72,73</sup> This implicates PLAA-directed K63-ubiquitin trafficking in neuronal development. The abnormal Purkinje cell (PC) migration, dendritic tree morphology, and impaired VLDLR degradation we see in *Plaa* mutant mice is consistent with disrupted neuronal development. VLDLR is known to undergo ubiquitin-dependent endolysosomal degradation in response to Reelin signaling, where it controls PC migration.<sup>57,59</sup> Moreover, human mutations in *VLDLR* (MIM: 192977) are found in affected individuals with cerebellar ataxia and intellectual disability<sup>74</sup> (MIM: 224050). Interestingly, at the top of our unbiased total proteomic analysis of *Plaa* mutant cerebella were several proteins encoded by human neurological disease genes with phenotypes overlapping with PLAAND (4 out of the top 6: *SNAP25* [MIM: 616330], *VLDLR* [MIM: 224050], *AP4S1* [MIM: 614706], and *GRN* [MIM: 614706]), suggesting that Reelin signaling is unlikely to be the only signaling pathway disrupted upon PLAA reduction.

As well as targeting proteins for lysosomal degradation through the endosomal pathway, K63-Ub chains have been implicated in autophagy-mediated lysosomal degradation, through autophagy adaptor protein p62, which shows binding preference for K63-Ub chains.<sup>66,67</sup> It has recently been proposed that PLAA, together with VCP/p97, is recruited to damaged lysosomes to promote lysophagy, downstream of K63-linked polyUb and p62.<sup>68</sup> Our results are consistent with the proposal that PLAA acts downstream of p62 and K63-Ub in rerouting cargo, but we do not see evidence of lysosomal damage, nor defects in autophagolysosome fusion in *Plaa* mutants. Instead, *Plaa*-null cells display a marked increase in p62 foci, colocalizing with aberrant HRS-positive endosomal structures. We propose that p62 attempts to consolidate and reroute K63-ubiquitylated cargo trapped at the endosome to the lysosome via the autophagy pathway. Increasing autophagy pharmacologically or genetically can ameliorate neurodegenerative conditions such as ALS (MIM: 105400), Huntington, and Parkinson disease (MIM: 168600),<sup>75,76</sup> raising the possibility that pharmacomodulation of autophagy could also be a therapeutic option for early synaptic dysfunction observed in PLAAND and related disorders.

### PLAA Regulates Sorting of Synaptic Membrane Proteins Necessary for Synaptic Function

In addition to regulating neuronal signaling during brain development, PLAA-dependent ubiquitylated cargo sorting is required for synaptic structure and function. SVs undergo repeated cycles of exocytosis, endocytosis, and vesicle reformation: they are in essence specialized cycling endosomes. In order to maintain their precise identity, specific mechanisms must enable the sorting of SV proteins during recycling to preserve their composition and target old or damaged proteins for degradation. Our studies identify ubiquitin-mediated sorting of synaptic membrane components by PLAA as an essential feature of both central and peripheral synapses.

Ubiquitin has been shown previously to play a key role in synaptic development,<sup>77–79</sup> but these studies focused on the importance of regulating levels of ubiquitin locally at the synapse. Synapses are particularly vulnerable to fluctuations of ubiquitin levels as ubiquitin is synthesized at a distance in the cell body and slowly moved by axonal transport to the synapse.<sup>80</sup> The levels of ubiquitin at the synapse reflect a balance of distant synthesis with local degradation by the proteasome. This degradation is monitored by proteasome-associated DUBs like USP14, which trim polyUb chains prior to degradation of conjugated substrates to maintain free ubiquitin levels. Unlike *Usp14* mutants that show disturbances in ubiquitin homeostasis at the synapse,<sup>79,81</sup> *Plaa* mutants show no perturbation in synaptic-free ubiquitin levels but still have pronounced disruption of activation-based endocytosis, SV numbers, and synaptic membrane protein content. We argue that these observations support a primary role for ubiquitin signaling in endosomal sorting at synapses, which is necessary for synaptic plasticity. Importantly, it further suggests that neurodysfunction need not arise from deregulated synaptic proteostasis via the ubiquitin-proteasome system, but instead through disruptions to the endolysosomal degradative route.<sup>17,82,83</sup> Independent support for this comes from recent extensive quantitative proteomics studies demonstrating that Ub-mediated degradation of the majority of synaptic proteins is not by the proteasome, but via an alternate route.<sup>20</sup>

Without signs of denervation or neuron loss, clear presynaptic changes occur in *Plaa* mutant neuromuscular junctions (NMJs). A reduction in SVs, particularly those not at the active zone, which may represent the reserve and/or recycling pool, is accompanied by accumulation of enlarged endocytic structures. The abnormal trafficking and accumulations of endocytic dye FM1-43, which marks recycling SVs, demonstrates that although initial endocytosis is not dependent on PLAA, subsequent sorting during recycling is. SV component SV2 accumulates in *Plaa* mutant synapses, suggesting that its selective degradation is impaired. Functional synaptic defects observed at mutant NMJs are consistent with a presynaptic defect where docked vesicles of variable sizes compared to controls are found. Indeed, the occurrence of giant miniature



endplate potentials (GMEPPs) has been suggested to represent constitutive neurotransmitter release via endosome structures at the synapse.<sup>84</sup> The occurrence of GMEPPs, together with increased MEPP frequency, is also observed in synapses lacking SNAP25, which is misregulated in *Plaa* mutant synapses.<sup>5</sup>

There is some evidence that a ubiquitin-based sorting mechanism may operate within an endosome intermediate at synapses to regulate the molecular composition and functionality of SV. Active zone proteins Bassoon and Piccolo control SV protein turnover, including SNAP25 and SV2, by restricting local activity of the E3 ligase SIAH1. Depletion of these components in hippocampal neurons leads to increased endolysosomal structures and accelerated degradation of SV components.<sup>85</sup> In *skywalker* mutant flies, excessive endosomal SV recycling and accelerated clearance of Ub-tagged SV proteins leads to increased numbers of super-functional “rejuvenated” SVs.<sup>86,87</sup> Too much activity results in neurodegeneration which can be rescued by mutating components of the ESCRT<sup>87</sup> or VPS C/HOPS complex,<sup>86</sup> indicating that enhanced targeting of SV cargos for lysosomal degradation underlies the *skywalker* phenotype. Human ortholog *TBC1D24* (MIM: 613577) is mutated in DOOR syndrome (MIM: 220500), where affected individuals have early-development seizures and neurological involvement including optic atrophy and MRI abnormalities.<sup>88,89</sup> This GTPase activating protein negatively regulates the SV-associated RAB35, which associates with ESCRT-0 HRS in an activity-dependent manner to stimulate endolysosomal degradation of a subset of synaptic membrane proteins, including SV2 and SNAP25.<sup>1,87</sup> This suggests that turnover of different SV proteins is differentially regulated and probably involves specific ubiquitin-adaptors (as well as Rabs). Our study is the first ubiquitin adaptor protein to be directly linked to this process. We propose that PLAA plays a key role in recognizing Ub-modified, likely K63-modified, SV components and targeting them for ESCRT-dependent degradation via the MVB. The precise nature and kinetics of the ubiquitin code being read on specific SV cargos during vesicle recycling remains to be addressed: is it linkage specific or do additional domains exist on modified cargos that are read by adaptors like PLAA? Intriguingly, endogenous mammalian PLAA was recently shown to bind multiple ubiquitin chains, including K63 and K48 in a cell type-dependent manner, possibly due to cell type-specific PTMs or differentially expressed adaptor proteins.<sup>90</sup> PLAA was also found to bind to poorly characterized ubiquitin linkages K6, K11, and K29 whose roles in neural biology and synaptic function are currently unknown. As improved tools to study these atypical chains *in vivo* are developed, the complexities of the ubiquitin code in neural biology can be unpicked.

This study demonstrates a critical role for ubiquitin signaling in synaptic function by directing turnover of synaptic membrane proteins locally via the endolysosome. Critically, from a therapeutic perspective better understanding

of how ubiquitin signals regulate the fate of SV cargo could lead to the development of small molecule ubiquitin signaling modulators to enhance (in PLAAND-affected individuals) or suppress (in DOOR-affected individuals) SV component turnover, rescuing synaptic function and minimizing neuronal loss.

### Accession Numbers

Transcriptomic microarray data are available from GEO: GSE74735. Total proteomic data are available via ProteomeXchange: PXD003140.

### Supplemental Data

Supplemental Data include nine figures, nine tables, two movies, and a Supplemental Note of extended clinical descriptions and can be found with this article online at <http://dx.doi.org/10.1016/j.ajhg.2017.03.008>.

### Acknowledgments

We thank the families and clinicians for their involvement and participation; D. Fitzpatrick and A. Jackson for commenting on the manuscript and helpful discussions; the IGMM core services and NIHR Cambridge Biomedical Research Centre for support; the IGMM imaging facility and C. Nicol for assistance with imaging and image analysis; the IGMM animal facility for advice and technical assistance; and Mais Hashem for her help in study recruitment as a clinical research coordinator. This work was supported by core funding from the MRC (MC\_UU\_12018/26 to E.A.H., G.R.M., and P.M.; MC\_PC\_U127527200 to P.B., M.A.K., L.M., R.L.M., and I.J.J.; and MC\_UU\_12016/6 to Y. Kulathu and Y. Kristaryanto), MRC MICA grant (to M.S.N.), Muscular Dystrophy Association (MDA294433) (to L.M.M.), Science Foundation Ireland (13/SIRG/2174) (to A.G.-M. and A.v.K.), NIHR Cambridge BRC 2012 (to C.G.W.), MRC, Wellcome, and WellChild (to E.R.M.), and King Salman Center for Disability Research (to F.S.A.).

Received: January 1, 2017

Accepted: March 17, 2017

Published: April 13, 2017

### Web Resources

Ensembl Genome Browser, <http://www.ensembl.org/index.html>  
ExAC Browser, <http://exac.broadinstitute.org/>  
FungiDB, <http://fungidb.org/fungidb/>  
GenBank, <http://www.ncbi.nlm.nih.gov/genbank/>  
ImageJ, <https://imagej.nih.gov/ij/>  
Mouse Genome Informatics, <http://www.informatics.jax.org/>  
OMIM, <http://www.omim.org/>  
ProteomeXchange, <http://www.proteomexchange.org/>  
PyMOL, <http://www.pymol.org>  
RCSB Protein Data Bank, <http://www.rcsb.org/pdb/home/home.do>

### References

1. Sheehan, P., Zhu, M., Beskow, A., Vollmer, C., and Waites, C.L. (2016). Activity-dependent degradation of synaptic vesicle



- proteins requires Rab35 and the ESCRT pathway. *J. Neurosci.* *36*, 8668–8686.
2. Popovic, D., Vucic, D., and Dikic, I. (2014). Ubiquitination in disease pathogenesis and treatment. *Nat. Med.* *20*, 1242–1253.
  3. Hicke, L., Schubert, H.L., and Hill, C.P. (2005). Ubiquitin-binding domains. *Nat. Rev. Mol. Cell Biol.* *6*, 610–621.
  4. Rizzoli, S.O., and Betz, W.J. (2005). Synaptic vesicle pools. *Nat. Rev. Neurosci.* *6*, 57–69.
  5. Washbourne, P., Thompson, P.M., Carta, M., Costa, E.T., Mathews, J.R., Lopez-Bendito, G., Molnár, Z., Becher, M.W., Valenzuela, C.F., Partridge, L.D., and Wilson, M.C. (2002). Genetic ablation of the t-SNARE SNAP-25 distinguishes mechanisms of neuroexocytosis. *Nat. Neurosci.* *5*, 19–26.
  6. Jeans, A.F., Oliver, P.L., Johnson, R., Capogna, M., Vikman, J., Molnár, Z., Babbs, A., Partridge, C.J., Salehi, A., Bengtsson, M., et al. (2007). A dominant mutation in Snap25 causes impaired vesicle trafficking, sensorimotor gating, and ataxia in the blind-drunk mouse. *Proc. Natl. Acad. Sci. USA* *104*, 2431–2436.
  7. Shen, X.M., Selcen, D., Brengman, J., and Engel, A.G. (2014). Mutant SNAP25B causes myasthenia, cortical hyperexcitability, ataxia, and intellectual disability. *Neurology* *83*, 2247–2255.
  8. Serajee, F.J., and Huq, A.M. (2015). Homozygous mutation in synaptic vesicle glycoprotein 2A gene results in intractable epilepsy, involuntary movements, microcephaly, and developmental and growth retardation. *Pediatr. Neurol.* *52*, 642–6.e1.
  9. Crowder, K.M., Gunther, J.M., Jones, T.A., Hale, B.D., Zhang, H.Z., Peterson, M.R., Scheller, R.H., Chavkin, C., and Bajjalieh, S.M. (1999). Abnormal neurotransmission in mice lacking synaptic vesicle protein 2A (SV2A). *Proc. Natl. Acad. Sci. USA* *96*, 15268–15273.
  10. Patrick, G.N. (2006). Synapse formation and plasticity: recent insights from the perspective of the ubiquitin proteasome system. *Curr. Opin. Neurobiol.* *16*, 90–94.
  11. Speese, S.D., Trotta, N., Rodesch, C.K., Aravamudan, B., and Broadie, K. (2003). The ubiquitin proteasome system acutely regulates presynaptic protein turnover and synaptic efficacy. *Curr. Biol.* *13*, 899–910.
  12. Aravamudan, B., and Broadie, K. (2003). Synaptic *Drosophila* UNC-13 is regulated by antagonistic G-protein pathways via a proteasome-dependent degradation mechanism. *J. Neurobiol.* *54*, 417–438.
  13. Yao, I., Takagi, H., Ageta, H., Kahyo, T., Sato, S., Hatanaka, K., Fukuda, Y., Chiba, T., Morone, N., Yuasa, S., et al. (2007). SCRAPPER-dependent ubiquitination of active zone protein RIM1 regulates synaptic vesicle release. *Cell* *130*, 943–957.
  14. Chen, H., Polo, S., Di Fiore, P.P., and De Camilli, P.V. (2003). Rapid Ca<sup>2+</sup>-dependent decrease of protein ubiquitination at synapses. *Proc. Natl. Acad. Sci. USA* *100*, 14908–14913.
  15. Ciechanover, A. (2003). The ubiquitin proteolytic system and pathogenesis of human diseases: a novel platform for mechanism-based drug targeting. *Biochem. Soc. Trans.* *31*, 474–481.
  16. Selkoe, D.J. (2002). Alzheimer's disease is a synaptic failure. *Science* *298*, 789–791.
  17. Holtzman, E., Freeman, A.R., and Kashner, L.A. (1971). Stimulation-dependent alterations in peroxidase uptake at lobster neuromuscular junctions. *Science* *173*, 733–736.
  18. Seguin, S.J., Morelli, F.F., Vinet, J., Amore, D., De Biasi, S., Poletti, A., Rubinsztein, D.C., and Carra, S. (2014). Inhibition of autophagy, lysosome and VCP function impairs stress granule assembly. *Cell Death Differ.* *21*, 1838–1851.
  19. Watson, J.A., Bhattacharyya, B.J., Vaden, J.H., Wilson, J.A., Icyuz, M., Howard, A.D., Phillips, E., DeSilva, T.M., Siegal, G.P., Bean, A.J., et al. (2015). Motor and Sensory Deficits in the teetering Mice Result from Mutation of the ESCRT Component HGS. *PLoS Genet.* *11*, e1005290.
  20. Hakim, V., Cohen, L.D., Zuchman, R., Ziv, T., and Ziv, N.E. (2016). The effects of proteasomal inhibition on synaptic proteostasis. *EMBO J.* *35*, 2238–2262.
  21. Mullally, J.E., Chernova, T., and Wilkinson, K.D. (2006). Doa1 is a Cdc48 adapter that possesses a novel ubiquitin binding domain. *Mol. Cell Biol.* *26*, 822–830.
  22. Pashkova, N., Gakhar, L., Winistorfer, S.C., Yu, L., Ramaswamy, S., and Piper, R.C. (2010). WD40 repeat propellers define a ubiquitin-binding domain that regulates turnover of F box proteins. *Mol. Cell* *40*, 433–443.
  23. Rumpf, S., and Jentsch, S. (2006). Functional division of substrate processing cofactors of the ubiquitin-selective Cdc48 chaperone. *Mol. Cell* *21*, 261–269.
  24. Ghislain, M., Dohmen, R.J., Levy, F., and Varshavsky, A. (1996). Cdc48p interacts with Ufd3p, a WD repeat protein required for ubiquitin-mediated proteolysis in *Saccharomyces cerevisiae*. *EMBO J.* *15*, 4884–4899.
  25. Wu, X., Li, L., and Jiang, H. (2016). Doa1 targets ubiquitinated substrates for mitochondria-associated degradation. *J. Cell Biol.* *213*, 49–63.
  26. Ossareh-Nazari, B., Bonizec, M., Cohen, M., Dokudovskaya, S., Delalande, F., Schaeffer, C., Van Dorselaer, A., and Dargemont, C. (2010). Cdc48 and Ufd3, new partners of the ubiquitin protease Ubp3, are required for ribophagy. *EMBO Rep.* *11*, 548–554.
  27. Ren, J., Pashkova, N., Winistorfer, S., and Piper, R.C. (2008). DOA1/UFD3 plays a role in sorting ubiquitinated membrane proteins into multivesicular bodies. *J. Biol. Chem.* *283*, 21599–21611.
  28. Han, S., Shin, D., Choi, H., and Lee, S. (2014). Molecular determinants of the interaction between Doa1 and Hse1 involved in endosomal sorting. *Biochem. Biophys. Res. Commun.* *446*, 352–357.
  29. Kurian, M.A., Zhen, J., Cheng, S.Y., Li, Y., Mordekar, S.R., Jardine, P., Morgan, N.V., Meyer, E., Tee, L., Pasha, S., et al. (2009). Homozygous loss-of-function mutations in the gene encoding the dopamine transporter are associated with infantile parkinsonism-dystonia. *J. Clin. Invest.* *119*, 1595–1603.
  30. Hall, E.A., Keighren, M., Ford, M.J., Davey, T., Jarman, A.P., Smith, L.B., Jackson, I.J., and Mill, P. (2013). Acute versus chronic loss of mammalian Azi1/Cep131 results in distinct ciliary phenotypes. *PLoS Genet.* *9*, e1003928.
  31. Ribchester, R.R., Thomson, D., Wood, N.I., Hinks, T., Gillingwater, T.H., Wishart, T.M., Court, F.A., and Morton, A.J. (2004). Progressive abnormalities in skeletal muscle and neuromuscular junctions of transgenic mice expressing the Huntington's disease mutation. *Eur. J. Neurosci.* *20*, 3092–3114.
  32. Ribchester, R.R. (2011). Quantal analysis of endplate potentials in mouse flexor digitorum brevis muscle. *Curr. Protoc. Mouse Biol.* *1*, 429–444.
  33. Ribchester, R.R., Mao, F., and Betz, W.J. (1994). Optical measurements of activity-dependent membrane recycling in motor nerve terminals of mammalian skeletal muscle. *Proc. Biol. Sci.* *255*, 61–66.
  34. Ribchester, R.R. (2011). One-step vital staining of presynaptic terminals and post-synaptic receptors at neuromuscular

- junctions in mouse skeletal muscle. *Curr. Protoc. Mouse Biol.* *1*, 489–496.
35. Wiśniewski, J.R., and Mann, M. (2012). Consecutive proteolytic digestion in an enzyme reactor increases depth of proteomic and phosphoproteomic analysis. *Anal. Chem.* *84*, 2631–2637.
  36. Farrell, J., Kelly, C., Rauch, J., Kida, K., García-Muñoz, A., Monsefi, N., Turriziani, B., Doherty, C., Mehta, J.P., Matallanas, D., et al. (2014). HGF induces epithelial-to-mesenchymal transition by modulating the mammalian hippo/MST2 and ISG15 pathways. *J. Proteome Res.* *13*, 2874–2886.
  37. Cox, J., Hein, M.Y., Lubner, C.A., Paron, I., Nagaraj, N., and Mann, M. (2014). Accurate proteome-wide label-free quantification by delayed normalization and maximal peptide ratio extraction, termed MaxLFQ. *Mol. Cell. Proteomics* *13*, 2513–2526.
  38. Pei, J., Kim, B.H., Tang, M., and Grishin, N.V. (2007). PROMALS web server for accurate multiple protein sequence alignments. *Nucleic Acids Res.* *35*, W649–W652.
  39. Sali, A., and Blundell, T.L. (1993). Comparative protein modelling by satisfaction of spatial restraints. *J. Mol. Biol.* *234*, 779–815.
  40. Lovell, S.C., Davis, I.W., Arendall, W.B., 3rd, de Bakker, P.I., Word, J.M., Prisant, M.G., Richardson, J.S., and Richardson, D.C. (2003). Structure validation by Calpha geometry: phi, psi and Cbeta deviation. *Proteins* *50*, 437–450.
  41. Vriend, G. (1990). WHAT IF: a molecular modeling and drug design program. *J. Mol. Graph.* *8*, 52–56, 29.
  42. Pawlowski, M., Gajda, M.J., Matlak, R., and Bujnicki, J.M. (2008). MetaMQAP: a meta-server for the quality assessment of protein models. *BMC Bioinformatics* *9*, 403.
  43. Schymkowitz, J., Borg, J., Stricher, F., Nys, R., Rousseau, F., and Serrano, L. (2005). The FoldX web server: an online force field. *Nucleic Acids Res.* *33*, W382–W388.
  44. Guerois, R., Nielsen, J.E., and Serrano, L. (2002). Predicting changes in the stability of proteins and protein complexes: a study of more than 1000 mutations. *J. Mol. Biol.* *320*, 369–387.
  45. Krieger, E., Koraimann, G., and Vriend, G. (2002). Increasing the precision of comparative models with YASARA NOVA—a self-parameterizing force field. *Proteins* *47*, 393–402.
  46. Van Durme, J., Delgado, J., Stricher, F., Serrano, L., Schymkowitz, J., and Rousseau, F. (2011). A graphical interface for the FoldX forcefield. *Bioinformatics* *27*, 1711–1712.
  47. Tina, K.G., Bhadra, R., and Srinivasan, N. (2007). PIC: Protein Interactions Calculator. *Nucleic Acids Res.* *35*, W473–W476.
  48. Rosciglione, S., Thériault, C., Boily, M.O., Paquette, M., and Lavoie, C. (2014). *Gαs* regulates the post-endocytic sorting of G protein-coupled receptors. *Nat. Commun.* *5*, 4556.
  49. Dantuma, N.P., Lindsten, K., Glas, R., Jellne, M., and Masucci, M.G. (2000). Short-lived green fluorescent proteins for quantifying ubiquitin/proteasome-dependent proteolysis in living cells. *Nat. Biotechnol.* *18*, 538–543.
  50. Raiborg, C., and Stenmark, H. (2009). The ESCRT machinery in endosomal sorting of ubiquitylated membrane proteins. *Nature* *458*, 445–452.
  51. Chiu, C.S., Brickley, S., Jensen, K., Southwell, A., McKinney, S., Cull-Candy, S., Mody, I., and Lester, H.A. (2005). GABA transporter deficiency causes tremor, ataxia, nervousness, and increased GABA-induced tonic conductance in cerebellum. *J. Neurosci.* *25*, 3234–3245.
  52. Kralic, J.E., Criswell, H.E., Osterman, J.L., O’Buckley, T.K., Wilkie, M.E., Matthews, D.B., Hamre, K., Breese, G.R., Homanics, G.E., and Morrow, A.L. (2005). Genetic essential tremor in gamma-aminobutyric acidA receptor alpha1 subunit knockout mice. *J. Clin. Invest.* *115*, 774–779.
  53. Poeter, M., Radke, S., Koese, M., Hessner, F., Hegemann, A., Musiol, A., Gerke, V., Grewal, T., and Rescher, U. (2013). Disruption of the annexin A1/S100A11 complex increases the migration and clonogenic growth by dysregulating epithelial growth factor (EGF) signaling. *Biochim. Biophys. Acta* *1833*, 1700–1711.
  54. Dell’Angelica, E.C., Mullins, C., and Bonifacino, J.S. (1999). AP-4, a novel protein complex related to clathrin adaptors. *J. Biol. Chem.* *274*, 7278–7285.
  55. Sun, W., Yan, Q., Vida, T.A., and Bean, A.J. (2003). Hrs regulates early endosome fusion by inhibiting formation of an endosomal SNARE complex. *J. Cell Biol.* *162*, 125–137.
  56. Kauppi, M., Simonsen, A., Bremnes, B., Vieira, A., Callaghan, J., Stenmark, H., and Olkkonen, V.M. (2002). The small GTPase Rab22 interacts with EEA1 and controls endosomal membrane trafficking. *J. Cell Sci.* *115*, 899–911.
  57. Duit, S., Mayer, H., Blake, S.M., Schneider, W.J., and Nimpf, J. (2010). Differential functions of ApoER2 and very low density lipoprotein receptor in Reelin signaling depend on differential sorting of the receptors. *J. Biol. Chem.* *285*, 4896–4908.
  58. Hu, F., Padukkavidana, T., Vægter, C.B., Brady, O.A., Zheng, Y., Mackenzie, I.R., Feldman, H.H., Nykjaer, A., and Strittmatter, S.M. (2010). Sortilin-mediated endocytosis determines levels of the frontotemporal dementia protein, progranulin. *Neuron* *68*, 654–667.
  59. Trommsdorff, M., Gotthardt, M., Hiesberger, T., Shelton, J., Stockinger, W., Nimpf, J., Hammer, R.E., Richardson, J.A., and Herz, J. (1999). Reeler/Disabled-like disruption of neuronal migration in knockout mice lacking the VLDL receptor and ApoE receptor 2. *Cell* *97*, 689–701.
  60. Brown, M.C., and Ironton, R. (1977). Motor neurone sprouting induced by prolonged tetrodotoxin block of nerve action potentials. *Nature* *265*, 459–461.
  61. Abdul Rehman, S.A., Kristariyanto, Y.A., Choi, S.Y., Nkosi, P.J., Weidlich, S., Labib, K., Hofmann, K., and Kulathu, Y. (2016). MINDY-1 is a member of an evolutionarily conserved and structurally distinct new family of deubiquitinating enzymes. *Mol. Cell* *63*, 146–155.
  62. Kristariyanto, Y.A., Abdul Rehman, S.A., Campbell, D.G., Morrice, N.A., Johnson, C., Toth, R., and Kulathu, Y. (2015). K29-selective ubiquitin binding domain reveals structural basis of specificity and heterotypic nature of k29 polyubiquitin. *Mol. Cell* *58*, 83–94.
  63. Erpapazoglou, Z., Dhaoui, M., Pantazopoulou, M., Giordano, F., Mari, M., Léon, S., Raposo, G., Reggiori, F., and Haguenaer-Tsapis, R. (2012). A dual role for K63-linked ubiquitin chains in multivesicular body biogenesis and cargo sorting. *Mol. Biol. Cell* *23*, 2170–2183.
  64. Nathan, J.A., Kim, H.T., Ting, L., Gygi, S.P., and Goldberg, A.L. (2013). Why do cellular proteins linked to K63-polyubiquitin chains not associate with proteasomes? *EMBO J.* *32*, 552–565.
  65. Ren, X., and Hurlley, J.H. (2010). VHS domains of ESCRT-0 cooperate in high-avidity binding to polyubiquitinated cargo. *EMBO J.* *29*, 1045–1054.
  66. Seibenhener, M.L., Babu, J.R., Geetha, T., Wong, H.C., Krishna, N.R., and Wooten, M.W. (2004). Sequestosome 1/p62 is a polyubiquitin chain binding protein involved in ubiquitin proteasome degradation. *Mol. Cell. Biol.* *24*, 8055–8068.
  67. Tan, J.M., Wong, E.S., Kirkpatrick, D.S., Pletnikova, O., Ko, H.S., Tay, S.P., Ho, M.W., Troncoso, J., Gygi, S.P., Lee, M.K., et al.

- (2008). Lysine 63-linked ubiquitination promotes the formation and autophagic clearance of protein inclusions associated with neurodegenerative diseases. *Hum. Mol. Genet.* *17*, 431–439.
68. Papadopoulos, C., Kirchner, P., Bug, M., Grum, D., Koerver, L., Schulze, N., Poehler, R., Dressler, A., Fengler, S., Arhzaouy, K., et al. (2017). VCP/p97 cooperates with YOD1, UBXD1 and PLAA to drive clearance of ruptured lysosomes by autophagy. *EMBO J.* *36*, 135–150.
  69. Neu-Yilik, G., Amthor, B., Gehring, N.H., Bahri, S., Paidassi, H., Hentze, M.W., and Kulozik, A.E. (2011). Mechanism of escape from nonsense-mediated mRNA decay of human beta-globin transcripts with nonsense mutations in the first exon. *RNA* *17*, 843–854.
  70. Falik Zaccai, T.C., Savitzki, D., Zivony-Elboum, Y., Vilboux, T., Fitts, E.C., Shoval, Y., Kalfon, L., Samra, N., Keren, Z., Gross, B., et al. (2017). Phospholipase A2-activating protein is associated with a novel form of leukoencephalopathy. *Brain* *140*, 370–386.
  71. Bennett, E.J., Shaler, T.A., Woodman, B., Ryu, K.Y., Zaitseva, T.S., Becker, C.H., Bates, G.P., Schulman, H., and Kopito, R.R. (2007). Global changes to the ubiquitin system in Huntington's disease. *Nature* *448*, 704–708.
  72. Watts, G.D., Wymer, J., Kovach, M.J., Mehta, S.G., Mumm, S., Darvish, D., Pestronk, A., Whyte, M.P., and Kimonis, V.E. (2004). Inclusion body myopathy associated with Paget disease of bone and frontotemporal dementia is caused by mutant valosin-containing protein. *Nat. Genet.* *36*, 377–381.
  73. Kitada, T., Asakawa, S., Hattori, N., Matsumine, H., Yamamura, Y., Minoshima, S., Yokochi, M., Mizuno, Y., and Shimizu, N. (1998). Mutations in the parkin gene cause autosomal recessive juvenile parkinsonism. *Nature* *392*, 605–608.
  74. Boycott, K.M., Flavelle, S., Bureau, A., Glass, H.C., Fujiwara, T.M., Wirrell, E., Davey, K., Chudley, A.E., Scott, J.N., McLeod, D.R., and Parboosingh, J.S. (2005). Homozygous deletion of the very low density lipoprotein receptor gene causes autosomal recessive cerebellar hypoplasia with cerebral gyral simplification. *Am. J. Hum. Genet.* *77*, 477–483.
  75. Madeo, F., Eisenberg, T., and Kroemer, G. (2009). Autophagy for the avoidance of neurodegeneration. *Genes Dev.* *23*, 2253–2259.
  76. Fornai, F., Longone, P., Cafaro, L., Kastsuchenka, O., Ferrucci, M., Manca, M.L., Lazzeri, G., Spalloni, A., Bellio, N., Lenzi, P., et al. (2008). Lithium delays progression of amyotrophic lateral sclerosis. *Proc. Natl. Acad. Sci. USA* *105*, 2052–2057.
  77. DiAntonio, A., Haghighi, A.P., Portman, S.L., Lee, J.D., Amaranto, A.M., and Goodman, C.S. (2001). Ubiquitination-dependent mechanisms regulate synaptic growth and function. *Nature* *412*, 449–452.
  78. Watts, R.J., Hoopfer, E.D., and Luo, L. (2003). Axon pruning during *Drosophila* metamorphosis: evidence for local degeneration and requirement of the ubiquitin-proteasome system. *Neuron* *38*, 871–885.
  79. Chen, P.C., Bhattacharyya, B.J., Hanna, J., Minkel, H., Wilson, J.A., Finley, D., Miller, R.J., and Wilson, S.M. (2011). Ubiquitin homeostasis is critical for synaptic development and function. *J. Neurosci.* *31*, 17505–17513.
  80. Bizzi, A., Schaetzle, B., Patton, A., Gambetti, P., and Autilio-Gambetti, L. (1991). Axonal transport of two major components of the ubiquitin system: free ubiquitin and ubiquitin carboxyl-terminal hydrolase PGP 9.5. *Brain Res.* *548*, 292–299.
  81. Walters, B.J., Campbell, S.L., Chen, P.C., Taylor, A.P., Schroeder, D.G., Dobrunz, L.E., Artavanis-Tsakonas, K., Ploegh, H.L., Wilson, J.A., Cox, G.A., and Wilson, S.M. (2008). Differential effects of Usp14 and Uch-L1 on the ubiquitin proteasome system and synaptic activity. *Mol. Cell. Neurosci.* *39*, 539–548.
  82. Hao, Y.H., Fountain, M.D., Jr., Fon Tacer, K., Xia, F., Bi, W., Kang, S.H., Patel, A., Rosenfeld, J.A., Le Caignec, C., Isidor, B., et al. (2015). USP7 acts as a molecular rheostat to promote WASH-dependent endosomal protein recycling and is mutated in a human neurodevelopmental disorder. *Mol. Cell* *59*, 956–969.
  83. Vilariño-Güell, C., Wider, C., Ross, O.A., Dachsel, J.C., Kachergus, J.M., Lincoln, S.J., Soto-Ortolaza, A.I., Cobb, S.A., Wilhoite, G.J., Bacon, J.A., et al. (2011). VPS35 mutations in Parkinson disease. *Am. J. Hum. Genet.* *89*, 162–167.
  84. Sellin, L.C., Molgó, J., Törnquist, K., Hansson, B., and Thesleff, S. (1996). On the possible origin of giant or slow-rising miniature end-plate potentials at the neuromuscular junction. *Pflugers Arch.* *431*, 325–334.
  85. Waites, C.L., Leal-Ortiz, S.A., Okerlund, N., Dalke, H., Fejtova, A., Altmann, W.D., Gundelfinger, E.D., and Garner, C.C. (2013). Bassoon and Piccolo maintain synapse integrity by regulating protein ubiquitination and degradation. *EMBO J.* *32*, 954–969.
  86. Fernandes, A.C., Uytterhoeven, V., Kuenen, S., Wang, Y.C., Slabbaert, J.R., Swerts, J., Kasprovicz, J., Aerts, S., and Verstreken, P. (2014). Reduced synaptic vesicle protein degradation at lysosomes curbs TBC1D24/sky-induced neurodegeneration. *J. Cell Biol.* *207*, 453–462.
  87. Uytterhoeven, V., Kuenen, S., Kasprovicz, J., Miskiewicz, K., and Verstreken, P. (2011). Loss of skywalker reveals synaptic endosomes as sorting stations for synaptic vesicle proteins. *Cell* *145*, 117–132.
  88. Corbett, M.A., Bahlo, M., Jolly, L., Afawi, Z., Gardner, A.E., Oliver, K.L., Tan, S., Coffey, A., Mulley, J.C., Dibbens, L.M., et al. (2010). A focal epilepsy and intellectual disability syndrome is due to a mutation in TBC1D24. *Am. J. Hum. Genet.* *87*, 371–375.
  89. Falace, A., Filipello, F., La Padula, V., Vanni, N., Madia, F., De Pietri Tonelli, D., de Falco, F.A., Striano, P., Dagna Bricarelli, F., Minetti, C., et al. (2010). TBC1D24, an ARF6-interacting protein, is mutated in familial infantile myoclonic epilepsy. *Am. J. Hum. Genet.* *87*, 365–370.
  90. Zhang, X., Smits, A.H., van Tilburg, G.B., Jansen, P.W., Makowski, M.M., Ova, H., and Vermeulen, M. (2017). An interaction landscape of ubiquitin signaling. *Mol. Cell* *65*, 941–955.e8.

**Supplemental Data**

***PLAA* Mutations Cause a Lethal Infantile Epileptic  
Encephalopathy by Disrupting Ubiquitin-Mediated  
Endolysosomal Degradation of Synaptic Proteins**

Emma A. Hall, Michael S. Nahorski, Lyndsay M. Murray, Ranad Shaheen, Emma Perkins, Kosala N. Dissanayake, Yosua Kristaryanto, Ross A. Jones, Julie Vogt, Manon Rivagorda, Mark T. Handley, Girish R. Mali, Tooba Quidwai, Dinesh C. Soares, Margaret A. Keighren, Lisa McKie, Richard L. Mort, Noor Gammoh, Amaya Garcia-Munoz, Tracey Davey, Matthieu Vermeren, Diana Walsh, Peter Budd, Irene A. Aligianis, Eissa Faqeih, Alan J. Quigley, Ian J. Jackson, Yogesh Kulathu, Mandy Jackson, Richard R. Ribchester, Alex von Kriegsheim, Fowzan S. Alkuraya, C. Geoffrey Woods, Eamonn R. Maher, and Pleasantine Mill



## Supplemental Note: Case Reports

The first three families containing children with a severe neurodevelopmental disorder were independently ascertained and investigated. The final overarching diagnosis was of a novel disorder, PLAA-associated neurodevelopmental disorder (PLAAND), but the initial clinical diagnoses were Acrocallosal-like syndrome in Family A, PEHO syndrome in Family B, and PEHO-like syndrome in Family C. The inheritance pattern in all three families appeared autosomal recessive; males and females were equally affected, there were normal siblings, the parents had no features of the condition, and parents were first cousins. All families were of Pakistani origin, but not known to be related. A subsequent family carrying the c.68dupG:p.(Leu24Profs\*55) mutation was identified in a Middle Eastern cohort of primary microcephaly with seizures patients (Family D). The study had research ethics approval from South Birmingham and Cambridge Local Research Ethics Committees, or from KFSHRC IRB.

Family A comprised a large consanguineous family with five affected individuals, from two sibships (see Figure S1):

The male proband (case A-IV-6) was born at term by emergency Caesarean section because of fetal distress following a pregnancy complicated by polyhydramnios from 34 weeks. He was in good condition with Apgar scores of 5 at one minute and 9 at five minutes and normal growth parameters. He was admitted to the neonatal unit because of feeding difficulties and was noted to have significant neurological abnormalities with truncal hypotonia, very stiff extended limbs with increased tone and he was unable to suck or swallow. Hirsutism, a variety of craniofacial dysmorphisms including a short nose, long philtrum, high palate, low set ears, bilateral single palmar creases and postaxial polydactyly of the left hand and right foot were noted. Cranial ultrasound imaging showed a large central cystic defect between the lateral ventricles and superior to 3rd ventricle. An initial eye assessment found the eyes to be normal but small, however abnormal fundal pigment was later noted. He was found to have congenital hypothyroidism. He continued to feed poorly and developed abnormal movements, which were treated with phenobarbitone. An EEG was immature but there were no other features of note. He died at 12 days following episodes of recurrent profound apnoea.

Subsequently a second affected male sibling (case A-IV-7) was born by forceps delivery. Antenatally a cystic lesion lying superior to the third ventricle thought to represent a large

cavum was identified on foetal MRI. He had Apgar scores of 5 at one minute and 9 at five minutes. He required facial oxygen and was transferred to the neonatal unit with respiratory distress. He had truncal hypotonia, stiffness of the limbs and an inability to suck or swallow. He had similar facial dysmorphic features to case A-IV-6 and a mildly receding forehead, low set posteriorly rotated ears, a prominent sharp cupid's bow lip, a thin vermilion border, a very flat philtrum, a high palate, micrognathia, long fingers and bilateral single palmar creases, left unilateral postaxial polydactyly and a bulbous right 5th toe. Birth weight, length and head circumference were within the normal range however his head circumference had fallen from the 50 centile to the 9 centile by age 5 months. He had puffy feet. He had episodes of apnoea and required tube feeding. He developed optic atrophy and made no developmental progress. A brain MRI scan at 1 week of age was reported as showing a thin intact corpus callosum, delayed myelination, mildly dilated occipital and temporal horns of the lateral ventricles and a simple immature overall gyral pattern particularly frontally, a large cavum septum pellucidum and vergae. He had recurrent pneumonia and died at 16 months of age.

A third sibling (case A-IV-8) was born after an uneventful pregnancy. She did not have polydactyly but her facial appearance and neurodevelopment were similar to her brothers. At 9 months of age her weight was on the 3 centile and her head circumference and length were below the 3rd centile. She could not fix and follow and she had horizontal pendular nystagmus and bilateral optic atrophy. Her hearing was normal. She developed seizures from age 2 years and she died 4 months later with respiratory distress. Her brain MRI scan (at three months) showed a thin intact corpus callosum, delayed myelination, large ventricles with moderate cavum septum pellucidum and CSF spaces, with irregularity/mildly dysplastic outline with the right lateral ventricle being larger than the left (**Fig.1A-C**). Overall the gyral pattern was slightly simple/immature. A full metabolic screen and karyotype was normal.

The affected fourth sibling (case A-IV-10) was a male. In utero his activity was reported to be normal and foetal MRI brain imaging was normal. He was born at 35 weeks of pregnancy in good condition and with normal growth parameters. He had central hypotonia and peripheral hypertonia. He was unable to suck or swallow. He required nasogastric tube feeds and treatment for gastro-oesophageal reflux. At a corrected age of 5 months he was tolerating nasogastric feeds and he had intermittent apnoeas which responded to stimulation. He had nystagmus and roving eye movements. He could fix but

not follow with his eyes. His eyes appeared structurally normal on ophthalmological assessment. Facially he had bitemporal narrowing and full cheeks. He had thick eyebrows. His ears were low set and posteriorly rotated with vertical earlobe creases. He had swelling on the dorsum of his hands and feet and hirsutism. His weight was on the 9 centile and his head circumference was on the 0.4-2 centile. An EEG had features of an epileptic encephalopathy and he was treated with anticonvulsants from the age of a year. At 14 months of age the apneas were less frequent and his stiffness was reduced with baclofen. He had little spontaneous movement and had made no developmental progress. Brain MRI scan at three weeks of age reported large cavum septum pellucidum/cavum vergae, simplified gyral pattern (more affected anteriorly), diffusely increased T2-signal in white matter throughout, thin corpus callosum and enlargement of the trigones and occipital horns, consistent with colpocephaly. He died following a chest infection at the age of 22 months.

A female first cousin (case A-IV-1) to these children whose parents were also first cousins was reported to have the same condition. She was born at 42 weeks of pregnancy with normal growth parameters. She was readmitted on day 8 because of poor feeding due to a poor suck and was treated for gastro-oesophageal reflux. She continued to have a poor feeding and was mainly tube fed. She was noted to have truncal hypotonia and limb hypertonia with clenched hands. She had episodes of suspected seizures with stiffening and clenching of the fists, flickering of the eyes and cyanosis. She had a similar facial appearance, a left tragus ear tag, single palmar creases and 2/3 toe syndactyly. Her left renal pelvis was also dilated. Her EEG was abnormal and her MRI (aged three weeks: **Fig. 1D,E**) showed a delayed gyral pattern more pronounced anteriorly with brain development consistent with 34 weeks gestation with a moderate sized cavum septum pellucidum/cavum vergae, dilatation of the trigones and occipital horns (colpocephaly), diffuse thinning of the corpus callosum and increased white matter signal. At 10 months of age her weight was 7.6 kg on the 9-25 centile, her length was 59 cm below the 0.4 centile and her head circumference was 41.4 cm on the 2 centile. She had severe global delay. She would cry and gurgle loudly. She had become increasingly hypertonic with increased tone and brisk limb reflexes. She had contractures of the wrists and ankles. She was fully tube fed and on treatment for gastro-oesophageal reflux. Episodes of stiffening associated with blue lips became less frequent. She had impaired visual responsiveness

with scanning eye movements and sometimes rapid nystagmus. She developed acute respiratory failure secondary to a chest infection and died age 14 months.

The second and third families contained individuals with clinical features of the neurodevelopmental disorder PEHO (progressive encephalopathy with oedema, hypsarrhythmia, and optic atrophy) syndrome. In Family B the oldest sibling had died but, by history, was likely affected (but clinical details were not available and the child is not included in the summary clinical description). One of six subsequent children was affected (case B-III-1). The parents were Kashmiri in origin and were first cousins. The affected son was born at term after a normal pregnancy. He was normal at birth, left hospital, but then presented in the first week of life with fits, was found to be hypertonic, to have oedema restricted to the dorsum of his hands and feet, and to have deep set eyes and dysplastic finger and toe nails. The seizures continued until age 5 months and then lessened (not thought to be related to medication induced). Secondary microcephaly developed (head circumference was normal at birth but  $<-2SD$  at 14 months) and it became clear that he had severe neurodevelopmental delay. Over the first year of life his fingers and toes became noticeably overlapped and he held his plantar flexed, but this was not a fixed deformity. Roving eye movement developed in the first three months, and it was clear by six months that he had gross visual impairment; mild optic atrophy was noted at six months of age. Brain imaging showed a simplified gyral pattern most evident in the frontal lobes, and that the cerebellum was of slightly reduced size. He died at 5 years of age of pneumonia, having made no developmental progress.

In Family C the affected child (case C-III-1) was the third born after two unaffected siblings to consanguineous parents (first cousins) originating from Pakistan. His pregnancy and delivery were normal but he developed fits on the first day, which proved difficult to control. Over the first year a progressive spastic paraplegia became apparent. The dorsum of his feet (but not his hands) had always been swollen, and he also had a coarse facial appearance, arched eyebrows, deep set eyes, synophrys, and long digits; the fingers became progressively more flexed with time. Whilst the head circumference was normal at birth secondary microcephaly was evident by one year. An EEG was very abnormal with hypsarrhythmia. Brain imaging by MRI revealed bilateral pachygyria, a small corpus callosum, small cerebellum and diffuse white matter changes. He died at 6 years of repeated pneumonias, and had also made no developmental progress.



In Family D, the father had two older brothers who had died from a similar clinical condition to case D-VIII-1, although the details are not included here. The affected individual D-VIII-1 was born full term but needed immediate ventilation. He had poor Apgar scores and respiratory acidosis. He had subtle facial dysmorphism (bulbous nose, large ears, and long philtrum) and 3-limb postaxial polydactyly. His birth weight was 2.3 kg, length 55cm and OFC 30.2cm. On 1<sup>st</sup> day postnatal, he developed repeated tonic-clonic seizures associated with tachycardia and apneic episodes which required increasing doses of keppra. An EEG done on the 2<sup>nd</sup> day revealed ripples of sleep spindles centrally predominant. Frequent negative Rolandic sharp waves and fronto-central sharp waves were encountered independently in both right and left fronto-central regions. Continuity of sharp waves constituting electrographic seizures were also noted. In addition, electro-clinical seizures were manifested with hyper-rhythmic discharges that emanated from the right frontal and centro-occipital regions. His initial brain CT showed diffuse bilateral symmetrical and significant reduction in the attenuation of the white matter. A brain MRI done at 20 days showed abnormal gyration and sulcation of both cerebral hemispheres, more pronounced at the level of the frontal lobes. In addition, there was prominent T2 hyperintensity. The echocardiography showed small VSD and ASD-II. The baby transferred to another hospital at the 2<sup>nd</sup> month of life with partially controlled seizure on oral pyridoxine and keppra. The weight 3.01 kg and head circumference 32.5 cm. The baby had several bouts of chest infections and died at 10 months of life.

To define the molecular basis of the autosomal recessively inherited neurodevelopmental disorder in Family A, genome-wide SNP genotyping was undertaken by Affymetrix SNP arrays with DNA from each of the four affected individuals (10k SNP arrays in case A-IV-6 and A-IV-7 and 250k SNP arrays in A-IV-1 and A-IV-8). Initially 6 areas of homozygosity were identified, however further analysis using microsatellite markers in the extended family revealed a single ~14Mb overlapping region of autozygosity on chromosome 9 between D9S235 and D9S1868 (maximum 2-point LOD score was 3.02). Candidate gene analysis was performed and a c.68G>T missense substitution (p.Gly23Val) was identified within the *PLAA* gene and shown to segregate with disease status in the family. This variant was not found in the Exome Variant Server, 1000 Genomes or ExAc databases and was also not detected in 3000 ethnically matched control chromosomes (data not shown). Subsequently whole exome sequencing was performed in

an affected child from family A and no other candidate pathogenic rare variants were detected within the candidate target region (data not shown).

In parallel with investigations performed in Family A, exome analysis was performed on 27 families referred with a clinical diagnosis of PEHO or PEHO-like syndrome and a subanalysis of 12 consanguineous families within the cohort revealed that the probands from Families B and C both carried the same homozygous *PLAA* c.68G>T missense substitution. (Each individual bore a further 5-10 potential pathogenic homozygous mutations within homozygous regions >2cM, but none were shared between the two families). The c.68G>T *PLAA* mutation was confirmed by Sanger sequencing, and segregated as expected for an autosomal recessive disease in each family. Review of the other 25 PEHO/PEHO-like families found no further families with potential bi-allelic *PLAA* mutations. Subsequently, homozygosity mapping and exome sequencing of a primary microcephaly pedigree (Family D) revealed that case D-VIII-1 had a homozygous mutation in *PLAA* :c.68dupG:p.(Leu24Profs\*55).

To determine if the G23V mutation was recurrent or ancestral, the genomic region surrounding the c.68G>T *PLAA* mutation was analysed in all three families. In each affected individual there was a region of homozygosity >3cM/3Mb. No further pathogenic mutations were found within this region on re-analysis. Within the 3cM region, and centred on the homozygous mutation, was a 1cM/1Mb region of concordant homozygosity shared between all affected individuals. This result strongly suggests that all three families were distantly related, and that the mutation was ancestral rather than a recurrent mutation (Table S2).

**Figure S1: Pedigrees of PLAAND families.**

Related to **Figure 1**. Pedigrees of 4 families with identified homozygous *PLAA* mutations. Squares represent males and circles represent females. Filled symbols represent affected individuals. Unaffected individuals who were genotyped for *PLAA* are represented as black dots in the pedigree symbols. For family A, affected individuals who were genotyped as homozygous for the *PLAA* c.[68G>T] mutation are represented as white dots in the pedigree symbols. For family B and C, “affected only” pedigrees are shown, such that unaffected siblings have not been included but have been described in the extended clinical details. For families B, C and D, identified homozygous *PLAA* mutations are shown below the affected.

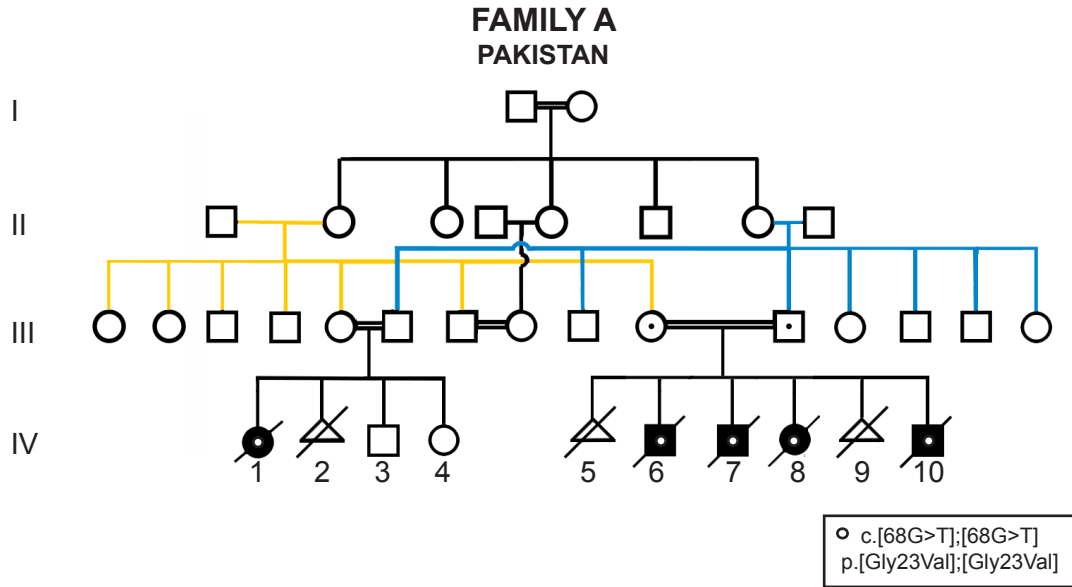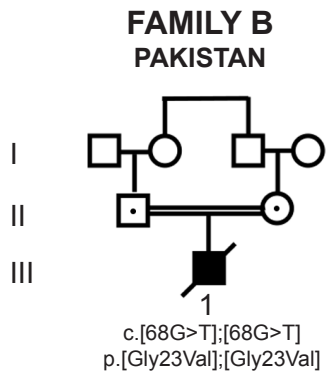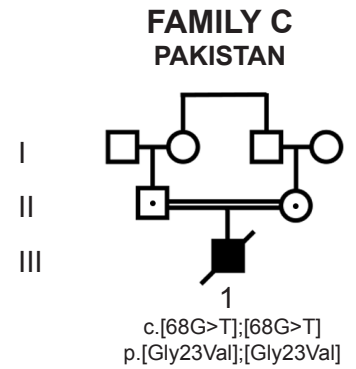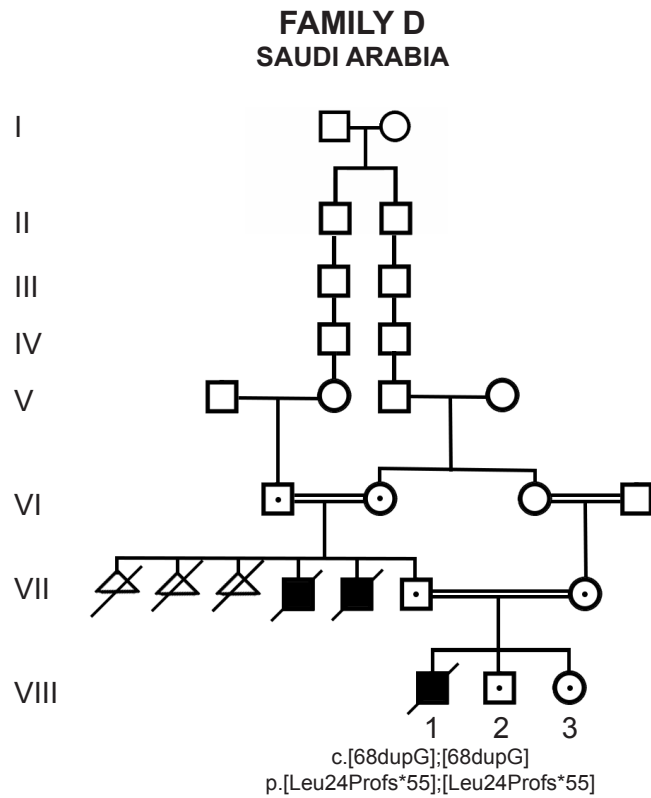



**Figure S2: PLAA is essential for mammalian development.**

Related to **Figure 2**. *Plaa*<sup>+/*tm1(NCOM)Cmhd*</sup> C2 (Nagy) embryonic stem cells, which have insertion of NorCOMM cassette pNTARU creating a 918bp deletion, removing Exon2 of *Plaa*, and inserting a LacZ reporter gene, were injected into C57BL/6J blastocysts and implanted into a recipient C57BL/6J female. These were backcrossed onto C57BL/6J, then subsequently to CD1, and no differences in survival or gross phenotypes were observed on the two backgrounds studied. **(A)** Schematic of the NORCOMM *Plaa*<sup>-</sup> deletion allele (*Plaa*<sup>-</sup>; MGI:104810), showing replacement of Exon 2 (ENSMUSE00001223836) with a splice acceptor (SA), a self-cleaving peptide (T2A), LacZ gene allowing readout of *Plaa* expression pattern, followed by a strong stop (pA). Position of the human p.Gly23Val mutation is shown as an asterisk in the first exon. **(B)** No PLAA protein remains in *Plaa*<sup>-/-</sup> MEFs. **(C)** E11.5 LacZ stained *Plaa*<sup>+/-</sup> embryo, showing ubiquitous expression of the *LacZ* reporter. **(D)** Immunocytochemistry staining reveals PLAA is ubiquitously localized throughout the cell, in both the cytoplasm and the nucleus. The staining is absent in *Plaa*<sup>-/-</sup> confirming specificity. **(E)** Most *Plaa*<sup>-/-</sup> embryos die before E15.5 (**Table S3**), and those that survive are smaller, anemic and display a curved body axis. Scale bars represent 1mm (**C**, **E**) or 10  $\mu$ m (**D**).

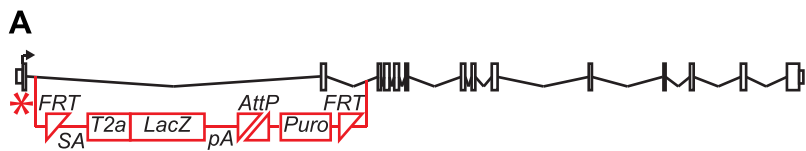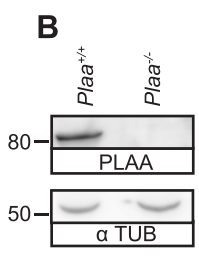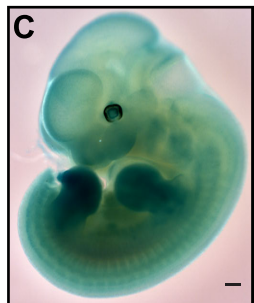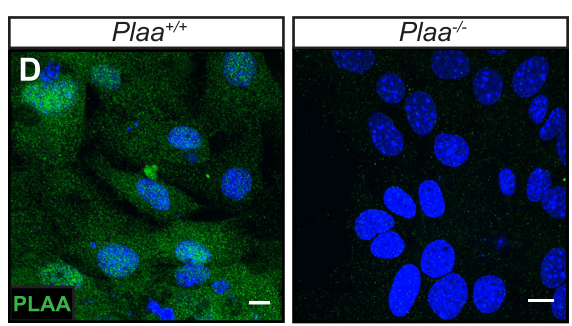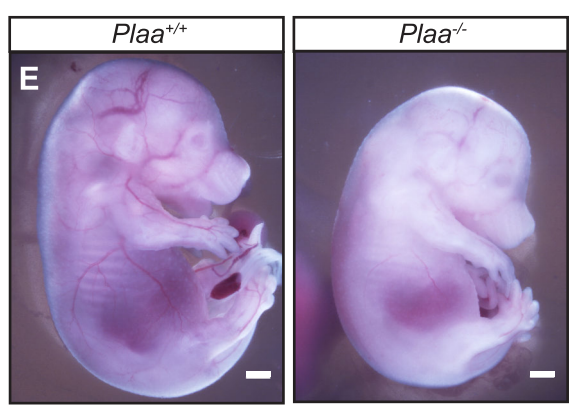

**Figure S3: PLAA is not required for normal early endosome or lysosomal morphology.** Related to **Figure 2**. (A) qRT-PCR depicts no change in transcription of mitophagy-associated genes (*Cox1*, *Mfn1* and *Atad1*), slight reduction/no change in ERAD genes (*Hsp90b*, *Hspa5*, *Vimp1*) and a reduction in expression of *Ubb*, one of several ubiquitin-encoding genes in *Plaa*<sup>-/-</sup> embryos, suggesting mitophagy, ERAD and UPS transcriptional signatures are not increased upon *Plaa* deletion. n = 5 *Plaa*<sup>-/-</sup> embryos, n = 4 *Plaa*<sup>-/-</sup> embryos (B - E) Early endosome number and localization is unchanged (marked by EEA1, quantified in D and E) and lysosomal compartments are grossly normal in *Plaa*<sup>-/-</sup> MEFs (LAMP1 (C)). (F) Internalization of DOP-Flag into the lumen of Rab5<sup>Q79L</sup> enlarged endosomes upon addition of ligand DPDPE is disrupted in *Plaa* null MEFs (quantified in (G)). Scale bars represent 10 μm. Error bars represent SEM. P < 0.05, \*\*, P < 0.01, ns not significant. Student's t-test. N = 3 MEF lines per genotype.

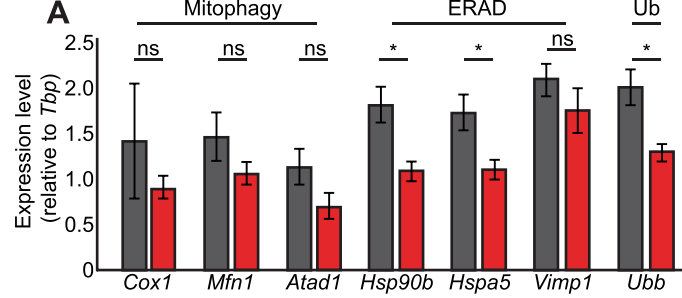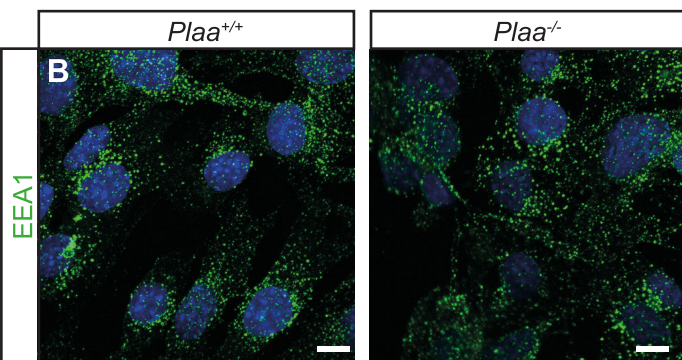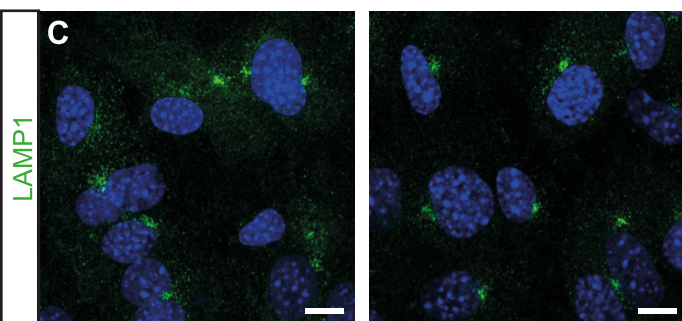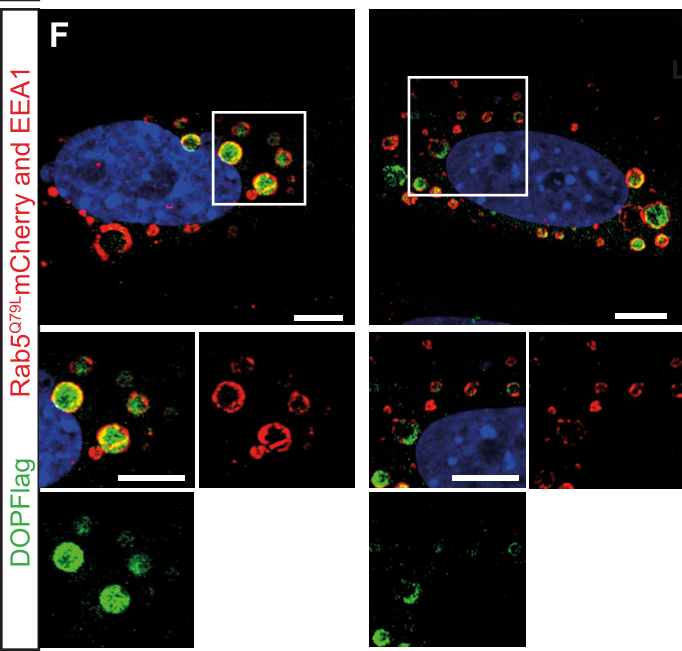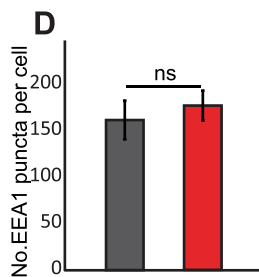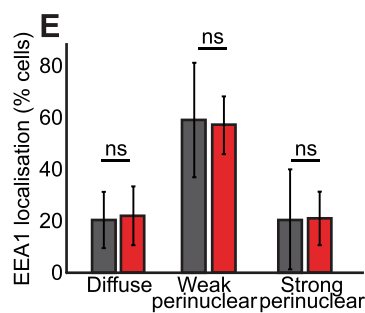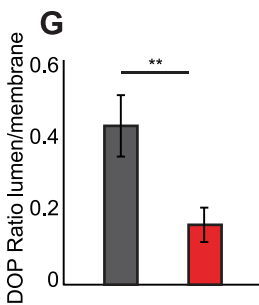



**Figure S4: Similar to PLAAND affected individuals, *Plaa*<sup>G23V/G23V</sup> and *Plaa*<sup>G23V/-</sup> mice exhibit growth retardation and neuromuscular weakness.**

Related to **Figure 2**. (A) Schematic strategy for gene editing using CRISPR-CAS9 nickase system to generate the c.68G>T disease mutation in mouse *Plaa* using homology directed repair. Briefly, guide RNA targeting sequences either side of the c.68G (**Table S9**) were cloned into pX335-U6-Chimeric\_BB-CBh-hSpCas9n(D10A) (Addgene Plasmid #42335), which encodes nickase Cas9 and together with a ssDNA repair template homologous to 100bp either side of c.68G, with the c.68G>T change introduced (**Table S9**) were pronuclear injected into blastocysts, which were implanted into recipient C57BL/6J females. From one round of injection, 33 animals were born, of which 3 had solely the c.68G>T change. The nature of the mutation was confirmed by Sanger sequencing. Allele symbol: *Plaa*<sup>em1Pmi</sup> MGI:5828117. (B) Sequencing confirming precise editing to the disease mutation (red box) in a *Plaa*<sup>G23V/G23V</sup> mutant mouse. (C) *Plaa*<sup>G23V/-</sup> mutants have reduced body weight at P14. *Plaa*<sup>G23V/G23V</sup> mice are normal weight at P14, weigh significantly less at 4 weeks, then catch up to control littermates by 8 weeks. n>3 per genotype. \* P < 0.05 \*\* P < 0.01, Students t-test. Error bars represent SEM. (D) *Plaa*<sup>G23V/G23V</sup> mice show pronounced kyphosis indicative of neuromuscular weakness.

**A**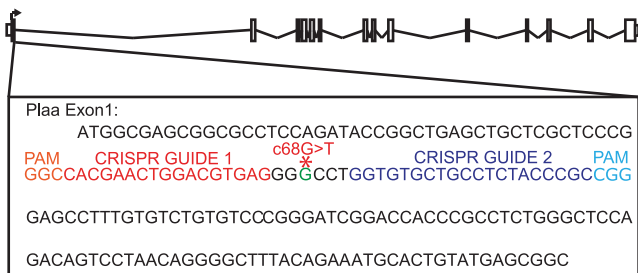**B**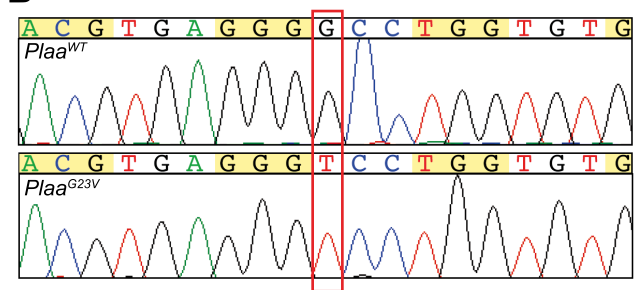**C**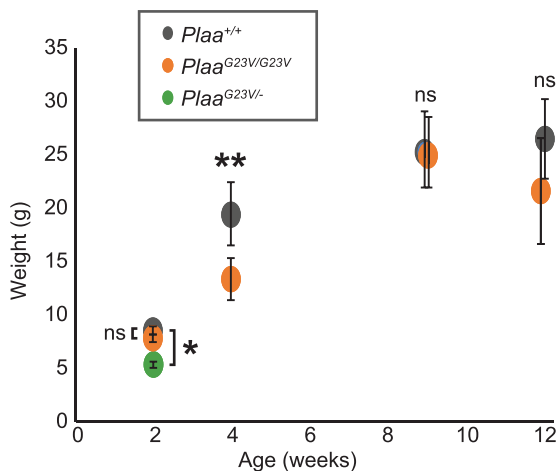**D**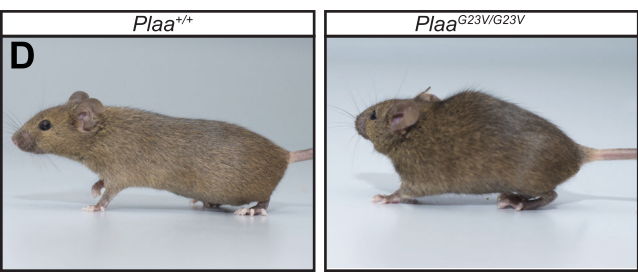

**Figure S5: *Plaa*<sup>G23V/G23V</sup> and *Plaa*<sup>G23V/-</sup> mice display early-onset kinetic tremor, disrupted cerebellar morphology and reactive gliosis.**

Related to **Figure 4**. (A - B) Histological analyses of *Plaa*<sup>G23V/G23V</sup> cerebella at 3 months and *Plaa*<sup>G23V/-</sup> cerebella at P20, show *Plaa*<sup>G23V/-</sup> mice also have significantly smaller cerebella relative to the whole brain at P14 (C), with a disrupted foliation pattern. (D) *Plaa*<sup>G23V/-</sup> mice also display early-onset kinetic tremor with postural aspect, detectable by eye from P7 and with this assay from before P14. To measure tremor, mice were placed in a clear Perspex tube suspended inside a box on elasticated bungees mounted with a PZT film sensor LDT0-028 sensor to detect movement. A camera allowed visualization of the mouse during the experiment. Mice were allowed to acclimatize to the tube for 10 minutes before readings were taken. (E - H) Microarray analysis of RNA from *Plaa*<sup>+/+</sup> and *Plaa*<sup>G23V/G23V</sup> cerebella at 3 months revealed specific signature of down-regulation of Purkinje cell markers and up-regulation of reactive gliosis markers, with no change in the proteins shown to be upregulated by proteomic analysis (**Figure 4G**), confirmed here by qRT-PCR (**E, F, G**). (H) Western blot confirming the upregulation of AP4S1 and SNAP25 seen by proteomic analysis (**Figure 4G**). Graphs to the right show densitometry of AP4S1 and SNAP25 relative to  $\alpha$ -tubulin ( $\alpha$ -TUB). (I) Synaptic preparations from *Plaa*<sup>+/+</sup> and *Plaa*<sup>G23V/G23V</sup> cerebella again confirm the upregulation of SNAP25 (quantified in **J**), while also showing PLAA is present in both the cytoplasmic and synaptic preps. Levels of free and poly-ubiquitin in the synapse are unchanged (quantified in **K**). Error bars represent SEM, \* P < 0.05, \*\* P < 0.01, \*\*\* P < 0.01, Student's t-test. Scale bars represent 500 $\mu$ m.

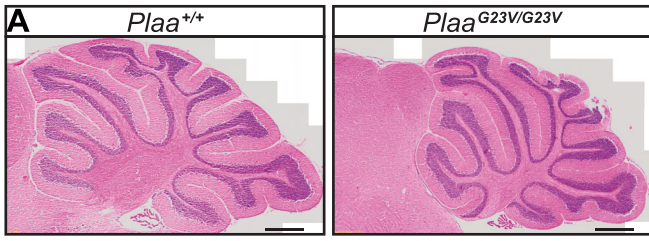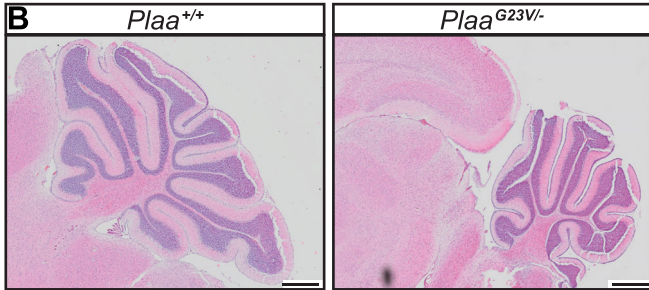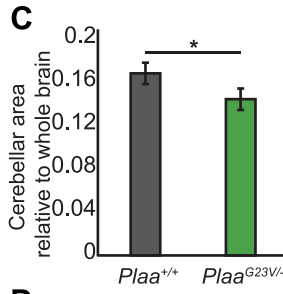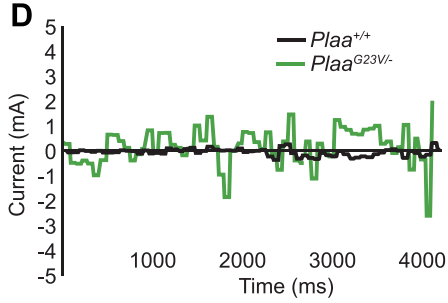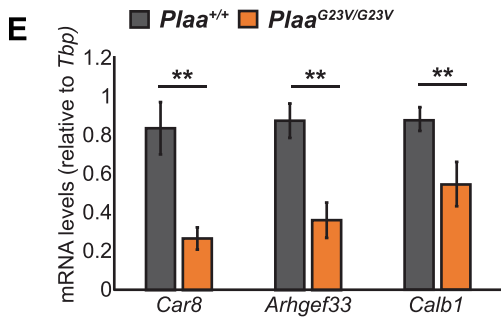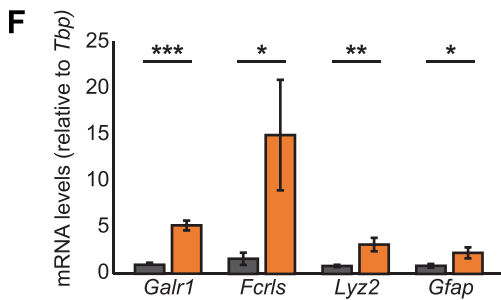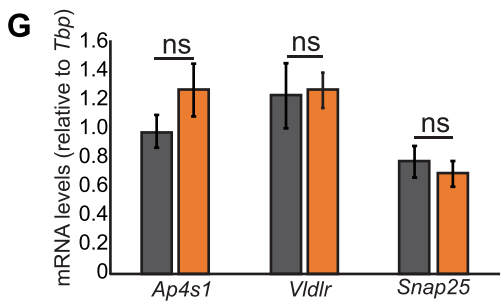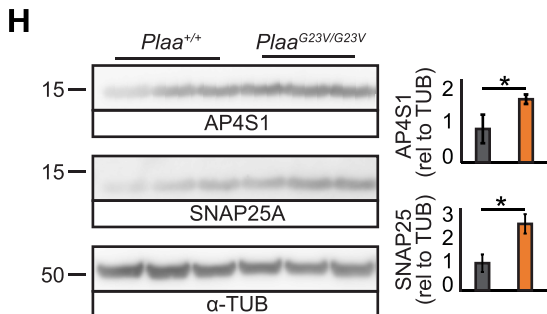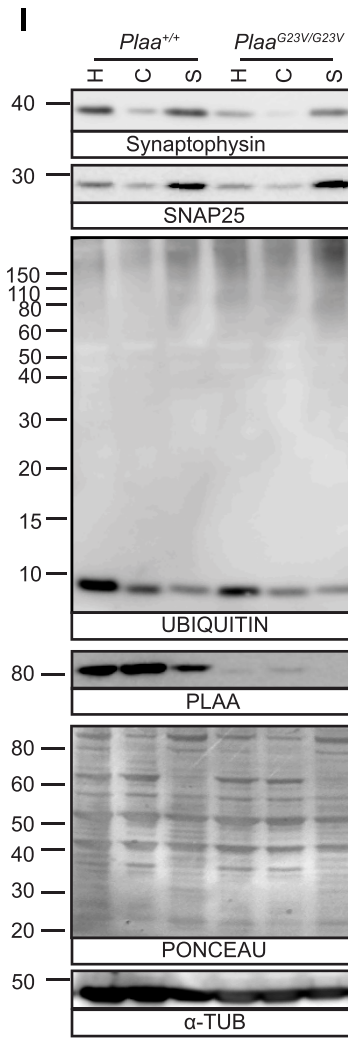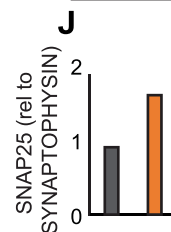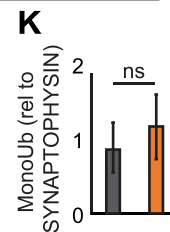



**Figure S6: Loss of PLAA function in NMJs decreases pool of recycling/reserve SVs with accumulation of enlarged endosomal structures with conspicuous neurofilament accumulations in mutant synaptic boutons.**

Related to **Figure 5**. (A) NMJs from 3 month old *Plaa*<sup>G23V/-</sup> mutant Tibialis Anterior (TA – hindlimb), Adductor Auris Longus (AAL – cranial) and transverse abdominus (TVA – abdominal muscles) stained with Neurofilament (NF), Synaptic Vesicle 2 (SV2) and Bungarotoxin (BTX) showing abnormal sprouting and accumulations, particularly evident in the NMJs innervating cranial muscles, quantified in **B** and **C**. Briefly, muscles were dissected and fixed in 4% PFA (Electron Microscopy Science) in PBS for 15 min. Post-synaptic acetylcholine receptors (AChRs) were labelled with  $\alpha$ -bungarotoxin (BTX) for 30 min. Muscles were permeabilised in 2% Triton X-100 in PBS for 30 min, then blocked in 4% bovine serum albumin (BSA)/1% Triton X-100 in PBS for 30 min before incubation overnight with immunoreagents (**Tables S7, S8**). Muscles were then whole-mounted in fluorescent mounting media. All quantification was performed by visual inspection of the muscle. (D-G) NMJs labelled with antibodies against only NF (green, **D,F**) and BTX (red) from AAL muscle from wild type and *Plaa*<sup>G23V/-</sup> mice at P15. The percentage of NMJs with accumulations (**E**) and the number of sprouts per NMJ (**G**) is quantified (n = 3 mice/ genotype). (H) Transmission electron microscopy of wild type littermate and *Plaa*<sup>G23V/G23V</sup> mutant synaptic boutons from NMJs on LAL cranial muscles at 3 months. While control NMJs have uniformly abundant pools of SVs throughout the bouton (left hand panels and **Figure 5J**, central pools of SVs are missing in *Plaa*<sup>G23V/G23V</sup> mutant boutons (center and right hand panels and **Figure 5K-M**). Remaining SVs are found either restricted to periphery clustered at active zones and/or denuded, despite being adjacent to well defined post-synaptic densities and folds. Prominent accumulations of enlarged endosomal structures and vacuolated structures are observed in mutant boutons. Central neurofilament accumulations (asterisk) are also apparent. For transmission electron microscopy, muscle samples were immersed in modified Karnovsky's fixative (2.5% glutaraldehyde, 2% paraformaldehyde in 0.1M sodium cacodylate buffer pH7.4 with 0.05% calcium chloride) at 4°C overnight, rinsed in 0.1M sodium cacodylate buffer pH7.4 with 0.05% calcium chloride before further NMJ sub-dissection, then post-fixed in 1% osmium tetroxide. Samples were dehydrated in graded acetone then progressively embedded in Epoxy embedding resin (medium: TAAB Lab. Equip). Ultrathin sections (~70 nm) were cut and stained with 2% uranyl acetate followed by Leica Lead stain (Leica) and viewed using a Philips CM 100 Compustage (FEI) Transmission Electron Microscope with an AMT CCD camera (Deben). Scale bar represents 60 $\mu$ m (**A**), 50 $\mu$ m (**D**), 20 $\mu$ m (**F**) and 500 nm (**H**) Error bars represent SEM. \* P < 0.05, Mann Whitney U test, n = 3 mice per genotype.

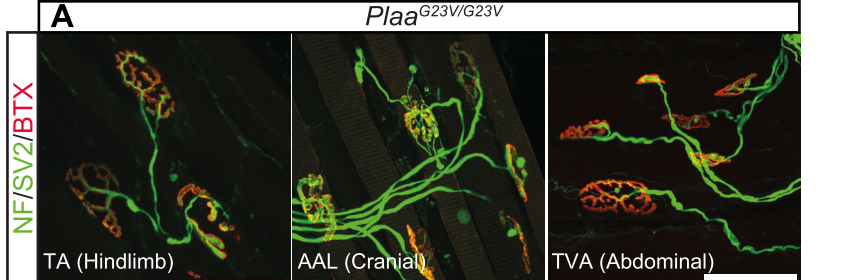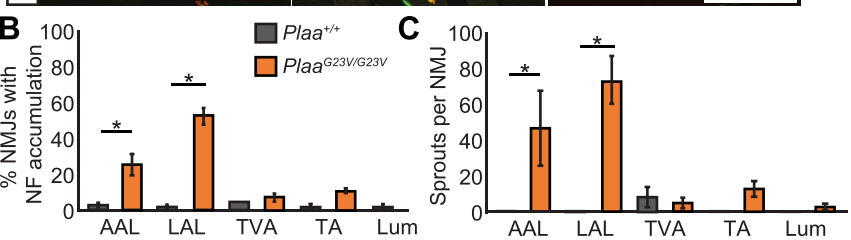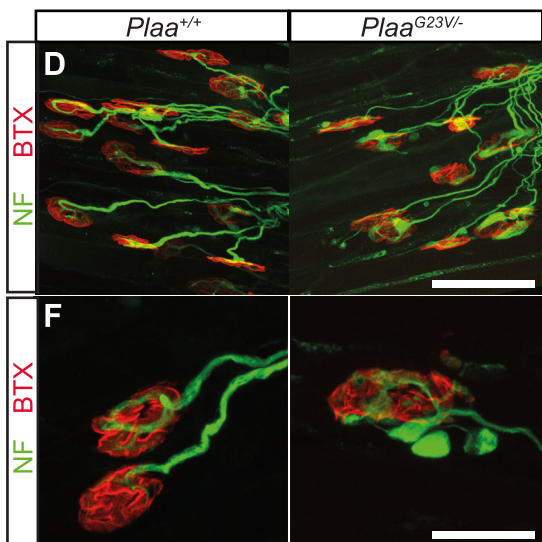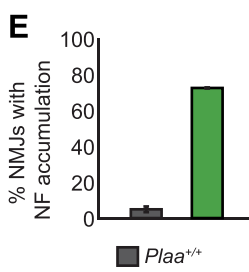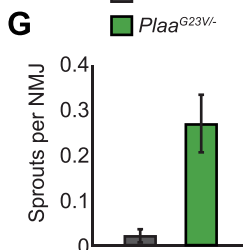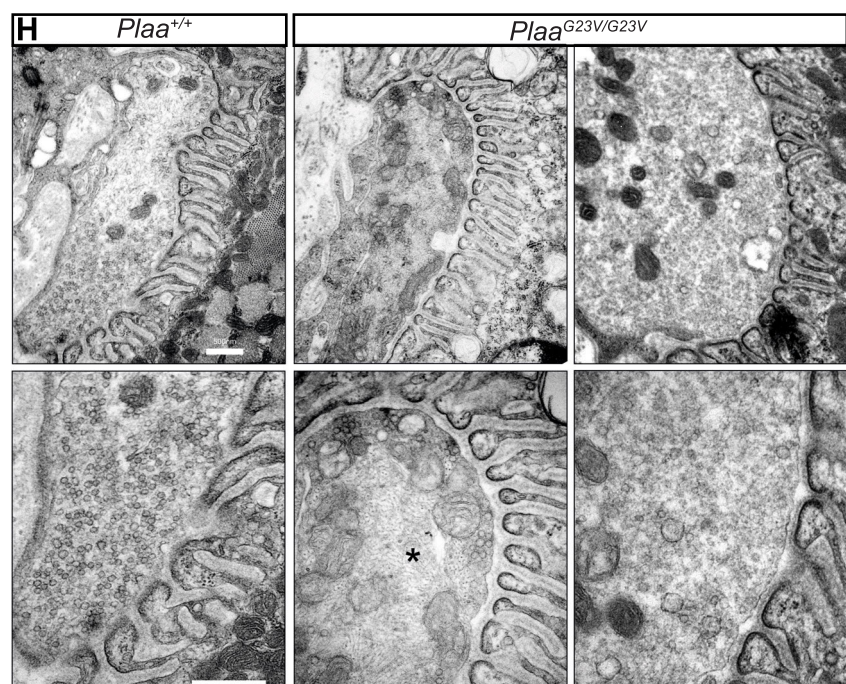

**Figure S7: Reduction in PLAA disrupts synaptic function at NMJs.**

Related to **Figure 6**. (A) Muscle fiber diameter is significantly reduced in *Plaa*<sup>G23V/G23V</sup> LAL muscles demonstrating muscle atrophy, perhaps due to reduced movement. (B) Endplate length is increased in *Plaa*<sup>G23V/G23V</sup> LAL muscles. (C-E) MEPP amplitude and rise time is unaffected in *Plaa*<sup>G23V/G23V</sup> LAL NMJs, however the half decay time is increased, consistent with a longer membrane time constant typically associated with atrophic muscle fibers. (F-I) However, of the LAL muscles fibers that responded (**Figure 6D**), EPPs appeared normal with similar amplitude, half decay and rise time to controls. All animals on this figure were 7 months old; n=2 control (*Plaa*<sup>G23V/+</sup>) and n=4 *Plaa*<sup>G23V/G23V</sup>, Student's T-test, \* P < 0.05, \*\* P < 0.01, \*\*\* P < 0.001.

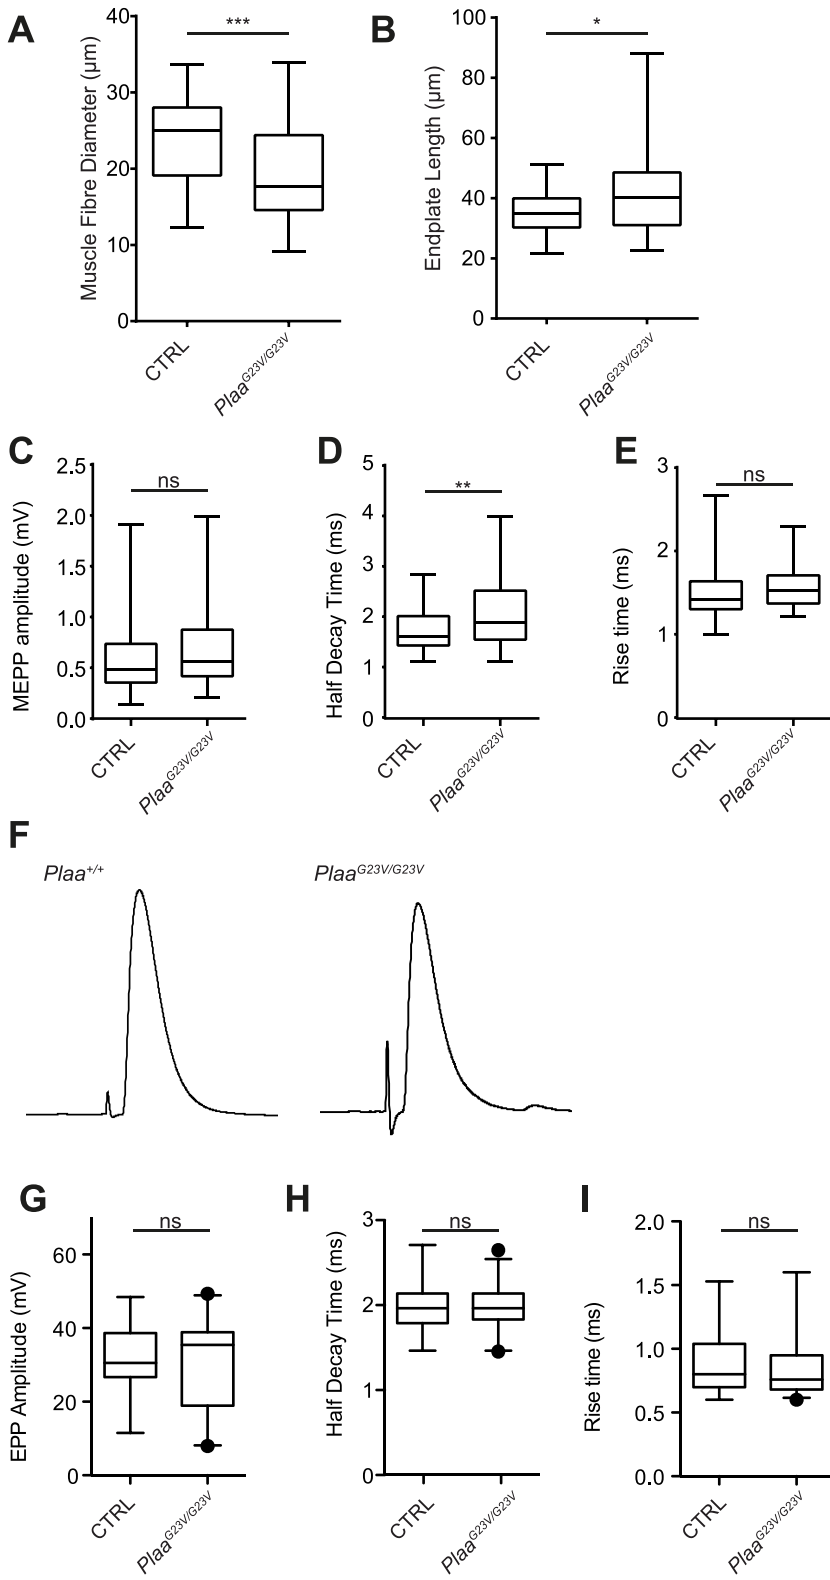



**Figure S8: p62 reroutes accumulated K63-linked polyUb substrates for autophagy in the absence of PLAA.**

Related to **Figure 7**. **(A)** Proteasome activity was assessed in freshly isolated cerebella lysates with AMC-labelled trypsin or chemotrypsin substrates (+/- inhibitor MG132). No impairment in proteasomal activity in *Plaa*<sup>G23V/G23V</sup> brain extracts was observed, similar to null cells (**Figure 2B**). **(B)** No compensatory increase in ubiquitin or ERAD genes was observed. **(C)** Confirmation of the specific accumulation of K63-ubiquitylated cargo in *Plaa*<sup>G23V/-</sup> cerebella upon affinity purification using the K63-specific ubiquitin binding domain (UBD) of Eps15 using K63 and K48-ubiquitin-specific antibodies. **(D)** Affinity purification of pan-ubiquitylated substrates using Ubqln1 UBD revealed no accumulation of total poly-ubiquitylated proteins in *Plaa*<sup>G23V/-</sup> cerebella, presumably as other non-K63-linked chains are masking the increase seen by K63-ubiquitin specific pulldown. **(E)** Pulldown of K48-ubiquitylated proteins revealed a very slight accumulation of K48-ubiquitylated proteins in *Plaa*<sup>G23V/-</sup> cerebella using Fam63 UBD. **(F)** To assay induction of autophagic responses under nutrient deprivation *Plaa*<sup>+/+</sup> and *Plaa*<sup>-/-</sup> MEFs were treated with BAFA1, starvation media EBSS or both. *Plaa*<sup>-/-</sup> MEFs show response to autophagy induction by starvation, as indicated by an increased LC3-II, suggesting the core autophagy machinery is intact. **(G)** A subset of the p62 foci colocalize with aberrant HRS positive endosomal structures in *Plaa*<sup>-/-</sup> MEFs. Enlarged panels are shown to the right and in **Figure 7E**. **(H)** Transfection of MEFs with LC3-RFP-GFP autophagy reporter reveals the total number of LC3+ foci are increased in *Plaa*<sup>-/-</sup> MEFs **(I)**. However, the ratio of mature autophagolysosomes (RFP only) to immature autophagosomes (double RFP/GFP- yellow) is unchanged **(J)**, suggesting increased basal autophagy, without impairing fusion events in *Plaa*<sup>-/-</sup> MEFs. n=3 per genotype. Scale bar represents 10µm. \* P < 0.05. Student's t-test. Error bars represent SEM, n = 3 MEF lines per genotype. Blots representative of n > 3 per genotype.

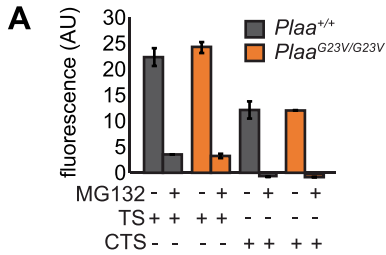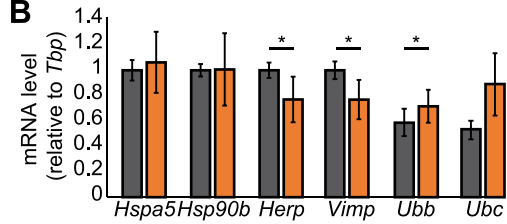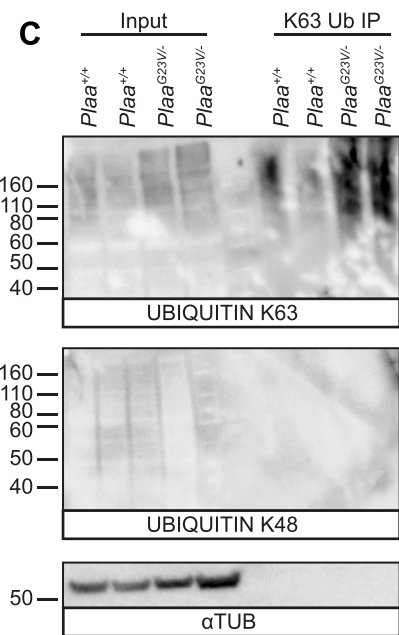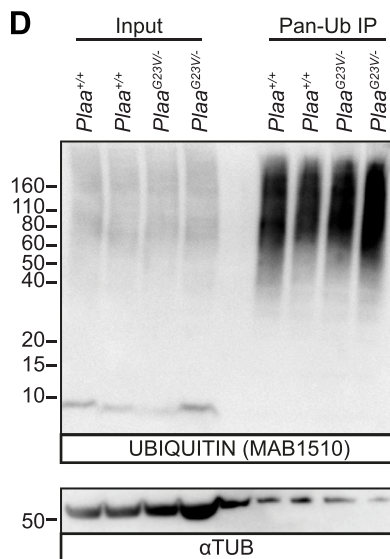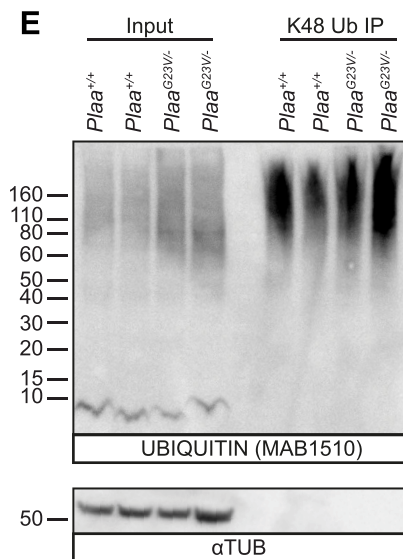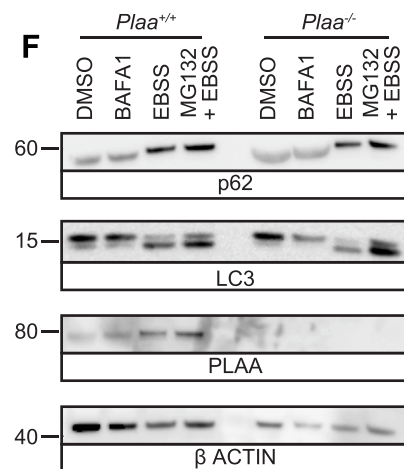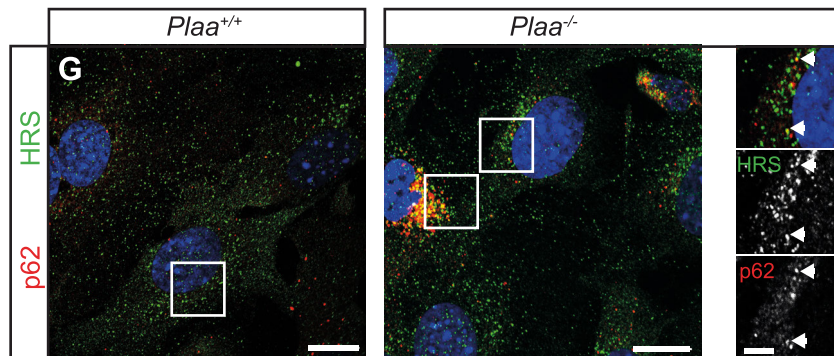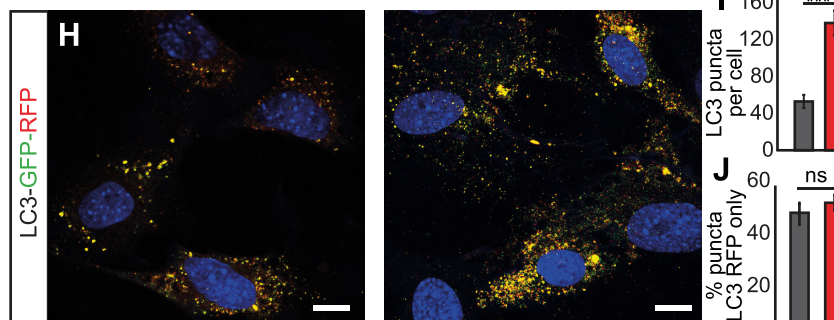

**Figure S9: cPLA2 activity is unchanged in *Plaa*<sup>G23V/-</sup> brains.**

(A) PLAA's implication in phospholipase biology has come from use of a 19 amino acid peptide fragment from PLAA (795aa protein), which activates phospholipase A<sub>2</sub> in a dose-dependent manner and bears considerable homology to melittin (bee venom)<sup>91</sup>. Activation of PLA2 leads to hydrolysis of phospholipids generating the precursor for eicosanoids, which are involved in diverse signaling cascades, primarily through their interaction with cellular receptors and ion channels. Whether endogenous PLAA directly activates cytoplasmic phospholipase A2 activity under physiological conditions remains unclear, and whether any effect could involve PLAA modulation of Ub signaling of additional intermediates has yet to be determined. (B,C) PLA2 activity in membrane extracts from P15 *Plaa*<sup>G23V/-</sup> brains were analyzed with fluorescent (B) and colorimetric (C) substrates. Neither showed significant change in cPLA2 activity in severely symptomatic brains, suggesting disrupted phospholipid signaling is not the primary cause of defects observed in early symptomatic neurons.

Brains were cut into 2mm cubes, rinsed in PBS and homogenised in 50mM Tris pH8.0, 1mM EDTA, 1mM EGTA, 20% glycerol plus HALT protease inhibitor (Pierce). Lysates were clarified at 10,000g for 10 minutes, and membrane fractionation was performed by spinning the supernatant at 100,000g for 1 hour at 4°C. The pellet was resuspended in homogenisation buffer plus 0.1% Triton X to give the membrane fraction. PLA2 activity was assayed with EnzChek Phospholipase A2 Assay Kit (ThermoFisher) (B), or cPLA2 Assay Kit (Cayman Chemicals) (C) according to manufacturers' instructions.

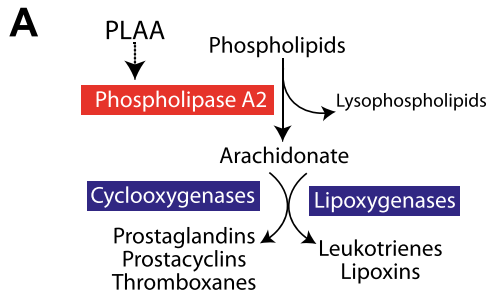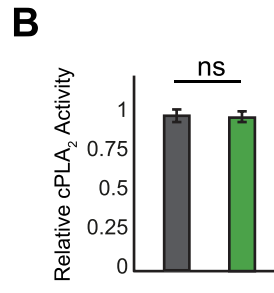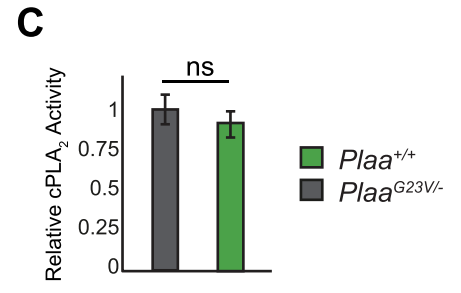

**Supplemental Table S1. Detailed clinical table.** Related to Figure 1.

| Patient #                            | A-IV-6     | A-IV-7    | A-IV-8    | Patient #        | A-IV-10                              | A-IV-1    | B-III-1  | C-III-1  |        |
|--------------------------------------|------------|-----------|-----------|------------------|--------------------------------------|-----------|----------|----------|--------|
| Gender                               | M          | M         | F         | Gender           | M                                    | F         | M        | M        |        |
| Diagnosis age                        | At birth   | At birth  | 1st week  | Diagnosis age    | At birth                             | 1st week  | 1st week | At birth |        |
| Age at death                         | 12 days    | 1.5 years | 2.3 years | Age at death     | live at 0.5 yea                      | 1.2 years | 5 years  | 6 years  |        |
| Clinical feature                     | HPO #      |           |           | Clinical feature |                                      |           |          |          |        |
| <i>Central nervous system</i>        |            |           |           |                  | <i>Central nervous system</i>        |           |          |          |        |
| Abnormal cortical gyration           | HP:0002536 | N.E.      | +         | +                | Abnormal cortical gyration           | +         | +        | +        | N.E.   |
| Abnormality of the cerebellum        | HP:0001317 | N.E.      | N.E.      | N.E.             | Abnormality of the cerebellum        | N.E.      | N.E.     | +        | +      |
| Bulbar symptoms                      | HP:0002483 | +         | +         | N.E.             | Bulbar symptoms                      | +         | +        | N.E.     | N.E.   |
| Central hypotonia                    | HP:0011398 | +         | +         | N.E.             | Central hypotonia                    | +         | +        | N.E.     | +      |
| Delayed myelination                  | HP:0012448 | N.E.      | +         | +                | Delayed myelination                  | N.E.      | -        | N.E.     | +      |
| Cessation of head growth             | HP:0004485 | N.E.      | +         | +                | Cessation of head growth             | +         | +        | +        | +      |
| Cognitive impairment                 | HP:0100543 | +         | +         | +                | Cognitive impairment                 | +         | +        | +        | +      |
| Generalized seizures                 | HP:0002197 | N.E.      | N.E.      | +                | Generalized seizures                 | +         | +        | +        | +      |
| Hypertonia                           | HP:0001276 | +         | +         | N.E.             | Hypertonia                           | +         | +        | +        | +      |
| Hypodysplasia of the corpus callosum | HP:0006849 | +         | +         | +                | Hypodysplasia of the corpus callosum | +         | N.E.     | N.E.     | +      |
| Optic atrophy                        | HP:0000648 | N.E.      | +         | N.E.             | Optic atrophy                        | N.E.      | N.E.     | +        | +      |
| Nystagmus                            | HP:0000639 | N.E.      | N.E.      | +                | Nystagmus                            | +         | +        | +        | N.E.   |
| Periventricular cysts                | HP:0007109 | +         | N.E.      | N.E.             | Periventricular cysts                | N.E.      | N.E.     | N.E.     | N.E.   |
| <i>Development</i>                   |            |           |           |                  | <i>Development</i>                   |           |          |          |        |
| Gross motor                          |            | N.E.      | Absent    | Absent           | Gross motor                          | Absent    | Absent   | Absent   | Absent |
| Fine motor                           |            | N.E.      | Absent    | Absent           | Fine motor                           | Absent    | Absent   | Absent   | Absent |
| Language                             |            | N.E.      | Absent    | Absent           | Language                             | Absent    | Absent   | Absent   | Absent |
| Social                               |            | N.E.      | Absent    | Absent           | Social                               | Absent    | Absent   | Absent   | Absent |
| <i>Other</i>                         |            |           |           |                  | <i>Other</i>                         |           |          |          |        |
| Congenital hypothyroidism            | HP:0000851 | +         | -         | -                | Congenital hypothyroidism            | -         | -        | -        | -      |
| Edema of the dorsum of feet          | HP:0012098 | -         | +         | -                | Edema of the dorsum of feet          | +         | -        | +        | +      |
| Edema of the dorsum of hands         | HP:0007514 | -         | -         | -                | Edema of the dorsum of hands         | +         | -        | -        | +      |
| Postaxial polydactyly                | HP:0100259 | +         | +         | -                | Postaxial polydactyly                | -         | -        | -        | -      |
| Coarse facies                        | HP:0000280 | +         | +         | +                | Coarse facies                        | +         | +        | +        | +      |
| Hirsutism                            | HP:0001007 | +         | N.E.      | N.E.             | Hirsutism                            | +         | N.E.     | N.E.     | N.E.   |



Table S2. List of exome variants identified genes in candidate interval in Family A. Related to Figure 1.

**SPLICE REGION VARIANT**

| Position   | Change | Filter | Score | Depth | Genotype | gene         | transcript      | Effect                                                      | AA change | Grantham score | dbsnp      | PolyPhen | SIFT |
|------------|--------|--------|-------|-------|----------|--------------|-----------------|-------------------------------------------------------------|-----------|----------------|------------|----------|------|
| 9:14806848 | C>A    | .      | 222   | 42    | HOMO     | <i>FREM1</i> | ENST00000380881 | splice_region_variant&intron_variant                        |           |                | rs10810249 |          |      |
| 9:14806848 | C>A    | .      | 222   | 42    | HOMO     | <i>FREM1</i> | ENST00000380875 | splice_region_variant&intron_variant&NMD_transcript_variant |           |                | rs10810249 |          |      |
| 9:14806848 | C>A    | .      | 222   | 42    | HOMO     | <i>FREM1</i> | ENST00000380880 | splice_region_variant&intron_variant                        |           |                | rs10810249 |          |      |
| 9:14806848 | C>A    | .      | 222   | 42    | HOMO     | <i>FREM1</i> | NM_144966.5     | splice_region_variant&intron_variant                        |           |                | rs10810249 |          |      |

**MISSENSE VARIANT**

| Position   | Change | Filter | Score | Depth | Genotype | gene          | transcript      | Effect                                  | AA change | Grantham score | dbsnp           | PolyPhen                 | SIFT              |
|------------|--------|--------|-------|-------|----------|---------------|-----------------|-----------------------------------------|-----------|----------------|-----------------|--------------------------|-------------------|
| 9:14722477 | G>C    | .      | 219   | 80    | HOMO     | <i>CER1</i>   | NM_005454.2     | missense_variant                        | A/G       |                | 60 rs3747532    | benign(0)                | tolerated(1)      |
| 9:14819370 | G>T    | .      | 222   | 142   | HOMO     | <i>FREM1</i>  | ENST00000380881 | missense_variant                        | S/Y       |                | 144 rs7023244   | probably_damaging(0.924) | deleterious(0.01) |
| 9:14819370 | G>T    | .      | 222   | 142   | HOMO     | <i>FREM1</i>  | ENST00000380875 | missense_variant&NMD_transcript_variant | S/Y       |                | 144 rs7023244   | probably_damaging(0.975) | deleterious(0.01) |
| 9:14819370 | G>T    | .      | 222   | 142   | HOMO     | <i>FREM1</i>  | ENST00000380880 | missense_variant                        | S/Y       |                | 144 rs7023244   | probably_damaging(0.924) | deleterious(0.01) |
| 9:14819370 | G>T    | .      | 222   | 142   | HOMO     | <i>FREM1</i>  | NM_144966.5     | missense_variant                        | S/Y       |                | 144 rs7023244   | probably_damaging(0.924) | deleterious(0.01) |
| 9:14846036 | C>G    | .      | 222   | 127   | HOMO     | <i>FREM1</i>  | ENST00000380881 | missense_variant                        | V/L       |                | 32 rs2779500    | benign(0.029)            | tolerated(0.1)    |
| 9:14846036 | C>G    | .      | 222   | 127   | HOMO     | <i>FREM1</i>  | ENST00000380875 | missense_variant&NMD_transcript_variant | V/L       |                | 32 rs2779500    | benign(0.03)             | tolerated(0.18)   |
| 9:14846036 | C>G    | .      | 222   | 127   | HOMO     | <i>FREM1</i>  | ENST00000380880 | missense_variant                        | V/L       |                | 32 rs2779500    | benign(0.029)            | tolerated(0.1)    |
| 9:14846036 | C>G    | .      | 222   | 127   | HOMO     | <i>FREM1</i>  | NM_144966.5     | missense_variant                        | V/L       |                | 32 rs2779500    | benign(0.029)            | tolerated(0.1)    |
| 9:21187121 | T>A    | .      | 222   | 230   | HOMO     | <i>IFNA4</i>  | NM_021068.2     | missense_variant                        | E/V       |                | 121 rs113045626 | benign(0.057)            | tolerated(0.14)   |
| 9:21187311 | C>T    | .      | 222   | 86    | HOMO     | <i>IFNA4</i>  | NM_021068.2     | missense_variant                        | A/T       |                | 58 rs1062571    | benign(0.04)             | tolerated(0.19)   |
| 9:21206763 | G>T    | .      | 222   | 105   | HOMO     | <i>IFNA10</i> | NM_002171.1     | missense_variant                        | L/I       |                | 5 rs56035072    | probably_damaging(0.991) | deleterious(0.01) |
| 9:21207000 | C>G    | .      | 222   | 63    | HOMO     | <i>IFNA10</i> | NM_002171.1     | missense_variant                        | G/R       |                | 125 rs10113875  | benign(0.042)            | tolerated(0.55)   |
| 9:21207005 | C>G    | .      | 222   | 57    | HOMO     | <i>IFNA10</i> | NM_002171.1     | missense_variant                        | S/T       |                | 58 rs10113876   | benign(0.348)            | tolerated(0.52)   |
| 9:21227622 | A>C    | .      | 221   | 105   | HOMO     | <i>IFNA17</i> | NM_021268.2     | missense_variant                        | I/R       |                | 97 rs9298814    | benign(0)                | tolerated(1)      |
| 9:21228040 | C>G    | .      | 222   | 111   | HOMO     | <i>IFNA17</i> | NM_021268.2     | missense_variant                        | G/R       |                | 125 rs12552812  | benign(0.001)            | tolerated(1)      |
| 9:25677953 | T>C    | .      | 51.3  | 7     | HOMO     | <i>TUSC1</i>  | NM_001004125.2  | missense_variant                        | N/D       |                | 23 rs34498078   | benign(0)                | tolerated(1)      |
| 9:26946976 | C>A    | .      | 98.1  | 7     | HOMO     | <i>PLAA</i>   | ENST00000523212 | missense_variant                        | G/V       |                | 109 .           | probably_damaging(0.919) | deleterious(0.01) |
| 9:26946976 | C>A    | .      | 98.1  | 7     | HOMO     | <i>PLAA</i>   | ENST00000520884 | missense_variant                        | G/V       |                | 109 .           | probably_damaging(0.991) | deleterious(0.02) |
| 9:26946976 | C>A    | .      | 98.1  | 7     | HOMO     | <i>PLAA</i>   | NM_001031689.2  | missense_variant                        | G/V       |                | 109 .           | probably_damaging(0.991) | deleterious(0.01) |
| 9:27183463 | A>C    | .      | 222   | 169   | HOMO     | <i>TEK</i>    | ENST00000406359 | missense_variant                        | Q/P       |                | 76 rs682632     | benign(0)                | tolerated(0.3)    |
| 9:27183463 | A>C    | .      | 222   | 169   | HOMO     | <i>TEK</i>    | ENST00000519097 | missense_variant                        | Q/P       |                | 76 rs682632     | benign(0)                | tolerated(0.29)   |
| 9:27183463 | A>C    | .      | 222   | 169   | HOMO     | <i>TEK</i>    | ENST00000519080 | missense_variant                        | Q/P       |                | 76 rs682632     | benign(0)                | tolerated(0.31)   |
| 9:27183463 | A>C    | .      | 222   | 169   | HOMO     | <i>TEK</i>    | NM_000459.3     | missense_variant                        | Q/P       |                | 76 rs682632     | benign(0)                | tolerated(0.57)   |
| 9:27524731 | A>G    | .      | 222   | 146   | HOMO     | <i>IFNK</i>   | NM_020124.2     | missense_variant                        | K/E       |                | 56 rs700785     | benign(0.001)            | tolerated(1)      |

**Table S3.** Numbers born from  $Plaa^{+/-} \times Plaa^{+/-}$  intercrosses.

| Age     | $Plaa^{+/+}$ | $Plaa^{+/-}$ | $Plaa^{-/-}$ | Chi squared |
|---------|--------------|--------------|--------------|-------------|
| E11.5   | 53           | 110          | 41           | P = 0.2636  |
| E13.5   | 15           | 28           | 5            | P = 0.0639  |
| E14.5   | 32           | 52           | 10           | P = 0.0034  |
| E15.5   | 14           | 22           | 5            | P = 0.1243  |
| Weaning | 60           | 103          | 0            | P < 0.0001  |

**Table S4.** Numbers born from  $Plaa^{+/G23V} \times Plaa^{+/G23V}$  (genotyped at weaning).

| $Plaa^{+/+}$ | $Plaa^{+/G23V}$ | $Plaa^{G23V/G23V}$ | Chi squared |
|--------------|-----------------|--------------------|-------------|
| 64           | 99              | 49                 | P = 0.2179  |

**Table S5.** Numbers born from  $Plaa^{+/-} \times Plaa^{+/G23V}$  (genotyped at ~P14).

| $Plaa^{+/+}$ | $Plaa^{+/-}$ | $Plaa^{+/G23V}$ | $Plaa^{G23V/-}$ | Chi squared |
|--------------|--------------|-----------------|-----------------|-------------|
| 14           | 11           | 8               | 18              | P = 0.2314  |

**Table S7 Primary antibodies**

| <b>Antigen</b> | <b>Antibody/Clone Name</b> | <b>Host species</b> | <b>Source</b>                   | <b>Application</b>         |
|----------------|----------------------------|---------------------|---------------------------------|----------------------------|
| a-tubulin      | ab4074                     | Rabbit              | Abcam                           | WB (1:1000)                |
| β-Actin        | 20536-1-AP                 | Rabbit              | Proteintech Group               | WB (1:1000)                |
| AP4S1          | ab157573                   | Mouse               | Abcam                           | WB (1:1000)                |
| CD71           | R17217 (FITC conjugated)   | Mouse               | Molecular Probes                | FACS (1:100)               |
| EEA1           | 3288P                      | Rabbit              | Cell Signalling Technology      | IF (1:100)                 |
| FLAG           | DDK (4C5)                  | Mouse               | Origene                         | IF (1:500)                 |
| GFP            | 632375                     | Mouse               | Clontech                        | WB (1:10000)               |
| HA             | 16B12                      | Mouse               | Biolegend                       | WB (1:1000)                |
| HRS            | ab15539                    | Rabbit              | Abcam                           | IF (1:100)                 |
| LAMP1          | ab24170                    | Rabbit              | Abcam                           | IF (1:1000)                |
| LC3B           | L7543                      | Rabbit              | Sigma                           | WB (1:1000)                |
| Neurofilament  | 2H3                        | Mouse               | DSHB                            | IF (1:500)                 |
| p62            | BML-PW9860-0100            | Rabbit              | Enzo Life Sciences              | IF () WB (1:1000)          |
| p62            | GP62-C                     | Guinea Pig          | Progen Biotechnik               | IF (1:100)                 |
| PLAA           | 12529-1-AP                 | Rabbit              | Abcam                           | WB (1:500-1000) IF (1:500) |
| SNAP25A        | 3067                       | Rabbit              | Kind gift from Luke Chamberlain | WB (1:1000)                |
| SNAP25         | ab5666                     | Rabbit              | Abcam                           | WB (1:1000)                |
| SV2            | SV2                        | Mouse               | DSHB                            | IF (1:500) WB (1:500)      |
| SYNAPTOPHYSIN  | SVP-38                     | Mouse               | Sigma                           | WB (1:1000)                |
| TER119         | TER119 (APC conjugated)    | Mouse               | Molecular Probes                | FACS (1:100)               |
| UBIQUITIN      | Z0458                      | Rabbit              | DAKO                            | WB (1:2,500)               |
| UBIQUITIN      | MAB1510                    | Mouse               | EMD Millipore                   | WB (1:500)                 |
| UBIQUITIN-K48  | Apu2                       | Rabbit              | EMD Millipore                   | WB (1:500)                 |
| UBIQUITIN-K63  | Apu3                       | Rabbit              | EMD Millipore                   | WB (1:500)                 |
| VLDLR          | 6A6                        | Mouse               | Santa Cruz                      | WB (1:200)                 |

**Table S8 Secondary antibodies**

| <b>Antigen</b>                             | <b>Host Species</b> | <b>Dilution</b> | <b>Source</b>          | <b>Application</b>  |
|--------------------------------------------|---------------------|-----------------|------------------------|---------------------|
| ECL $\alpha$ -Mouse IgG, HRP-conjugated    | Sheep               | 1:7500          | GE Healthcare UK Ltd   | WB                  |
| ECL $\alpha$ -Rabbit IgG, HRP-conjugated   | Sheep               | 1:7500          | GE Healthcare UK Ltd   | WB                  |
| Alexa 488-conjugated- $\alpha$ -Mouse      | Donkey              | 1:500           | Molecular Probes       | IF                  |
| Alexa 594-conjugated- $\alpha$ -Rabbit     | Donkey              | 1:500           | Molecular Probes       | IF                  |
| Alexa 488-conjugated- $\alpha$ -Rabbit     | Donkey              | 1:500           | Molecular Probes       | IF                  |
| Alexa 594-conjugated- $\alpha$ -Guinea Pig | Goat                | 1:500           | Molecular Probes       | IF                  |
| Alexa 488-conjugated- $\alpha$ -Mouse      | Rabbit              | 1:250           | Jackson ImmunoResearch | IF (NMJ wholemount) |

**Table S9 Primer and Crispr Guide Sequences**

| Name                   | Sequence                                                                                                                                                                                                                       | Notes                                                                                                                          |
|------------------------|--------------------------------------------------------------------------------------------------------------------------------------------------------------------------------------------------------------------------------|--------------------------------------------------------------------------------------------------------------------------------|
| 713                    | 5'- CGACCCCATGCATCGATGAT -3'                                                                                                                                                                                                   | Genotyping <i>Plaa</i> <sup>-</sup> Vector specific primers: Will only amplify from mutant allele                              |
| 714                    | 5'- CCCGTAGCTCCAATCCTTCC -3'                                                                                                                                                                                                   |                                                                                                                                |
| 705                    | 5'- TGCCCTTTGCTTTCTTGTTC -3'                                                                                                                                                                                                   | Genotyping <i>Plaa</i> <sup>-</sup> : Will not amplify from mutant allele                                                      |
| 706                    | 5'-TGACGGTCCAAAAAGTTTC -3'                                                                                                                                                                                                     |                                                                                                                                |
| 3F                     | 5'- GGCCTGTGGACGAGTCTC-3'                                                                                                                                                                                                      | Genotyping <i>Plaa</i> <sup>G23V</sup> : Followed by <i>Av</i> II digestion as c.68G>T change introduces an <i>Av</i> II site. |
| 2R                     | 5'-GATCCCGGGACACAGACAC-3'                                                                                                                                                                                                      |                                                                                                                                |
| CRISPR Guide #1        | 5'-CACGAACTGGACGTGAG-3'                                                                                                                                                                                                        |                                                                                                                                |
| CRISPR Guide #2        | 5'-GGTGTGCTGCCTTACCCGC-3'<br>5'-                                                                                                                                                                                               |                                                                                                                                |
| CRISPR Repair Template | CCCGGGGGCCGGGCTCCGGATCCACGCTGGCCATGGCG<br>AGCGGCGCCTCCAGATACCGGCTGAGCTGCTCGTCCCG<br>GGCCACGAACTGGACGTGAGGGTCCCTGGTGTGCTGCCTC<br>TACCCGCCGGGAGCCTTTGTGTCTGTGTCCCGGGATCGG<br>ACCACCGCCTCTGGGCTCCAGACAGGTGAGCGCTGCTA<br>GTCCCG-3' | c.68G>T change highlighted in bold                                                                                             |



91. Clark, M.A., Ozgur, L.E., Conway, T.M., Dispoto, J., Crooke, S.T., and Bomalaski, J.S. (1991). Cloning of a phospholipase A2-activating protein. *Proceedings of the National Academy of Sciences of the United States of America* 88, 5418-5422.
